# Supplementary material
Source: PubMed Central journal article supplement (PMC6585506)
Supplement: AEM.02659-18-s0001.pdf [file AEM.02659-18-s0001.pdf]

## **Supplementary material**

### **Cloning of environmental sample.**

Environmental clones from Salada de Monasterio (35°47'S. 57°52'W) and El Triunfo (35°47'S. 57°52'W) Argentinian Pampean shallow lakes were incorporated in the reference tree (for lake description see (1)). The samples were taken on August 2014 in the center of the lake. Fifty ml of lake water pre-filtered through a 50 µm net to remove large particles and were then filtered through a 0.22 µm pore-size polycarbonate filters (Millipore). Genomic DNA from filters was extracted using a CTAB protocol (2) as described in Llamas et al (3). The 16S rRNA gene plus the 16S-23S Internal Transcribed Spacer (ITS) PCR products (2200 pb) were cloned and sequenced.

Genomic DNA was amplified with primers 27F (AGAGTTTGATCMTGGCTCAG; Lane, 1991) and PITSEND(R) (CTCTGTGTGCCAAGGTATC; Becker et al., 2000). The amplification was performed using the PCR protocol described in Llamas et al (3). The StrataClone PCR Cloning Kit (Agilent Technologies) was used for cloning, following the manufacturer's instructions. Clones were screened by a direct PCR. Forty-eight positive clones of each lake were sequenced (Macrogen, South Korea) using the primer listed in Table S2 of Huber et al. (4). The sequences were edited using Pregap4 and assembled using gap4 from the Staden package (Staden, 1996). Identical sequences (detected by cluster analysis using USEARCH; (5)) and Chimeras (UCHIME, (6)) were removed. The 16S rRNA gene was extracted from the sequences (GENEIOUS v 9.1.5, (7)) and used in the phylogenetic reconstruction.

**Table S1:** Full and partial genomic libraries (FLS and SLS, respectively) were constructed using 1334 sequences from 5 representative phylogenetic clades of *Synechococcus*, *Prochlorococcus* and *Cyanobium*.

| Libraries                | Clades *                                                                                                                                              | # Sequences | Full length sequences libraries (FLS) | Short length sequences libraries (SLS)                      |
|--------------------------|-------------------------------------------------------------------------------------------------------------------------------------------------------|-------------|---------------------------------------|-------------------------------------------------------------|
| <b>Picocyanobacteria</b> |                                                                                                                                                       | 1334        | FLS-Pcy                               | SLS-Pcy <sub>(v2-v4)</sub><br>SLS-Pcy <sub>(v5-v4)</sub>    |
| <b>Cyanobium</b>         | <i>A-Cyanobium gracile</i> <sup>a</sup>                                                                                                               | 71          | FLS-Cyab                              | SLS-Cyab <sub>(v2-v4)</sub><br>SLS-Cyab <sub>(v5-v7)</sub>  |
| <b>Syn1</b>              | Marine <i>Synechococcus</i> subcluster 5.1.<br>Clades: I - II- III-IV-V-VI- VII-VIII-IX-XVI-CRD1 b                                                    | 594         | FLS-Syn1                              | SLS-Syn1 <sub>(v2-v4)</sub><br>SLS-Syn1 <sub>(v5-v7)</sub>  |
| <b>Syn 2</b>             | Marine <i>Synechococcus</i> subcluster 5.3 <sup>b</sup> +<br>Freshwater clades: I -B-E- H-U-Cz-M <sup>c</sup>                                         | 231         | FLS-Syn2                              | SLS-Syn2 <sub>(v2-v4)</sub><br>SLS-Syn2 <sub>(v5-v7)</sub>  |
| <b>Syn 3</b>             | Marine <i>Synechococcus</i> subcluster 5.2 <sup>b</sup> +<br>undefined clades of freshwater strains closed related with <i>Synechococcus</i> PCC 7942 | 36          | FLS-Syn3                              | SLS-Syn3 <sub>(v2-v4)</sub><br>SLS-Syn3 <sub>(v5-v7)</sub>  |
| <b>Prochlorococcus</b>   | HLI-HLII-LLI-LLII-LLIII-LLIV <sup>d</sup>                                                                                                             | 402         | FLS-Proch                             | SLS-Proch <sub>(v2-v4)</sub><br>SLS- Proch <sub>v5-v7</sub> |

\*Phylogenetic classification as in <sup>a</sup> Crosbie et al.(8); Callieri et al.(9); <sup>b</sup> Ahlgren and Rocap (10); <sup>c</sup> Crosbie et al. (8); Jasser et al. (11); <sup>d</sup> Biller et al.(12).

**Table S2:** *In silico* evaluation of specificity and coverage rate of primer pairs designed in this work compared with those designed by Nübel et al. (13) allowing one mismatch.

| Taxonomy *                                                                                            | coverage (%) |            | Match <sup>c</sup> |            | Eligible <sup>d</sup> |            | specificity (%) <sup>e</sup> |            | outgroup_matched <sup>f</sup> |            | outgroup_matchable <sup>g</sup> |            |
|-------------------------------------------------------------------------------------------------------|--------------|------------|--------------------|------------|-----------------------|------------|------------------------------|------------|-------------------------------|------------|---------------------------------|------------|
|                                                                                                       | This work    | Nübel (13) | This work          | Nübel (13) | This work             | Nübel (13) | This work                    | Nübel (13) | This work                     | Nübel (13) | This work                       | Nübel (13) |
| Bacteria                                                                                              | 0.6          | 0.7        | 3429               | 4071       | 572584                | 575243     | 100                          | 100        | 88051                         | 96341      | 0                               | 0          |
| Bacteria;Acidobacteria                                                                                | 0            | 0.0        | 1                  | 1          | 14486                 | 14532      | 99.5                         | 99.4       | 646149                        | 657052     | 3428                            | 4069       |
| Bacteria;Actinobacteria                                                                               | 0            | 0.0        | 1                  | 0          | 59305                 | 59486      | 99.4                         | 0          | 601330                        | 612098     | 3428                            | 4070       |
| Bacteria;Cyanobacteria                                                                                | 25.5         | 30.2       | 3422               | 4064       | 13434                 | 13466      | 100                          | 100        | 647201                        | 658118     | 7                               | 6          |
| Bacteria;Cyanobacteria;Oxyphotobacteria;Synechococcales;Cyanobiaceae                                  | 95.5         | 95.6       | 1700               | 1707       | 1781                  | 1785       | 99.7                         | 99.6       | 658854                        | 669799     | 1729                            | 2363       |
| Bacteria;Cyanobacteria;Oxyphotobacteria;Synechococcales;Cyanobiaceae;Cyanobium PCC-6307               | 96.1         | 96.8       | 622                | 629        | 647                   | 650        | 99.6                         | 99.5       | 659988                        | 670934     | 2807                            | 3441       |
| Bacteria;Cyanobacteria;Oxyphotobacteria;Synechococcales;Cyanobiaceae;Prochlorococcus MIT9313          | 94.9         | 92.5       | 427                | 417        | 450                   | 451        | 99.5                         | 99.5       | 660185                        | 671133     | 3002                            | 3653       |
| Bacteria;Cyanobacteria;Oxyphotobacteria;Synechococcales;Cyanobiaceae;Synechococcus CC9902             | 95           | 96.5       | 604                | 614        | 636                   | 636        | 99.6                         | 99.5       | 659999                        | 670948     | 2825                            | 3456       |
| Bacteria;Cyanobacteria;Oxyphotobacteria;Synechococcales;Cyanobiaceae;Synechococcus MBIC10613          | 100          | 100.0      | 5                  | 5          | 5                     | 5          | 99.5                         | 99.4       | 660630                        | 671579     | 3424                            | 4065       |
| Bacteria;Cyanobacteria;Oxyphotobacteria;Synechococcales;Cyanobiaceae;[Synechococcus] spongiarum group | 97.6         | 97.6       | 41                 | 41         | 42                    | 42         | 99.5                         | 99.4       | 660593                        | 671542     | 3388                            | 4029       |
| Bacteria;Cyanobacteria;Oxyphotobacteria;Synechococcales                                               | 93.6         | 95.5       | 1700               | 1739       | 1817                  | 1821       | 99.7                         | 99.7       | 658818                        | 669763     | 1729                            | 2331       |
| Bacteria;Cyanobacteria;Oxyphotobacteria;Thermosynechococcales                                         | 6.1          | 84.0       | 3                  | 42         | 49                    | 50         | 99.5                         | 99.4       | 660586                        | 671534     | 3426                            | 4028       |
| Bacteria;Cyanobacteria;Melainabacteria                                                                | 0            | 0.4        | 0                  | 2          | 506                   | 510        | 0                            | 99.4       | 660129                        | 671074     | 3429                            | 4068       |
| Bacteria;Cyanobacteria;Oxyphotobacteria                                                               | 26.6         | 31.6       | 3422               | 4062       | 12846                 | 12874      | 100                          | 100        | 647789                        | 658710     | 7                               | 8          |
| Bacteria;Cyanobacteria;Oxyphotobacteria;Chloroplast                                                   | 0            | 9.4        | 0                  | 565        | 6031                  | 6040       | 0                            | 99.5       | 654604                        | 665544     | 3429                            | 3505       |
| Bacteria;Cyanobacteria;Oxyphotobacteria;Eurycoccales                                                  | 0            | 26.7       | 0                  | 12         | 45                    | 45         | 0                            | 99.4       | 660590                        | 671539     | 3429                            | 4058       |
| Bacteria;Cyanobacteria;Oxyphotobacteria;Fr127                                                         | 0            | 100.0      | 0                  | 4          | 4                     | 4          | 0                            | 99.4       | 660631                        | 671580     | 3429                            | 4066       |
| Bacteria;Cyanobacteria;Oxyphotobacteria;Leptolyngbyales                                               | 5.1          | 93.4       | 10                 | 184        | 196                   | 197        | 99.5                         | 99.4       | 660439                        | 671387     | 3419                            | 3886       |
| Bacteria;Cyanobacteria;Oxyphotobacteria;Limnotrichales                                                | 5.9          | 82.4       | 1                  | 14         | 17                    | 17         | 99.5                         | 99.4       | 660618                        | 671567     | 3428                            | 4056       |
| Bacteria;Cyanobacteria;Oxyphotobacteria;Neosynechococcales                                            | 0            | 100.0      | 0                  | 1          | 1                     | 1          | 0                            | 99.4       | 660634                        | 671583     | 3429                            | 4069       |
| Bacteria;Cyanobacteria;Oxyphotobacteria;Nostocales                                                    | 45           | 19.7       | 1690               | 741        | 3757                  | 3768       | 99.7                         | 99.5       | 656878                        | 667816     | 1739                            | 3329       |
| Bacteria;Cyanobacteria;Oxyphotobacteria;Oxyphotobacteria Incertae Sedis                               | 2.6          | 92.5       | 13                 | 458        | 493                   | 495        | 99.5                         | 99.5       | 660142                        | 671089     | 3416                            | 3612       |
| Bacteria;Cyanobacteria;Oxyphotobacteria;Phormidemiales                                                | 0.3          | 91.4       | 1                  | 266        | 291                   | 291        | 99.5                         | 99.4       | 660344                        | 671293     | 3428                            | 3804       |
| Bacteria;Cyanobacteria;Oxyphotobacteria;Pseudanabaenales                                              | 2            | 4.9        | 2                  | 5          | 102                   | 102        | 99.5                         | 99.4       | 660533                        | 671482     | 3427                            | 4065       |
| Bacteria;Cyanobacteria;Oxyphotobacteria;RD011                                                         | 0            | 87.5       | 0                  | 7          | 8                     | 8          | 0                            | 99.4       | 660627                        | 671576     | 3429                            | 4063       |
| Bacteria;Cyanobacteria;Oxyphotobacteria;RD017                                                         | 8.3          | 91.7       | 1                  | 11         | 12                    | 12         | 99.5                         | 99.4       | 660623                        | 671572     | 3428                            | 4059       |
| Bacteria;Cyanobacteria;Oxyphotobacteria;SepB-3                                                        | 12.5         | 100.0      | 1                  | 8          | 8                     | 8          | 99.5                         | 99.4       | 660627                        | 671576     | 3428                            | 4062       |
| Bacteria;Cyanobacteria;Oxyphotobacteria;uncultured                                                    | 0            | 75.0       | 0                  | 3          | 4                     | 4          | 0                            | 99.4       | 660631                        | 671580     | 3429                            | 4067       |
| Bacteria;Patescibacteria                                                                              | 0            | 0.1        | 2                  | 5          | 8956                  | 4521       | 99.5                         | 99.4       | 651679                        | 667063     | 3427                            | 4065       |
| Bacteria;Proteobacteria                                                                               | 0            | 0.0        | 1                  | 1          | 228791                | 229791     | 99.2                         | 99.1       | 431844                        | 441793     | 3428                            | 4069       |
| Bacteria;Verrucomicrobia                                                                              | 0            | 0.0        | 2                  | 0          | 4385                  | 4411       | 99.5                         | 0          | 656250                        | 667173     | 3427                            | 4070       |

a= SILVA taxonomy, SSU r132 database; RefNR Sequence Collection

b=(match/eligible)\*100

c=number of match hits in the taxa path

d=number of hits with sequence data at the primers position in the taxa path

e=100-(outgroup\_matches/outgroup\_matchable)\*100

f=number of matched hits outside the taxonomic path

g=number of matchable hits outside the taxonomic path

**Table S3:** *In silico* evaluation of specificity and coverage rate of primer pairs designed in this work compared with those designed by Nübel et al. (13) allowing two mismatches.

| Taxonomy <sup>a</sup>                                                                                                   | coverage (%) |                 | Match <sup>c</sup> |                 | Eligible <sup>d</sup> |                 | specificity (%) <sup>e</sup> |                 | outgroup_matched <sup>f</sup> |                 | outgroup_matchable <sup>g</sup> |                 |
|-------------------------------------------------------------------------------------------------------------------------|--------------|-----------------|--------------------|-----------------|-----------------------|-----------------|------------------------------|-----------------|-------------------------------|-----------------|---------------------------------|-----------------|
|                                                                                                                         | This work    | Nübel al., (13) | This work          | Nübel al., (13) | This work             | Nübel al., (13) | This work                    | Nübel al., (13) | This work                     | Nübel al., (13) | This work                       | Nübel al., (13) |
| SILVA (only NR);Bacteria;                                                                                               | 1.2          | 3.7             | 7053               | 21417           | 572584                | 575243          | 100                          | 100             | 0                             | 0               | 88051                           | 96341           |
| SILVA (only NR);Bacteria;Acetothermia;                                                                                  | 0            | 12.7            | 0                  | 21              | 165                   | 165             | 0                            | 96.8            | 7053                          | 21391           | 660470                          | 671419          |
| SILVA (only NR);Bacteria;Acidobacteria;                                                                                 | 1.7          | 30.4            | 250                | 4412            | 14486                 | 14532           | 98.9                         | 97.4            | 6803                          | 17000           | 646149                          | 657052          |
| SILVA (only NR);Bacteria;Actinobacteria;                                                                                | 0            | 0               | 3                  | 5               | 59305                 | 59486           | 98.8                         | 96.5            | 7050                          | 21407           | 601330                          | 612098          |
| SILVA (only NR);Bacteria;Armatimonadetes;                                                                               | 1.3          | 1.3             | 10                 | 10              | 748                   | 750             | 98.9                         | 96.8            | 7043                          | 21402           | 659887                          | 670834          |
| SILVA (only NR);Bacteria;Atribacteria;                                                                                  | 0            | 83.4            | 0                  | 481             | 572                   | 577             | 0                            | 96.9            | 7053                          | 20931           | 660063                          | 671007          |
| SILVA (only NR);Bacteria;BHI80-139;                                                                                     | 0            | 39              | 0                  | 16              | 41                    | 41              | 0                            | 96.8            | 7053                          | 21396           | 660594                          | 671543          |
| SILVA (only NR);Bacteria;BRC1;                                                                                          | 0            | 2.1             | 0                  | 8               | 377                   | 380             | 0                            | 96.8            | 7053                          | 21404           | 660258                          | 671204          |
| SILVA (only NR);Bacteria;Chloroflexi;                                                                                   | 2.1          | 3.3             | 192                | 307             | 9183                  | 9226            | 98.9                         | 96.8            | 6861                          | 21105           | 651452                          | 662358          |
| SILVA (only NR);Bacteria;Coprothermobacterota;                                                                          | 8.1          | 1.4             | 6                  | 1               | 74                    | 74              | 98.9                         | 96.8            | 7047                          | 21411           | 660561                          | 671510          |
| SILVA (only NR);Bacteria;Cyanobacteria;                                                                                 | 38.1         | 83.9            | 5116               | 11297           | 13434                 | 13466           | 99.7                         | 98.5            | 1937                          | 10115           | 647201                          | 658118          |
| SILVA (only NR);Bacteria;Cyanobacteria;Oxyphotobacteria;Synechococcales;Cyanobiaceae;                                   | 96.2         | 97.5            | 1714               | 1740            | 1781                  | 1785            | 99.2                         | 97.1            | 5339                          | 19672           | 658854                          | 669799          |
| SILVA (only NR);Bacteria;Cyanobacteria;Oxyphotobacteria;Synechococcales;Cyanobiaceae;Cyanobium PCC-6307;                | 97.1         | 97.7            | 628                | 635             | 647                   | 650             | 99                           | 96.9            | 6425                          | 20777           | 659988                          | 670934          |
| SILVA (only NR);Bacteria;Cyanobacteria;Oxyphotobacteria;Synechococcales;Cyanobiaceae;Prochlorococcus MIT9313;           | 95.8         | 97.6            | 431                | 440             | 450                   | 451             | 99                           | 96.9            | 6622                          | 20972           | 660185                          | 671133          |
| SILVA (only NR);Bacteria;Cyanobacteria;Oxyphotobacteria;Synechococcales;Cyanobiaceae;Synechococcus CS9902;              | 95.6         | 97.2            | 608                | 618             | 636                   | 636             | 99                           | 96.9            | 6445                          | 20794           | 659999                          | 670948          |
| SILVA (only NR);Bacteria;Cyanobacteria;Oxyphotobacteria;Synechococcales;Cyanobiaceae;Synechococcus MBI1C10613;          | 100          | 100             | 5                  | 5               | 5                     | 5               | 99.9                         | 96.8            | 7048                          | 21407           | 660630                          | 671579          |
| SILVA (only NR);Bacteria;Cyanobacteria;Oxyphotobacteria;Synechococcales;Cyanobiaceae;[Synechococcus] spongiarium group; | 97.6         | 97.6            | 41                 | 41              | 42                    | 42              | 98.9                         | 96.8            | 7012                          | 21371           | 660593                          | 671542          |
| SILVA (only NR);Bacteria;Cyanobacteria;Oxyphotobacteria;Synechococcales;                                                | 95.7         | 97.4            | 1738               | 1773            | 1817                  | 1821            | 99.2                         | 97.1            | 5315                          | 19639           | 658818                          | 669763          |
| SILVA (only NR);Bacteria;Cyanobacteria;Oxyphotobacteria;Synechococcales;Prochlorotrichaceae;                            | 63.6         | 100             | 7                  | 11              | 11                    | 11              | 98.9                         | 96.8            | 7046                          | 21401           | 660624                          | 671573          |
| SILVA (only NR);Bacteria;Cyanobacteria;Oxyphotobacteria;Synechococcales;Synechococcaceae;                               | 60           | 80              | 9                  | 12              | 15                    | 15              | 98.9                         | 96.8            | 7044                          | 21400           | 660620                          | 671569          |
| SILVA (only NR);Bacteria;Cyanobacteria;Oxyphotobacteria;Thermosynechococcales;                                          | 67.3         | 96              | 33                 | 48              | 49                    | 50              | 98.9                         | 96.8            | 7020                          | 21364           | 660586                          | 671534          |
| SILVA (only NR);Bacteria;Cyanobacteria;Oxyphotobacteria;Melainabacteria;                                                | 7.1          | 77.6            | 36                 | 396             | 506                   | 510             | 98.9                         | 96.9            | 7017                          | 21016           | 660129                          | 671074          |
| SILVA (only NR);Bacteria;Cyanobacteria;Oxyphotobacteria;                                                                | 39.5         | 84.4            | 5080               | 10869           | 12846                 | 12874           | 99.7                         | 98.4            | 1973                          | 10543           | 647789                          | 658710          |
| SILVA (only NR);Bacteria;Cyanobacteria;Oxyphotobacteria;Chloroplast;                                                    | 0.6          | 72.5            | 37                 | 4377            | 6031                  | 6040            | 98.9                         | 97.4            | 7016                          | 17035           | 654604                          | 665544          |
| SILVA (only NR);Bacteria;Cyanobacteria;Oxyphotobacteria;Euryococcales;                                                  | 68.9         | 93.3            | 31                 | 42              | 45                    | 45              | 98.9                         | 96.8            | 7022                          | 21370           | 660590                          | 671539          |
| SILVA (only NR);Bacteria;Cyanobacteria;Oxyphotobacteria;Fr127;                                                          | 100          | 100             | 4                  | 4               | 4                     | 4               | 98.9                         | 96.8            | 7049                          | 21408           | 660631                          | 671580          |
| SILVA (only NR);Bacteria;Cyanobacteria;Oxyphotobacteria;Gelitinernematales;                                             | 100          | 100             | 1                  | 1               | 1                     | 1               | 98.9                         | 96.8            | 7052                          | 21411           | 660634                          | 671583          |
| SILVA (only NR);Bacteria;Cyanobacteria;Oxyphotobacteria;Gloeobacteriales;                                               | 12.5         | 100             | 1                  | 8               | 8                     | 8               | 98.9                         | 96.8            | 7052                          | 21404           | 660627                          | 671576          |
| SILVA (only NR);Bacteria;Cyanobacteria;Oxyphotobacteria;Leptolyngbyales;                                                | 78.1         | 95.9            | 153                | 189             | 196                   | 197             | 99                           | 96.8            | 6900                          | 21223           | 660439                          | 671387          |
| SILVA (only NR);Bacteria;Cyanobacteria;Oxyphotobacteria;Limnoltrichales;                                                | 11.8         | 94.1            | 2                  | 16              | 17                    | 17              | 98.9                         | 96.8            | 7051                          | 21396           | 660618                          | 671567          |
| SILVA (only NR);Bacteria;Cyanobacteria;Oxyphotobacteria;Neosynechococcales;                                             | 100          | 100             | 1                  | 1               | 1                     | 1               | 98.9                         | 96.8            | 7052                          | 21411           | 660634                          | 671583          |
| SILVA (only NR);Bacteria;Cyanobacteria;Oxyphotobacteria;Nostocales;                                                     | 65.3         | 93.4            | 2455               | 3521            | 3757                  | 3768            | 99.3                         | 97.3            | 4598                          | 17891           | 658788                          | 667816          |
| SILVA (only NR);Bacteria;Cyanobacteria;Oxyphotobacteria;Uncultured Sedi;                                                | 79.7         | 96              | 393                | 475             | 493                   | 495             | 99                           | 96.9            | 6660                          | 20937           | 660142                          | 671089          |
| SILVA (only NR);Bacteria;Cyanobacteria;Oxyphotobacteria;Phormidemiales;                                                 | 62.5         | 96.9            | 182                | 282             | 291                   | 291             | 99                           | 96.9            | 6871                          | 21130           | 660344                          | 671293          |
| SILVA (only NR);Bacteria;Cyanobacteria;Oxyphotobacteria;Pseudanabaenales;                                               | 16.7         | 97.1            | 17                 | 99              | 102                   | 102             | 98.9                         | 96.8            | 7036                          | 21313           | 660533                          | 671482          |
| SILVA (only NR);Bacteria;Cyanobacteria;Oxyphotobacteria;RD011;                                                          | 100          | 87.5            | 8                  | 7               | 8                     | 8               | 98.9                         | 96.8            | 7045                          | 21405           | 660627                          | 671576          |
| SILVA (only NR);Bacteria;Cyanobacteria;Oxyphotobacteria;RD017;                                                          | 100          | 100             | 12                 | 12              | 12                    | 12              | 98.9                         | 96.8            | 7041                          | 21400           | 660623                          | 671572          |
| SILVA (only NR);Bacteria;Cyanobacteria;Oxyphotobacteria;SepB-3;                                                         | 100          | 100             | 8                  | 8               | 8                     | 8               | 98.9                         | 96.8            | 7045                          | 21404           | 660627                          | 671576          |
| SILVA (only NR);Bacteria;Cyanobacteria;Oxyphotobacteria;uncultured;                                                     | 75           | 100             | 3                  | 4               | 4                     | 4               | 98.9                         | 96.8            | 7050                          | 21408           | 660631                          | 671580          |
| SILVA (only NR);Bacteria;Cyanobacteria;Sericytochromatia;                                                               | 0            | 39              | 0                  | 32              | 82                    | 82              | 0                            | 96.8            | 7053                          | 21380           | 660553                          | 671502          |
| SILVA (only NR);Bacteria;Deferribacteres;                                                                               | 0            | 0.8             | 0                  | 1               | 129                   | 130             | 0                            | 96.8            | 7053                          | 21411           | 660506                          | 671454          |
| SILVA (only NR);Bacteria;Dependentiae;                                                                                  | 0            | 1.2             | 0                  | 7               | 575                   | 580             | 0                            | 96.8            | 7053                          | 21405           | 660606                          | 671004          |
| SILVA (only NR);Bacteria;Dictyoglomi;                                                                                   | 0            | 100             | 0                  | 9               | 9                     | 9               | 0                            | 96.8            | 7053                          | 21403           | 660626                          | 671575          |
| SILVA (only NR);Bacteria;Elusimicrobia;                                                                                 | 0            | 0.2             | 0                  | 1               | 431                   | 435             | 0                            | 96.8            | 7053                          | 21411           | 660204                          | 671149          |
| SILVA (only NR);Bacteria;FCPU426;                                                                                       | 2.7          | 37.8            | 1                  | 14              | 37                    | 37              | 98.9                         | 96.8            | 7052                          | 21398           | 660598                          | 671547          |
| SILVA (only NR);Bacteria;Firmicutes;                                                                                    | 0.7          | 2.1             | 951                | 3025            | 143134                | 144049          | 98.8                         | 96.5            | 6102                          | 18387           | 517501                          | 527535          |
| SILVA (only NR);Bacteria;Fusobacteria;                                                                                  | 0            | 0               | 1                  | 0               | 2163                  | 2177            | 98.9                         | 0               | 7052                          | 21412           | 658472                          | 669407          |
| SILVA (only NR);Bacteria;GN01;                                                                                          | 0.9          | 0               | 1                  | 0               | 115                   | 120             | 98.9                         | 0               | 7052                          | 21412           | 660520                          | 671464          |
| SILVA (only NR);Bacteria;Halanaerobiaeota;                                                                              | 0            | 62.5            | 0                  | 158             | 253                   | 253             | 0                            | 96.8            | 7053                          | 21254           | 660382                          | 671331          |
| SILVA (only NR);Bacteria;Hydrogenedentes;                                                                               | 0.4          | 0.4             | 1                  | 1               | 270                   | 271             | 98.9                         | 96.8            | 7052                          | 21411           | 660365                          | 671313          |
| SILVA (only NR);Bacteria;Margulisbacteria;                                                                              | 0            | 14              | 0                  | 12              | 86                    | 86              | 0                            | 96.8            | 7053                          | 21400           | 660549                          | 671498          |
| SILVA (only NR);Bacteria;Marinimicrobia[SAR406 clade];                                                                  | 0            | 0.2             | 0                  | 1               | 553                   | 554             | 0                            | 96.8            | 7053                          | 21411           | 660082                          | 671030          |
| SILVA (only NR);Bacteria;Modulibacteria;                                                                                | 0            | 82.4            | 0                  | 210             | 253                   | 255             | 0                            | 96.8            | 7053                          | 21202           | 660382                          | 671329          |
| SILVA (only NR);Bacteria;Nitrospirae;                                                                                   | 0.3          | 87.9            | 1                  | 320             | 363                   | 364             | 98.9                         | 96.9            | 7052                          | 21092           | 660272                          | 671220          |
| SILVA (only NR);Bacteria;Nitrospirae;                                                                                   | 0            | 0.5             | 0                  | 7               | 1288                  | 1294            | 0                            | 96.8            | 7053                          | 21405           | 659347                          | 670290          |
| SILVA (only NR);Bacteria;Patescibacteria;                                                                               | 0.2          | 8.6             | 8                  | 390             | 4507                  | 4521            | 98.9                         | 96.8            | 7045                          | 21022           | 656128                          | 667063          |
| SILVA (only NR);Bacteria;Planctomycetes;                                                                                | 3.7          | 0.1             | 327                | 11              | 8956                  | 9001            | 99                           | 96.8            | 6726                          | 21401           | 651679                          | 662583          |
| SILVA (only NR);Bacteria;Proteobacteria;                                                                                | 0            | 0.1             | 2                  | 194             | 228791                | 229791          | 98.4                         | 95.2            | 7051                          | 21218           | 431844                          | 441793          |
| SILVA (only NR);Bacteria;Rokubacteria;                                                                                  | 0.5          | 88.2            | 2                  | 335             | 380                   | 380             | 98.9                         | 96.9            | 7051                          | 21077           | 660255                          | 671204          |
| SILVA (only NR);Bacteria;Schekmanbacteria;                                                                              | 0            | 72.5            | 0                  | 29              | 40                    | 40              | 0                            | 96.8            | 7053                          | 21383           | 660595                          | 671544          |
| SILVA (only NR);Bacteria;Spirochaetes;                                                                                  | 0            | 0               | 1                  | 0               | 4181                  | 4200            | 98.9                         | 0               | 7052                          | 21412           | 656454                          | 667384          |
| SILVA (only NR);Bacteria;Synergistetes;                                                                                 | 0.2          | 5               | 2                  | 57              | 1137                  | 1138            | 98.9                         | 96.8            | 7051                          | 21355           | 659498                          | 670446          |
| SILVA (only NR);Bacteria;Tenericutes;                                                                                   | 0            | 0.3             | 0                  | 7               | 2480                  | 2497            | 0                            | 96.8            | 7053                          | 21405           | 658155                          | 669087          |
| SILVA (only NR);Bacteria;Thermotogae;                                                                                   | 0.3          | 4.5             | 1                  | 13              | 291                   | 292             | 98.9                         | 96.8            | 7052                          | 21399           | 660344                          | 671292          |
| SILVA (only NR);Bacteria;Verrucomicrobia;                                                                               | 4            | 0.1             | 176                | 4               | 4385                  | 4411            | 99                           | 96.8            | 6877                          | 21408           | 656250                          | 667173          |
| SILVA (only NR);Bacteria;WOR-1;                                                                                         | 0            | 79.4            | 0                  | 27              | 34                    | 34              | 0                            | 96.8            | 7053                          | 21385           | 660601                          | 671550          |
| SILVA (only NR);Bacteria;WPS-2;                                                                                         | 2            | 49              | 1                  | 25              | 51                    | 51              | 98.9                         | 96.8            | 7052                          | 21387           | 660584                          | 671533          |
| SILVA (only NR);Bacteria;WPS1;                                                                                          | 0            | 1.1             | 0                  | 1               | 93                    | 93              | 0                            | 96.8            | 7053                          | 21411           | 660542                          | 671491          |
| SILVA (only NR);Eukaryota;                                                                                              | 0            | 0               | 0                  | 3               | 72786                 | 72420           | 0                            | 96.4            | 7053                          | 21409           | 587849                          | 599164          |

a= SILVAtaxonomy, SSU r132 database; RefNR Sequence Collection

b={match/eligible}\*100

c=number of match hits in the taxa path.

d=number of hits withsequence data at the primers position in the taxa path

e=100-{outgroup\_matches/outgroup\_matchable}\*100

f=number of matched hits outside the taxonomic path

g=number of matchable hits outside the taxonomic path

**Table S4:** In silico evaluation of specificity and coverage rate of primer pairs proposed by Herlemann et al., (14) allowing zero mismatch.

| Taxonomy <sup>a</sup>                                                                              | coverage (%) <sup>b</sup> | Match <sup>c</sup> | Eligible <sup>d</sup> | specificity (%) <sup>e</sup> | outgroup matched <sup>f</sup> | outgroup matchable <sup>g</sup> |
|----------------------------------------------------------------------------------------------------|---------------------------|--------------------|-----------------------|------------------------------|-------------------------------|---------------------------------|
| Archaea;                                                                                           | 0.6                       | 136                | 23664                 | 23                           | 647372                        | 498332                          |
| Bacteria;                                                                                          | 86.6                      | 498339             | 575236                | 99.9                         | 95800                         | 129                             |
| Bacteria;Acetothermia;                                                                             | 22.4                      | 37                 | 165                   | 25.7                         | 670871                        | 498431                          |
| Bacteria;Acidobacteria;                                                                            | 92.0                      | 13371              | 14532                 | 26.1                         | 656504                        | 485097                          |
| Bacteria;Actinobacteria;                                                                           | 82.4                      | 49010              | 59486                 | 26.5                         | 611550                        | 449458                          |
| Bacteria;Aerophobetes;                                                                             | 3.0                       | 2                  | 66                    | 25.7                         | 670970                        | 498466                          |
| Bacteria;Anck6;                                                                                    | 4.8                       | 1                  | 21                    | 25.7                         | 671015                        | 498467                          |
| Bacteria;Aquificae;                                                                                | 89.3                      | 301                | 337                   | 25.7                         | 670699                        | 498167                          |
| Bacteria;Armatimonadetes;                                                                          | 30.9                      | 232                | 750                   | 25.7                         | 670286                        | 498236                          |
| Bacteria;Bacteroidetes;                                                                            | 89.8                      | 49639              | 55295                 | 27.1                         | 615741                        | 448829                          |
| Bacteria;BH180-139;                                                                                | 92.7                      | 38                 | 41                    | 25.7                         | 670995                        | 498430                          |
| Bacteria;BRC1;                                                                                     | 87.6                      | 333                | 380                   | 25.7                         | 670656                        | 498135                          |
| Bacteria;Caldiserica;                                                                              | 91.6                      | 87                 | 95                    | 25.7                         | 670941                        | 498381                          |
| Bacteria;Calditrichaeota;                                                                          | 85.8                      | 236                | 275                   | 25.7                         | 670761                        | 498232                          |
| Bacteria;Chlamydiae;                                                                               | 82.8                      | 323                | 390                   | 25.7                         | 670646                        | 498145                          |
| Bacteria;Chloroflexi;                                                                              | 39.0                      | 3595               | 9226                  | 25.2                         | 661810                        | 494873                          |
| Bacteria;Chrysiogenetes;                                                                           | 90.0                      | 9                  | 10                    | 25.7                         | 671026                        | 498459                          |
| Bacteria;CK-2C2-2;                                                                                 | 81.0                      | 17                 | 21                    | 25.7                         | 671015                        | 498451                          |
| Bacteria;Clociminetes;                                                                             | 82.3                      | 247                | 300                   | 25.7                         | 670736                        | 498221                          |
| Bacteria;Coprothermobacteraeota;                                                                   | 82.4                      | 61                 | 74                    | 25.7                         | 670962                        | 498407                          |
| Bacteria;Cyanobacteria;                                                                            | 76.2                      | 10255              | 13465                 | 25.8                         | 657571                        | 488213                          |
| Bacteria;Cyanobacteria;Melainabacteria;                                                            | 84.7                      | 432                | 510                   | 25.7                         | 670526                        | 498036                          |
| Bacteria;Cyanobacteria;Oxyphotobacteria;                                                           | 75.8                      | 9764               | 12873                 | 25.7                         | 658163                        | 488704                          |
| Bacteria;Cyanobacteria;Oxyphotobacteria;Chloroplast;                                               | 57.3                      | 3462               | 6039                  | 25.6                         | 664997                        | 495006                          |
| Bacteria;Cyanobacteria;Oxyphotobacteria;Eurycoccales;                                              | 86.7                      | 39                 | 45                    | 25.7                         | 670991                        | 498429                          |
| Bacteria;Cyanobacteria;Oxyphotobacteria;Eurycoccales;Leptococaceae;                                | 93.8                      | 15                 | 16                    | 25.7                         | 671020                        | 498453                          |
| Bacteria;Cyanobacteria;Oxyphotobacteria;Eurycoccales;uncultured;                                   | 90.0                      | 9                  | 10                    | 25.7                         | 671026                        | 498459                          |
| Bacteria;Cyanobacteria;Oxyphotobacteria;Fr127;                                                     | 75.0                      | 3                  | 4                     | 25.7                         | 671032                        | 498465                          |
| Bacteria;Cyanobacteria;Oxyphotobacteria;Geltierinematales;                                         | 100.0                     | 1                  | 1                     | 25.7                         | 671035                        | 498467                          |
| Bacteria;Cyanobacteria;Oxyphotobacteria;Gloeobacterales;                                           | 100.0                     | 8                  | 8                     | 25.7                         | 671028                        | 498460                          |
| Bacteria;Cyanobacteria;Oxyphotobacteria;Leptolyngbales;                                            | 93.4                      | 184                | 197                   | 25.7                         | 670839                        | 498284                          |
| Bacteria;Cyanobacteria;Oxyphotobacteria;Limnitrichales;                                            | 94.1                      | 16                 | 17                    | 25.7                         | 671019                        | 498452                          |
| Bacteria;Cyanobacteria;Oxyphotobacteria;Neosynechococcales;                                        | 100.0                     | 1                  | 1                     | 25.7                         | 671035                        | 498467                          |
| Bacteria;Cyanobacteria;Oxyphotobacteria;Nostocales;                                                | 91.8                      | 3460               | 3768                  | 25.8                         | 667268                        | 495008                          |
| Bacteria;Cyanobacteria;Oxyphotobacteria;Oxyphotobacteria Incertae Sedis;                           | 90.9                      | 450                | 495                   | 25.7                         | 670541                        | 498018                          |
| Bacteria;Cyanobacteria;Oxyphotobacteria;Phormidismiales;                                           | 91.8                      | 267                | 291                   | 25.7                         | 670745                        | 498201                          |
| Bacteria;Cyanobacteria;Oxyphotobacteria;Pseudanabaenales;                                          | 95.1                      | 97                 | 102                   | 25.7                         | 670934                        | 498371                          |
| Bacteria;Cyanobacteria;Oxyphotobacteria;RD011;                                                     | 87.5                      | 7                  | 8                     | 25.7                         | 671028                        | 498461                          |
| Bacteria;Cyanobacteria;Oxyphotobacteria;RD017;                                                     | 83.3                      | 10                 | 12                    | 25.7                         | 671024                        | 498458                          |
| Bacteria;Cyanobacteria;Oxyphotobacteria;SepB-3;                                                    | 87.5                      | 7                  | 8                     | 25.7                         | 671028                        | 498461                          |
| Bacteria;Cyanobacteria;Oxyphotobacteria;Synchococcales;                                            | 93.4                      | 1700               | 1821                  | 25.8                         | 669215                        | 496768                          |
| Bacteria;Cyanobacteria;Oxyphotobacteria;Synchococcales;Cyanobiaceae;                               | 93.4                      | 1667               | 1785                  | 25.8                         | 669251                        | 496801                          |
| Bacteria;Cyanobacteria;Oxyphotobacteria;Synchococcales;Cyanobiaceae;Cyanobium PCC-6307;            | 93.5                      | 608                | 650                   | 25.7                         | 670386                        | 497860                          |
| Bacteria;Cyanobacteria;Oxyphotobacteria;Synchococcales;Cyanobiaceae;Prochlorococcus MIT9313;       | 95.1                      | 429                | 451                   | 25.7                         | 670585                        | 498039                          |
| Bacteria;Cyanobacteria;Oxyphotobacteria;Synchococcales;Cyanobiaceae;Synchococcus CC3902;           | 93.1                      | 592                | 636                   | 25.7                         | 670400                        | 497876                          |
| Bacteria;Cyanobacteria;Oxyphotobacteria;Synchococcales;Cyanobiaceae;Synchococcus MBIC10613;        | 80.0                      | 4                  | 5                     | 25.7                         | 671031                        | 498464                          |
| Bacteria;Cyanobacteria;Oxyphotobacteria;Synchococcales;Cyanobiaceae;[Synchococcus] spongium group; | 78.6                      | 33                 | 42                    | 25.7                         | 670994                        | 498435                          |
| Bacteria;Cyanobacteria;Oxyphotobacteria;Synchococcales;Prochlororhithaceae;                        | 100.0                     | 11                 | 11                    | 25.7                         | 671025                        | 498457                          |
| Bacteria;Cyanobacteria;Oxyphotobacteria;Synchococcales;Synchococaceae;                             | 80.0                      | 12                 | 15                    | 25.7                         | 671021                        | 498456                          |
| Bacteria;Cyanobacteria;Oxyphotobacteria;Thermosynechococcales;                                     | 94.0                      | 47                 | 50                    | 25.7                         | 670986                        | 498421                          |
| Bacteria;Cyanobacteria;Oxyphotobacteria;uncultured;                                                | 100.0                     | 4                  | 4                     | 25.7                         | 671032                        | 498464                          |
| Bacteria;Cyanobacteria;Sericotychromatia;                                                          | 72.0                      | 59                 | 82                    | 25.7                         | 670954                        | 498409                          |
| Bacteria;Dadabacteria;                                                                             | 90.5                      | 153                | 169                   | 25.7                         | 670867                        | 498315                          |
| Bacteria;Deferribacteres;                                                                          | 93.1                      | 121                | 130                   | 25.7                         | 670906                        | 498347                          |
| Bacteria;Deinococcus-Thermus;                                                                      | 92.9                      | 849                | 914                   | 25.7                         | 670122                        | 497619                          |
| Bacteria;Dependentiae;                                                                             | 93.3                      | 541                | 580                   | 25.7                         | 670456                        | 497927                          |
| Bacteria;Desantibacteria;                                                                          | 100.0                     | 2                  | 2                     | 25.7                         | 671034                        | 498466                          |
| Bacteria;Dictyoglomi;                                                                              | 100.0                     | 9                  | 9                     | 25.7                         | 671027                        | 498459                          |
| Bacteria;Edwardsbacteria;                                                                          | 25.0                      | 1                  | 4                     | 25.7                         | 671032                        | 498467                          |
| Bacteria;Elusimicrobia;                                                                            | 84.8                      | 369                | 435                   | 25.7                         | 670601                        | 498099                          |
| Bacteria;Entotheonellaeota;                                                                        | 88.1                      | 148                | 168                   | 25.7                         | 670868                        | 498320                          |
| Bacteria;Epsilonbacteraeota;                                                                       | 93.9                      | 4852               | 5167                  | 25.9                         | 665869                        | 493616                          |
| Bacteria;FBP;                                                                                      | 85.8                      | 133                | 155                   | 25.7                         | 670881                        | 498335                          |
| Bacteria;FCPU426;                                                                                  | 83.8                      | 31                 | 37                    | 25.7                         | 670999                        | 498437                          |
| Bacteria;Fervidibacteria;                                                                          | 100.0                     | 4                  | 4                     | 25.7                         | 671032                        | 498464                          |
| Bacteria;Fibrobacteres;                                                                            | 82.9                      | 619                | 747                   | 25.7                         | 670289                        | 497849                          |
| Bacteria;Firestonebacteria;                                                                        | 100.0                     | 3                  | 3                     | 25.7                         | 671033                        | 498465                          |
| Bacteria;Firmicutes;                                                                               | 88.2                      | 127119             | 144048                | 29.5                         | 526988                        | 371349                          |
| Bacteria;Fusobacteria;                                                                             | 87.1                      | 1896               | 2177                  | 25.8                         | 668859                        | 496572                          |
| Bacteria;Fusobacteria;Fusobacteria;                                                                | 87.1                      | 1896               | 2177                  | 25.8                         | 668859                        | 496572                          |
| Bacteria;GALL5;                                                                                    | 90.7                      | 39                 | 43                    | 25.7                         | 670993                        | 498429                          |
| Bacteria;GBS-1;                                                                                    | 100.0                     | 2                  | 2                     | 25.7                         | 671034                        | 498466                          |
| Bacteria;Gemmatimonadetes;                                                                         | 89.6                      | 1957               | 2184                  | 25.8                         | 668852                        | 496511                          |
| Bacteria;GN01;                                                                                     | 3.3                       | 4                  | 120                   | 25.7                         | 670916                        | 498464                          |
| Bacteria;Halanaerobiaeota;                                                                         | 75.5                      | 191                | 253                   | 25.7                         | 670783                        | 498277                          |
| Bacteria;Hydrogenedentes;                                                                          | 87.5                      | 237                | 271                   | 25.7                         | 670765                        | 498231                          |
| Bacteria;Hydrothermae;                                                                             | 44.7                      | 17                 | 38                    | 25.7                         | 670998                        | 498451                          |
| Bacteria;Kiritimatiellaeota;                                                                       | 79.4                      | 774                | 975                   | 25.7                         | 670061                        | 497694                          |
| Bacteria;Latescibacteria;                                                                          | 85.9                      | 426                | 496                   | 25.7                         | 670540                        | 498042                          |
| Bacteria;LCP-89;                                                                                   | 82.6                      | 38                 | 46                    | 25.7                         | 670990                        | 498430                          |
| Bacteria;Lentisphaerae;                                                                            | 81.0                      | 380                | 469                   | 25.7                         | 670567                        | 498088                          |
| Bacteria;Margulisbacteria;                                                                         | 87.2                      | 75                 | 86                    | 25.7                         | 670950                        | 498393                          |
| Bacteria;Marinimicrobia (SAR406 clade);                                                            | 59.9                      | 332                | 554                   | 25.7                         | 670482                        | 498136                          |
| Bacteria;MAT-CR-M4-B07;                                                                            | 56.0                      | 14                 | 25                    | 25.7                         | 671011                        | 498454                          |
| Bacteria;Modulibacteria;                                                                           | 85.1                      | 217                | 255                   | 25.7                         | 670781                        | 498251                          |
| Bacteria;Nitrospinae;                                                                              | 67.0                      | 244                | 364                   | 25.7                         | 670672                        | 498224                          |
| Bacteria;Omnitrophicaeota;                                                                         | 61.7                      | 313                | 507                   | 25.7                         | 670529                        | 498155                          |
| Bacteria;Patescibacteria;                                                                          | 58.5                      | 2647               | 4521                  | 25.6                         | 666515                        | 495821                          |
| Bacteria;PAUC34f;                                                                                  | 1.1                       | 1                  | 88                    | 25.7                         | 670948                        | 498467                          |
| Bacteria;Planctomycetes;                                                                           | 73.5                      | 6617               | 9001                  | 25.7                         | 662035                        | 491851                          |
| Bacteria;Poribacteria;                                                                             | 42.9                      | 21                 | 49                    | 25.7                         | 670987                        | 498447                          |
| Bacteria;Proteobacteria;                                                                           | 90.0                      | 206746             | 229787                | 33.9                         | 441249                        | 291722                          |
| Bacteria;Rokubacteria;                                                                             | 90.3                      | 343                | 380                   | 25.7                         | 670656                        | 498125                          |
| Bacteria;RSa#F231;                                                                                 | 100.0                     | 8                  | 8                     | 25.7                         | 671028                        | 498460                          |
| Bacteria;Schekmanbacteria;                                                                         | 92.5                      | 37                 | 40                    | 25.7                         | 670996                        | 498431                          |
| Bacteria;Spirochaetes;                                                                             | 75.7                      | 3179               | 4200                  | 25.7                         | 666836                        | 495289                          |
| Bacteria;Synergistetes;                                                                            | 90.1                      | 1025               | 1138                  | 25.7                         | 669898                        | 497443                          |
| Bacteria;TA06;                                                                                     | 88.2                      | 60                 | 68                    | 25.7                         | 670968                        | 498408                          |
| Bacteria;Tenericutes;                                                                              | 64.2                      | 1604               | 2497                  | 25.7                         | 668539                        | 496864                          |
| Bacteria;Thermosulfidibacteraeota;                                                                 | 100.0                     | 3                  | 3                     | 25.7                         | 671033                        | 498465                          |
| Bacteria;Thermotogae;                                                                              | 91.8                      | 268                | 292                   | 25.7                         | 670744                        | 498200                          |
| Bacteria;uncultured;                                                                               | 100.0                     | 5                  | 5                     | 25.7                         | 671031                        | 498463                          |
| Bacteria;Verrucomicrobia;                                                                          | 87.3                      | 3852               | 4411                  | 25.8                         | 666625                        | 494616                          |
| Bacteria;WOR-1;                                                                                    | 91.2                      | 31                 | 34                    | 25.7                         | 671002                        | 498437                          |
| Bacteria;WPS-2;                                                                                    | 86.3                      | 44                 | 51                    | 25.7                         | 670985                        | 498424                          |
| Bacteria;WS1;                                                                                      | 3.2                       | 3                  | 93                    | 25.7                         | 670943                        | 498465                          |
| Bacteria;WS2;                                                                                      | 77.6                      | 45                 | 58                    | 25.7                         | 670978                        | 498423                          |
| Bacteria;WS4;                                                                                      | 37.5                      | 6                  | 16                    | 25.7                         | 671020                        | 498462                          |
| Bacteria;Zixibacteria;                                                                             | 88.7                      | 180                | 203                   | 25.7                         | 670833                        | 498288                          |
| Eukaryota;                                                                                         | 0.0                       | 2                  | 72163                 | 16.8                         | 598873                        | 498466                          |

a= SILVA taxonomy, SSU r132 database; RefNR Sequence Collection

b=(match/eeligible)\*100

c=number of match hits in the taxa path.

d=number of hits whitthissequence data at the primers position in the taxa path

e=100\*(outgroup\_matches/outgroup\_matchable)\*100

f=number of matched hits outside the taxonomic path

g=number of matchable hits outside the taxonomic path

**Table S5:** In silico evaluation of specificity and coverage rate of primer pairs proposed by Herlemann et al., (14) allowing one mismatch.

| Taxonomy *                                                                                           | coverage (%) <sup>b</sup> | Match <sup>c</sup> | Eligible <sup>d</sup> | specificity (%) <sup>e</sup> | outgroup matched <sup>f</sup> | outgroup matchable |
|------------------------------------------------------------------------------------------------------|---------------------------|--------------------|-----------------------|------------------------------|-------------------------------|--------------------|
| Archaea;                                                                                             | 66.8                      | 15806              | 23664                 | 15.9                         | 647372                        | 544446             |
| Bacteria;Acetothermia;                                                                               | 94.6                      | 544429             | 575236                | 83.5                         | 95800                         | 15823              |
| Bacteria;Acidobacteria;                                                                              | 95.2                      | 157                | 165                   | 16.5                         | 670871                        | 560095             |
| Bacteria;Actinobacteria;                                                                             | 96.0                      | 13944              | 14532                 | 16.8                         | 656504                        | 546308             |
| Bacteria;Aegifibacteria;                                                                             | 95.8                      | 56981              | 59486                 | 17.7                         | 611550                        | 503271             |
| Bacteria;Aerophobetes;                                                                               | 94.2                      | 49                 | 52                    | 16.5                         | 670984                        | 560203             |
| Bacteria;Anck6;                                                                                      | 92.4                      | 61                 | 66                    | 16.5                         | 670970                        | 560191             |
| Bacteria;Aquilifae;                                                                                  | 100.0                     | 21                 | 21                    | 16.5                         | 671015                        | 560231             |
| Bacteria;Armatimonadetes;                                                                            | 95.5                      | 322                | 337                   | 16.5                         | 670699                        | 559930             |
| Bacteria;Atribacteria;                                                                               | 77.3                      | 580                | 750                   | 16.5                         | 670286                        | 559672             |
| Bacteria;Bacteroidetes;                                                                              | 93.9                      | 542                | 577                   | 16.5                         | 670459                        | 559710             |
| Bacteria;BH180-139;                                                                                  | 95.4                      | 52766              | 55295                 | 17.6                         | 615741                        | 507486             |
| Bacteria;BR1;                                                                                        | 95.1                      | 39                 | 41                    | 16.5                         | 670995                        | 560213             |
| Bacteria;BR1;                                                                                        | 96.1                      | 365                | 380                   | 16.5                         | 670656                        | 559887             |
| Bacteria;Caldiserica;                                                                                | 95.8                      | 91                 | 95                    | 16.5                         | 670941                        | 560161             |
| Bacteria;Calditrichaeota;                                                                            | 89.5                      | 246                | 275                   | 16.5                         | 670761                        | 560006             |
| Bacteria;Calescamantes;                                                                              | 100.0                     | 3                  | 3                     | 16.5                         | 671033                        | 560249             |
| Bacteria;Chlamydiae;                                                                                 | 86.7                      | 338                | 390                   | 16.5                         | 670646                        | 559914             |
| Bacteria;Chloroflexi;                                                                                | 81.8                      | 7548               | 9226                  | 16.5                         | 661810                        | 552704             |
| Bacteria;Chrysiogenetes;                                                                             | 100.0                     | 10                 | 10                    | 16.5                         | 671026                        | 560242             |
| Bacteria;CK-2C2-2;                                                                                   | 90.5                      | 19                 | 21                    | 16.5                         | 671015                        | 560233             |
| Bacteria;Cloacimonetes;                                                                              | 94.0                      | 282                | 300                   | 16.5                         | 670736                        | 559970             |
| Bacteria;Coprothermobacteraeota;                                                                     | 85.1                      | 63                 | 74                    | 16.5                         | 670962                        | 560189             |
| Bacteria;Cyanobacteria;                                                                              | 89.1                      | 12000              | 13465                 | 16.6                         | 657571                        | 548252             |
| Bacteria;Cyanobacteria;Melainobacteria;                                                              | 88.2                      | 450                | 510                   | 16.5                         | 670526                        | 559802             |
| Bacteria;Cyanobacteria;Oxyphotobacteria;                                                             | 89.2                      | 11487              | 12873                 | 16.6                         | 658163                        | 548765             |
| Bacteria;Cyanobacteria;Oxyphotobacteria;Chloroplast;                                                 | 81.2                      | 4906               | 6039                  | 16.5                         | 664997                        | 555346             |
| Bacteria;Cyanobacteria;Oxyphotobacteria;Eurycoccales;                                                | 97.8                      | 44                 | 45                    | 16.5                         | 670991                        | 560208             |
| Bacteria;Cyanobacteria;Oxyphotobacteria;Fr127;                                                       | 100.0                     | 4                  | 4                     | 16.5                         | 671032                        | 560248             |
| Bacteria;Cyanobacteria;Oxyphotobacteria;Geitlerinematales;                                           | 100.0                     | 1                  | 1                     | 16.5                         | 671035                        | 560251             |
| Bacteria;Cyanobacteria;Oxyphotobacteria;Gloeobacterales;                                             | 100.0                     | 8                  | 8                     | 16.5                         | 671028                        | 560244             |
| Bacteria;Cyanobacteria;Oxyphotobacteria;Leptolyngbyales;                                             | 97.0                      | 191                | 197                   | 16.5                         | 670839                        | 560061             |
| Bacteria;Cyanobacteria;Oxyphotobacteria;Limntrichales;                                               | 94.1                      | 16                 | 17                    | 16.5                         | 671019                        | 560236             |
| Bacteria;Cyanobacteria;Oxyphotobacteria;Neosynechococcales;                                          | 100.0                     | 1                  | 1                     | 16.5                         | 671035                        | 560251             |
| Bacteria;Cyanobacteria;Oxyphotobacteria;Nostocales;                                                  | 95.3                      | 3592               | 3768                  | 16.6                         | 667268                        | 556660             |
| Bacteria;Cyanobacteria;Oxyphotobacteria;Oxyphotobacteria Incertae Sedis;                             | 96.2                      | 476                | 495                   | 16.5                         | 670541                        | 559776             |
| Bacteria;Cyanobacteria;Oxyphotobacteria;Phormidemiales;                                              | 97.3                      | 283                | 291                   | 16.5                         | 670745                        | 559969             |
| Bacteria;Cyanobacteria;Oxyphotobacteria;Pseudanabaenales;                                            | 99.0                      | 101                | 102                   | 16.5                         | 670934                        | 560151             |
| Bacteria;Cyanobacteria;Oxyphotobacteria;RD011;                                                       | 87.5                      | 7                  | 8                     | 16.5                         | 671028                        | 560245             |
| Bacteria;Cyanobacteria;Oxyphotobacteria;RD017;                                                       | 100.0                     | 12                 | 12                    | 16.5                         | 671024                        | 560240             |
| Bacteria;Cyanobacteria;Oxyphotobacteria;SepB-3;                                                      | 100.0                     | 8                  | 8                     | 16.5                         | 671028                        | 560244             |
| Bacteria;Cyanobacteria;Oxyphotobacteria;Synchococcales;                                              | 98.0                      | 1784               | 1821                  | 16.5                         | 669215                        | 558468             |
| Bacteria;Cyanobacteria;Oxyphotobacteria;Synchococcales;Cyanobiaceae;                                 | 98.0                      | 1749               | 1785                  | 16.5                         | 669251                        | 558503             |
| Bacteria;Cyanobacteria;Oxyphotobacteria;Synchococcales;Cyanobiaceae;Cyanobium PCC-6307;              | 97.8                      | 636                | 650                   | 16.5                         | 670386                        | 559616             |
| Bacteria;Cyanobacteria;Oxyphotobacteria;Synchococcales;Cyanobiaceae;Prochlorococcus MIT9313;         | 98.2                      | 443                | 451                   | 16.5                         | 670585                        | 559809             |
| Bacteria;Cyanobacteria;Oxyphotobacteria;Synchococcales;Cyanobiaceae;Synchococcus CC9902;             | 98.0                      | 623                | 636                   | 16.5                         | 670400                        | 559629             |
| Bacteria;Cyanobacteria;Oxyphotobacteria;Synchococcales;Cyanobiaceae;Synchococcus MBIC10613;          | 100.0                     | 5                  | 5                     | 16.5                         | 671031                        | 560247             |
| Bacteria;Cyanobacteria;Oxyphotobacteria;Synchococcales;Cyanobiaceae;[Synchococcus] spongiarum group; | 97.6                      | 41                 | 42                    | 16.5                         | 670994                        | 560211             |
| Bacteria;Cyanobacteria;Oxyphotobacteria;Synchococcales;Prochlorotracheaceae;                         | 100.0                     | 11                 | 11                    | 16.5                         | 671025                        | 560241             |
| Bacteria;Cyanobacteria;Oxyphotobacteria;Synchococcales;Prochlorotracheaceae;                         | 93.3                      | 14                 | 15                    | 16.5                         | 671021                        | 560238             |
| Bacteria;Cyanobacteria;Oxyphotobacteria;Synchococcales;Synchococcaceae;                              | 96.0                      | 48                 | 50                    | 16.5                         | 670986                        | 560204             |
| Bacteria;Cyanobacteria;Oxyphotobacteria;uncultured;                                                  | 100.0                     | 4                  | 4                     | 16.5                         | 671032                        | 560248             |
| Bacteria;Cyanobacteria;Sericytochromatia;                                                            | 76.8                      | 63                 | 82                    | 16.5                         | 670954                        | 560189             |
| Bacteria;Dadabacteria;                                                                               | 94.7                      | 160                | 169                   | 16.5                         | 670867                        | 560092             |
| Bacteria;Deferribacteres;                                                                            | 96.2                      | 125                | 130                   | 16.5                         | 670906                        | 560127             |
| Bacteria;Deinococcus-Thermus;                                                                        | 96.3                      | 880                | 914                   | 16.5                         | 670122                        | 559372             |
| Bacteria;Dependentiae;                                                                               | 97.1                      | 563                | 580                   | 16.5                         | 670456                        | 559689             |
| Bacteria;Desantisbacteria;                                                                           | 100.0                     | 2                  | 2                     | 16.5                         | 671034                        | 560250             |
| Bacteria;Dictyoglomi;                                                                                | 100.0                     | 9                  | 9                     | 16.5                         | 671027                        | 560243             |
| Bacteria;Edwardsbacteria;                                                                            | 25.0                      | 1                  | 4                     | 16.5                         | 671032                        | 560251             |
| Bacteria;Elusimicrobia;                                                                              | 94.5                      | 411                | 435                   | 16.5                         | 670601                        | 559841             |
| Bacteria;Entotheonellaota;                                                                           | 94.0                      | 158                | 168                   | 16.5                         | 670868                        | 560094             |
| Bacteria;Epsilonbacteraeota;                                                                         | 96.8                      | 5002               | 5167                  | 16.6                         | 665869                        | 555250             |
| Bacteria;FBP;                                                                                        | 91.0                      | 141                | 155                   | 16.5                         | 670881                        | 560111             |
| Bacteria;FCPU426;                                                                                    | 89.2                      | 33                 | 37                    | 16.5                         | 670999                        | 560219             |
| Bacteria;Fervidibacteria;                                                                            | 100.0                     | 4                  | 4                     | 16.5                         | 671032                        | 560248             |
| Bacteria;Fibrobacteres;                                                                              | 93.0                      | 695                | 747                   | 16.5                         | 670289                        | 559557             |
| Bacteria;Firestonebacteria;                                                                          | 100.0                     | 3                  | 3                     | 16.5                         | 671033                        | 560249             |
| Bacteria;Firmicutes;                                                                                 | 94.7                      | 136458             | 144048                | 19.6                         | 526988                        | 423794             |
| Bacteria;Fusobacteria;                                                                               | 95.2                      | 2073               | 2177                  | 16.5                         | 668859                        | 558179             |
| Bacteria;GAL15;                                                                                      | 93.0                      | 40                 | 43                    | 16.5                         | 670993                        | 560212             |
| Bacteria;GBS-1;                                                                                      | 100.0                     | 2                  | 2                     | 16.5                         | 671034                        | 560250             |
| Bacteria;Gemmatimonadetes;                                                                           | 93.7                      | 2047               | 2184                  | 16.5                         | 668852                        | 558205             |
| Bacteria;GN01;                                                                                       | 5.8                       | 7                  | 120                   | 16.5                         | 670916                        | 560245             |
| Bacteria;Halanaerobiaota;                                                                            | 90.1                      | 228                | 253                   | 16.5                         | 670783                        | 560024             |
| Bacteria;Hydrogenedentes;                                                                            | 93.0                      | 252                | 271                   | 16.5                         | 670765                        | 560000             |
| Bacteria;Hydrothermae;                                                                               | 94.7                      | 36                 | 38                    | 16.5                         | 670998                        | 560216             |
| Bacteria;Kiritimatiellaota;                                                                          | 93.9                      | 916                | 975                   | 16.5                         | 670061                        | 559336             |
| Bacteria;Latescibacteria;                                                                            | 96.6                      | 479                | 496                   | 16.5                         | 670540                        | 559773             |
| Bacteria;LCP-89;                                                                                     | 93.5                      | 43                 | 46                    | 16.5                         | 670990                        | 560209             |
| Bacteria;Lentisphaerae;                                                                              | 95.3                      | 447                | 469                   | 16.5                         | 670567                        | 559805             |
| Bacteria;Lindowbacteria;                                                                             | 100.0                     | 1                  | 1                     | 16.5                         | 671035                        | 560251             |
| Bacteria;Margulisbacteria;                                                                           | 93.0                      | 80                 | 86                    | 16.5                         | 670950                        | 560172             |
| Bacteria;Marinimicrobia (SAR406 clade);                                                              | 93.3                      | 517                | 554                   | 16.5                         | 670482                        | 559735             |
| Bacteria;MAT-CR-M4-B07;                                                                              | 68.0                      | 17                 | 25                    | 16.5                         | 671011                        | 560235             |
| Bacteria;Modulibacteria;                                                                             | 92.9                      | 237                | 255                   | 16.5                         | 670781                        | 560015             |
| Bacteria;Nitrospinae;                                                                                | 97.0                      | 353                | 364                   | 16.5                         | 670672                        | 559899             |
| Bacteria;Omnitrophicaeota;                                                                           | 70.8                      | 359                | 507                   | 16.5                         | 670529                        | 559893             |
| Bacteria;Patescibacteria;                                                                            | 83.8                      | 3787               | 4521                  | 16.5                         | 666515                        | 556465             |
| Bacteria;PAUC34f;                                                                                    | 86.4                      | 76                 | 88                    | 16.5                         | 670948                        | 560176             |
| Bacteria;Planctomycetes;                                                                             | 81.9                      | 7369               | 9001                  | 16.5                         | 662035                        | 552883             |
| Bacteria;Poribacteria;                                                                               | 98.0                      | 48                 | 49                    | 16.5                         | 670987                        | 560204             |
| Bacteria;Proteobacteria;                                                                             | 95.8                      | 220097             | 229787                | 22.9                         | 441249                        | 340155             |
| Bacteria;Rokubacteria;                                                                               | 94.5                      | 359                | 380                   | 16.5                         | 670656                        | 559893             |
| Bacteria;RsaHF231;                                                                                   | 100.0                     | 8                  | 8                     | 16.5                         | 671028                        | 560244             |
| Bacteria;Schekmanbacteria;                                                                           | 97.5                      | 39                 | 40                    | 16.5                         | 670996                        | 560213             |
| Bacteria;Spirochaetes;                                                                               | 94.5                      | 3968               | 4200                  | 16.6                         | 666836                        | 556284             |
| Bacteria;Synergistetes;                                                                              | 93.7                      | 1066               | 1138                  | 16.5                         | 669898                        | 559186             |
| Bacteria;TA06;                                                                                       | 98.5                      | 67                 | 68                    | 16.5                         | 670968                        | 560185             |
| Bacteria;Tenericutes;                                                                                | 93.5                      | 2335               | 2497                  | 16.5                         | 668539                        | 557917             |
| Bacteria;Thermosulfidibacteraeota;                                                                   | 100.0                     | 3                  | 3                     | 16.5                         | 671033                        | 560249             |
| Bacteria;Thermotogae;                                                                                | 95.9                      | 280                | 292                   | 16.5                         | 670744                        | 559972             |
| Bacteria;uncultured;                                                                                 | 100.0                     | 5                  | 5                     | 16.5                         | 671031                        | 560247             |
| Bacteria;Verrucomicrobia;                                                                            | 94.1                      | 4149               | 4411                  | 16.6                         | 666625                        | 556103             |
| Bacteria;W0R-1;                                                                                      | 97.1                      | 33                 | 34                    | 16.5                         | 671002                        | 560219             |
| Bacteria;W0P5-2;                                                                                     | 90.2                      | 46                 | 51                    | 16.5                         | 670985                        | 560206             |
| Bacteria;WS1;                                                                                        | 3.2                       | 3                  | 93                    | 16.5                         | 670843                        | 560249             |
| Bacteria;WS2;                                                                                        | 82.8                      | 48                 | 58                    | 16.5                         | 670978                        | 560204             |
| Bacteria;WS4;                                                                                        | 93.8                      | 15                 | 16                    | 16.5                         | 671020                        | 560237             |
| Bacteria;Zixibacteria;                                                                               | 94.1                      | 191                | 203                   | 16.5                         | 670833                        | 560061             |
| Eukaryota;                                                                                           | 0.1                       | 6.5                | 72163                 | 6.5                          | 598873                        | 560215             |

a= SILVA taxonomy, SSU r132 database; RefNR Sequence Collection  
b=(match/eligible)\*100  
c=number of match hits in the taxa path.  
d=number of hits with sequence data at the primers position in the taxa path  
e=100\*(outgroup\_matches/outgroup\_matchable)\*100  
f=number of matched hits outside the taxonomic path  
g=number of matchable hits outside the taxonomic path

**Table S6:** In silico evaluation of specificity and coverage rate of primer pairs proposed by Herlemann et al., (14) allowing two mismatch.

| Taxonomy *                                                                                           | coverage (%) <sup>b</sup> | Match <sup>c</sup> | Eligible <sup>d</sup> | specificity (%) <sup>e</sup> | outgroup matched <sup>f</sup> | outgroup matchable |
|------------------------------------------------------------------------------------------------------|---------------------------|--------------------|-----------------------|------------------------------|-------------------------------|--------------------|
| Archaea;                                                                                             | 89.9                      | 21263              | 23664                 | 14.5                         | 647372                        | 553259             |
| Bacteria;                                                                                            | 96.2                      | 553118             | 575236                | 77.7                         | 95800                         | 21404              |
| Bacteria;Acetothermia;                                                                               | 99.4                      | 164                | 165                   | 14.4                         | 670871                        | 574358             |
| Bacteria;Acidobacteria;                                                                              | 96.5                      | 14029              | 14532                 | 14.6                         | 656504                        | 560493             |
| Bacteria;Actinobacteria;                                                                             | 96.9                      | 57670              | 59486                 | 15.5                         | 611550                        | 516852             |
| Bacteria;Aegiribacteria;                                                                             | 98.1                      | 51                 | 52                    | 14.4                         | 670984                        | 574471             |
| Bacteria;Aerophobetes;                                                                               | 97.0                      | 64                 | 66                    | 14.4                         | 670970                        | 574458             |
| Bacteria;Anck6;                                                                                      | 100.0                     | 21                 | 21                    | 14.4                         | 671015                        | 574501             |
| Bacteria;Aquificae;                                                                                  | 95.5                      | 322                | 337                   | 14.4                         | 670699                        | 574200             |
| Bacteria;Armatimonadetes;                                                                            | 90.4                      | 678                | 750                   | 14.4                         | 670286                        | 573844             |
| Bacteria;Atribacteria;                                                                               | 96.4                      | 556                | 577                   | 14.4                         | 670459                        | 573966             |
| Bacteria;Atribacteria;JS1;                                                                           | 96.2                      | 511                | 531                   | 14.4                         | 670505                        | 574011             |
| Bacteria;Bacteroidetes;                                                                              | 96.8                      | 53533              | 55295                 | 15.4                         | 615741                        | 520989             |
| Bacteria;BH80-139;                                                                                   | 95.1                      | 39                 | 41                    | 14.4                         | 670995                        | 574483             |
| Bacteria;BRC1;                                                                                       | 96.6                      | 367                | 380                   | 14.4                         | 670656                        | 574155             |
| Bacteria;Caldiserica;                                                                                | 97.9                      | 93                 | 95                    | 14.4                         | 670941                        | 574429             |
| Bacteria;Calditrichaeota;                                                                            | 93.5                      | 257                | 275                   | 14.4                         | 670761                        | 574265             |
| Bacteria;Calescamantetes;                                                                            | 100.0                     | 3                  | 3                     | 14.4                         | 671033                        | 574519             |
| Bacteria;Chlamydiae;                                                                                 | 98.2                      | 383                | 390                   | 14.4                         | 670646                        | 574139             |
| Bacteria;Chloroflexi;                                                                                | 91.8                      | 8468               | 9226                  | 14.5                         | 661810                        | 566054             |
| Bacteria;Chrysiogenetes;                                                                             | 100.0                     | 10                 | 10                    | 14.4                         | 671026                        | 574512             |
| Bacteria;CK-2C2-2;                                                                                   | 95.2                      | 20                 | 21                    | 14.4                         | 671015                        | 574502             |
| Bacteria;Clocimonetes;                                                                               | 95.7                      | 287                | 300                   | 14.4                         | 670736                        | 574235             |
| Bacteria;Cyanobacteria;                                                                              | 94.5                      | 12719              | 13465                 | 14.6                         | 657571                        | 561803             |
| Bacteria;Cyanobacteria;Melainabacteria;                                                              | 96.5                      | 492                | 510                   | 14.4                         | 670526                        | 574030             |
| Bacteria;Cyanobacteria;Oxyphotobacteria;                                                             | 94.4                      | 12149              | 12873                 | 14.6                         | 658163                        | 562373             |
| Bacteria;Cyanobacteria;Oxyphotobacteria;Chloroplast;                                                 | 91.5                      | 5528               | 6039                  | 14.4                         | 664997                        | 568994             |
| Bacteria;Cyanobacteria;Oxyphotobacteria;Eurycoccales;                                                | 97.8                      | 44                 | 45                    | 14.4                         | 670991                        | 574478             |
| Bacteria;Cyanobacteria;Oxyphotobacteria;Fr127;                                                       | 100.0                     | 4                  | 4                     | 14.4                         | 671032                        | 574518             |
| Bacteria;Cyanobacteria;Oxyphotobacteria;Geitlerinematales;                                           | 100.0                     | 1                  | 1                     | 14.4                         | 671035                        | 574521             |
| Bacteria;Cyanobacteria;Oxyphotobacteria;Gloeobacterales;                                             | 100.0                     | 8                  | 8                     | 14.4                         | 671028                        | 574514             |
| Bacteria;Cyanobacteria;Oxyphotobacteria;Leptolyngbales;                                              | 97.5                      | 192                | 197                   | 14.4                         | 670839                        | 574330             |
| Bacteria;Cyanobacteria;Oxyphotobacteria;Limnitrichales;                                              | 94.1                      | 16                 | 17                    | 14.4                         | 671019                        | 574506             |
| Bacteria;Cyanobacteria;Oxyphotobacteria;Neosynechococcales;                                          | 100.0                     | 1                  | 1                     | 14.4                         | 671035                        | 574521             |
| Bacteria;Cyanobacteria;Oxyphotobacteria;Nostocales;                                                  | 96.1                      | 3621               | 3768                  | 14.4                         | 667268                        | 570901             |
| Bacteria;Cyanobacteria;Oxyphotobacteria;Oxyphotobacteria Incertae Sedis;                             | 96.4                      | 477                | 495                   | 14.4                         | 670541                        | 574045             |
| Bacteria;Cyanobacteria;Oxyphotobacteria;Phormidemiales;                                              | 97.9                      | 285                | 291                   | 14.4                         | 670745                        | 574237             |
| Bacteria;Cyanobacteria;Oxyphotobacteria;Pseudanabaenales;                                            | 99.0                      | 101                | 102                   | 14.4                         | 670934                        | 574421             |
| Bacteria;Cyanobacteria;Oxyphotobacteria;RDD11;                                                       | 87.5                      | 7                  | 8                     | 14.4                         | 671028                        | 574515             |
| Bacteria;Cyanobacteria;Oxyphotobacteria;RDD17;                                                       | 100.0                     | 12                 | 12                    | 14.4                         | 671024                        | 574510             |
| Bacteria;Cyanobacteria;Oxyphotobacteria;SepB-3;                                                      | 100.0                     | 8                  | 8                     | 14.4                         | 671028                        | 574514             |
| Bacteria;Cyanobacteria;Oxyphotobacteria;Synchococcales;                                              | 98.3                      | 1790               | 1821                  | 14.4                         | 669215                        | 572732             |
| <b>Bacteria;Cyanobacteria;Oxyphotobacteria;Synchococcales;Cyanobiaceae;</b>                          | <b>98.3</b>               | <b>1755</b>        | <b>1785</b>           | <b>14.4</b>                  | <b>669251</b>                 | <b>572767</b>      |
| <b>Bacteria;Cyanobacteria;Oxyphotobacteria;Synchococcales;Cyanobiaceae;Cyanobium PCC-6307;</b>       | <b>98.5</b>               | <b>640</b>         | <b>650</b>            | <b>14.4</b>                  | <b>670386</b>                 | <b>573882</b>      |
| <b>Bacteria;Cyanobacteria;Oxyphotobacteria;Synchococcales;Cyanobiaceae;Prochlorococcus MIT9313;</b>  | <b>98.4</b>               | <b>444</b>         | <b>451</b>            | <b>14.4</b>                  | <b>670585</b>                 | <b>574078</b>      |
| <b>Bacteria;Cyanobacteria;Oxyphotobacteria;Synchococcales;Cyanobiaceae;Synchococcus CC9902;</b>      | <b>98.1</b>               | <b>624</b>         | <b>636</b>            | <b>14.4</b>                  | <b>670400</b>                 | <b>573898</b>      |
| <b>Bacteria;Cyanobacteria;Oxyphotobacteria;Synchococcales;Cyanobiaceae;Synchococcus MBIC10613;</b>   | <b>100.0</b>              | <b>5</b>           | <b>5</b>              | <b>14.4</b>                  | <b>671031</b>                 | <b>574517</b>      |
| Bacteria;Cyanobacteria;Oxyphotobacteria;Synchococcales;Cyanobiaceae;[Synchococcus] spongiarum group; | 97.6                      | 41                 | 42                    | 14.4                         | 670994                        | 574481             |
| Bacteria;Cyanobacteria;Oxyphotobacteria;Synchococcales;Prochlorotrichaceae;                          | 100.0                     | 11                 | 11                    | 14.4                         | 671025                        | 574511             |
| Bacteria;Cyanobacteria;Oxyphotobacteria;Synchococcales;Synchococcaceae;                              | 93.3                      | 14                 | 15                    | 14.4                         | 671021                        | 574508             |
| Bacteria;Cyanobacteria;Oxyphotobacteria;Thermosynechococcales;                                       | 98.0                      | 49                 | 50                    | 14.4                         | 670986                        | 574473             |
| Bacteria;Cyanobacteria;Oxyphotobacteria;uncultured;                                                  | 100.0                     | 4                  | 4                     | 14.4                         | 671032                        | 574518             |
| Bacteria;Cyanobacteria;Sericytochromatia;                                                            | 95.1                      | 78                 | 82                    | 14.4                         | 670954                        | 574444             |
| Bacteria;Dadabacteria;                                                                               | 94.7                      | 160                | 169                   | 14.4                         | 670867                        | 574362             |
| Bacteria;Deferribacteres;                                                                            | 96.9                      | 126                | 130                   | 14.4                         | 670906                        | 574396             |
| Bacteria;Deinococcus-Thermus;                                                                        | 97.5                      | 891                | 914                   | 14.4                         | 670122                        | 573631             |
| Bacteria;Dependentiae;                                                                               | 97.4                      | 565                | 580                   | 14.4                         | 670456                        | 573957             |
| Bacteria;Desantisbacteria;                                                                           | 100.0                     | 2                  | 2                     | 14.4                         | 671034                        | 574520             |
| Bacteria;Dictyoglomi;                                                                                | 100.0                     | 9                  | 9                     | 14.4                         | 671027                        | 574513             |
| Bacteria;Edwardsbacteria;                                                                            | 100.0                     | 4                  | 4                     | 14.4                         | 671032                        | 574518             |
| Bacteria;Elusimicrobia;                                                                              | 96.8                      | 421                | 435                   | 14.4                         | 670601                        | 574101             |
| Bacteria;Enttheonellaeota;                                                                           | 95.2                      | 160                | 168                   | 14.4                         | 670868                        | 574362             |
| Bacteria;Epsilonbacteraeota;                                                                         | 97.3                      | 5026               | 5167                  | 14.5                         | 665869                        | 569496             |
| Bacteria;FBP;                                                                                        | 94.8                      | 147                | 155                   | 14.4                         | 670881                        | 574375             |
| Bacteria;FCPU426;                                                                                    | 89.2                      | 33                 | 37                    | 14.4                         | 670999                        | 574489             |
| Bacteria;Fervidibacteria;                                                                            | 100.0                     | 4                  | 4                     | 14.4                         | 671032                        | 574518             |
| Bacteria;Fibrobacteres;                                                                              | 94.5                      | 706                | 747                   | 14.4                         | 670289                        | 573816             |
| Bacteria;Firestonebacteria;                                                                          | 100.0                     | 3                  | 3                     | 14.4                         | 671033                        | 574519             |
| Bacteria;Firmicutes;                                                                                 | 96.2                      | 138553             | 144048                | 17.3                         | 526988                        | 435969             |
| Bacteria;Fusobacteria;                                                                               | 96.9                      | 2109               | 2177                  | 14.4                         | 668859                        | 572413             |
| Bacteria;GALL5;                                                                                      | 93.0                      | 40                 | 43                    | 14.4                         | 670993                        | 574482             |
| Bacteria;GBS-1;                                                                                      | 100.0                     | 2                  | 2                     | 14.4                         | 671034                        | 574520             |
| Bacteria;Gemmatimonadetes;                                                                           | 94.6                      | 2067               | 2184                  | 14.4                         | 668852                        | 572455             |
| Bacteria;GN01;                                                                                       | 5.8                       | 7                  | 120                   | 14.4                         | 670916                        | 574515             |
| Bacteria;Halanaerobiaeota;                                                                           | 93.3                      | 236                | 253                   | 14.4                         | 670783                        | 574286             |
| Bacteria;Hydrogenedentes;                                                                            | 94.1                      | 255                | 271                   | 14.4                         | 670765                        | 574267             |
| Bacteria;Hydrothermae;                                                                               | 94.7                      | 36                 | 38                    | 14.4                         | 670998                        | 574486             |
| Bacteria;Kiritimataeota;                                                                             | 95.7                      | 933                | 975                   | 14.4                         | 670661                        | 573589             |
| Bacteria;Latescibacteria;                                                                            | 97.4                      | 483                | 496                   | 14.4                         | 670540                        | 574039             |
| Bacteria;LCP-89;                                                                                     | 97.8                      | 45                 | 46                    | 14.4                         | 670990                        | 574477             |
| Bacteria;Lentisphaerae;                                                                              | 97.2                      | 456                | 469                   | 14.4                         | 670567                        | 574066             |
| Bacteria;Lindowbacteria;                                                                             | 100.0                     | 1                  | 1                     | 14.4                         | 671035                        | 574521             |
| Bacteria;Margulisbacteria;                                                                           | 94.2                      | 81                 | 86                    | 14.4                         | 670950                        | 574441             |
| Bacteria;Marinimicrobia (SAR406 clade);                                                              | 95.3                      | 528                | 554                   | 14.4                         | 670482                        | 573994             |
| Bacteria;MAT-CR-M4-B07;                                                                              | 100.0                     | 25                 | 25                    | 14.4                         | 671011                        | 574497             |
| Bacteria;Modulibacteria;                                                                             | 94.1                      | 240                | 255                   | 14.4                         | 670781                        | 574282             |
| Bacteria;Nitrospinae;                                                                                | 97.8                      | 356                | 364                   | 14.4                         | 670672                        | 574166             |
| Bacteria;Omnitrophicaeota;                                                                           | 96.6                      | 490                | 507                   | 14.4                         | 670529                        | 574032             |
| Bacteria;Patescibacteria;                                                                            | 88.0                      | 3977               | 4521                  | 14.4                         | 666515                        | 570545             |
| Bacteria;PAUC34f;                                                                                    | 94.3                      | 83                 | 88                    | 14.4                         | 670948                        | 574439             |
| Bacteria;Planctomycetes;                                                                             | 86.7                      | 7803               | 9001                  | 14.4                         | 662035                        | 566719             |
| Bacteria;Poribacteria;                                                                               | 98.0                      | 48                 | 49                    | 14.4                         | 670987                        | 574474             |
| Bacteria;Proteobacteria;                                                                             | 96.7                      | 222097             | 229787                | 20.1                         | 441249                        | 352425             |
| Bacteria;Rokubacteria;                                                                               | 94.7                      | 360                | 380                   | 14.4                         | 670656                        | 574162             |
| Bacteria;RsaHF231;                                                                                   | 100.0                     | 8                  | 8                     | 14.4                         | 671028                        | 574514             |
| Bacteria;Spirochaetes;                                                                               | 96.1                      | 4036               | 4200                  | 14.4                         | 666836                        | 570486             |
| Bacteria;Synneistetes;                                                                               | 96.5                      | 1098               | 1138                  | 14.4                         | 669898                        | 573424             |
| Bacteria;TAD6;                                                                                       | 94.5                      | 67                 | 68                    | 14.4                         | 670968                        | 574455             |
| Bacteria;Tenericutes;                                                                                | 97.5                      | 2435               | 2497                  | 14.4                         | 668539                        | 572087             |
| Bacteria;Thermosulfidibacteraeota;                                                                   | 100.0                     | 3                  | 3                     | 14.4                         | 671033                        | 574519             |
| Bacteria;Thermotogae;                                                                                | 97.6                      | 285                | 292                   | 14.4                         | 670744                        | 574237             |
| Bacteria;uncultured;                                                                                 | 100.0                     | 5                  | 5                     | 14.4                         | 671031                        | 574517             |
| Bacteria;Verrucomicrobia;                                                                            | 95.2                      | 4199               | 4411                  | 14.4                         | 666625                        | 570323             |
| Bacteria;WOR-1;                                                                                      | 97.1                      | 33                 | 34                    | 14.4                         | 671002                        | 574489             |
| Bacteria;WPS-2;                                                                                      | 90.2                      | 46                 | 51                    | 14.4                         | 670985                        | 574476             |
| Bacteria;WS1;                                                                                        | 3.2                       | 3                  | 93                    | 14.4                         | 670943                        | 574519             |
| Bacteria;WS2;                                                                                        | 84.5                      | 49                 | 58                    | 14.4                         | 670978                        | 574473             |
| Bacteria;WS4;                                                                                        | 93.8                      | 15                 | 16                    | 14.4                         | 671020                        | 574507             |
| Bacteria;Zixibacteria;                                                                               | 95.6                      | 194                | 203                   | 14.4                         | 670833                        | 574328             |
| Eukaryota;                                                                                           | 0.2                       | 163                | 72163                 | 4.1                          | 598873                        | 574359             |

a= SILVA taxonomy, SSU r132 database; RefNR Sequence Collection

b=(match/elegible)\*100

c=number of match hits in the taxa path.

d=number of hits whitesequence data at the primers position in the taxa path

e=100\*(outgroup\_matches/outgroup\_matchable)\*100

f=number of matched hits outside the taxonomic path

g=number of matchable hits outside the taxonomic path

**Table S7:** In silico evaluation of specificity and coverage rate of primer pairs proposed by Parada et al., (15) allowing zero mismatch.

| Taxonomy <sup>a</sup>                                                                              | coverage (%) <sup>b</sup> | Match  | Eligible <sup>d</sup> | specificity (%) <sup>e</sup> | outgroup matched <sup>f</sup> | outgroup matchable |
|----------------------------------------------------------------------------------------------------|---------------------------|--------|-----------------------|------------------------------|-------------------------------|--------------------|
| Archaea;                                                                                           | 84.6                      | 20824  | 24615                 | 12                           | 649163                        | 571167             |
| Bacteria;                                                                                          | 88.4                      | 508457 | 575261                | 15.2                         | 98517                         | 83534              |
| Bacteria;Acetothermia;                                                                             | 0.6                       | 1      | 165                   | 12.1                         | 673613                        | 591990             |
| Bacteria;Acidobacteria;                                                                            | 93.4                      | 13575  | 14532                 | 12.3                         | 659246                        | 578416             |
| Bacteria;Actinobacteria;                                                                           | 85.5                      | 50887  | 59486                 | 11.9                         | 614292                        | 541104             |
| Bacteria;Aegiribacteria;                                                                           | 88.5                      | 46     | 52                    | 12.1                         | 673726                        | 591945             |
| Bacteria;Aerophobetes;                                                                             | 1.5                       | 1      | 66                    | 12.1                         | 673712                        | 591990             |
| Bacteria;Anck6;                                                                                    | 90.5                      | 19     | 21                    | 12.1                         | 673757                        | 591972             |
| Bacteria;Aquificae;                                                                                | 78.9                      | 266    | 337                   | 12.1                         | 673441                        | 591725             |
| Bacteria;Armatimonadetes;                                                                          | 89.5                      | 671    | 750                   | 12.1                         | 673028                        | 591320             |
| Bacteria;Atribacteria;                                                                             | 91.2                      | 527    | 578                   | 12.1                         | 673200                        | 591464             |
| Bacteria;Bacteroidetes;                                                                            | 90.0                      | 49754  | 55295                 | 12.3                         | 618483                        | 542237             |
| Bacteria;BH180-139;                                                                                | 90.2                      | 37     | 41                    | 12.1                         | 673737                        | 591954             |
| Bacteria;BRC1;                                                                                     | 89.7                      | 341    | 380                   | 12.1                         | 673398                        | 591650             |
| Bacteria;Caldiserica;                                                                              | 5.3                       | 5      | 95                    | 12.1                         | 673683                        | 591986             |
| Bacteria;Calditrichaeota;                                                                          | 87.3                      | 240    | 275                   | 12.1                         | 673503                        | 591751             |
| Bacteria;Chlamydiae;                                                                               | 17.4                      | 68     | 390                   | 12.1                         | 673888                        | 591923             |
| Bacteria;Chloroflexi;                                                                              | 79.6                      | 7344   | 9226                  | 12                           | 664552                        | 584647             |
| Bacteria;Chrysiogenetes;                                                                           | 80.0                      | 8      | 10                    | 12.1                         | 673768                        | 591983             |
| Bacteria;CK-2C2-2;                                                                                 | 100.0                     | 21     | 21                    | 12.1                         | 673757                        | 591970             |
| Bacteria;Coprothermobacteraeota;                                                                   | 94.6                      | 70     | 74                    | 12.1                         | 673704                        | 591921             |
| Bacteria;Cyanobacteria;                                                                            | 88.4                      | 11904  | 13467                 | 12.1                         | 660311                        | 580087             |
| Bacteria;Cyanobacteria;Melainabacteria;                                                            | 92.4                      | 471    | 510                   | 12.1                         | 673268                        | 591520             |
| Bacteria;Cyanobacteria;Oxyphotobacteria;                                                           | 88.2                      | 11355  | 12875                 | 12.1                         | 660903                        | 580636             |
| Bacteria;Cyanobacteria;Oxyphotobacteria;Chloroplast;                                               | 84.3                      | 5094   | 6041                  | 12.1                         | 667737                        | 586897             |
| Bacteria;Cyanobacteria;Oxyphotobacteria;Eurycoccales;                                              | 95.6                      | 43     | 45                    | 12.1                         | 673733                        | 591948             |
| Bacteria;Cyanobacteria;Oxyphotobacteria;Fr127;                                                     | 75.0                      | 3      | 4                     | 12.1                         | 673774                        | 591988             |
| Bacteria;Cyanobacteria;Oxyphotobacteria;Geitlerinematatales;                                       | 100.0                     | 1      | 1                     | 12.1                         | 673777                        | 591990             |
| Bacteria;Cyanobacteria;Oxyphotobacteria;Gloeobacterales;                                           | 100.0                     | 8      | 8                     | 12.1                         | 673770                        | 591983             |
| Bacteria;Cyanobacteria;Oxyphotobacteria;Leptolyngbyales;                                           | 91.4                      | 180    | 197                   | 12.1                         | 673581                        | 591811             |
| Bacteria;Cyanobacteria;Oxyphotobacteria;Limnolichales;                                             | 100.0                     | 17     | 17                    | 12.1                         | 673761                        | 591974             |
| Bacteria;Cyanobacteria;Oxyphotobacteria;Neosynechococcales;                                        | 100.0                     | 1      | 1                     | 12.1                         | 673777                        | 591990             |
| Bacteria;Cyanobacteria;Oxyphotobacteria;Nostocales;                                                | 91.7                      | 3454   | 3768                  | 12.2                         | 670010                        | 588537             |
| Bacteria;Cyanobacteria;Oxyphotobacteria;Oxyphotobacteria Incertae Sedis;                           | 87.5                      | 433    | 495                   | 12.1                         | 673283                        | 591558             |
| Bacteria;Cyanobacteria;Oxyphotobacteria;Phormidemiales;                                            | 91.8                      | 267    | 291                   | 12.1                         | 673487                        | 591724             |
| Bacteria;Cyanobacteria;Oxyphotobacteria;Pseudanabaenales;                                          | 99.0                      | 101    | 102                   | 12.1                         | 673676                        | 591890             |
| Bacteria;Cyanobacteria;Oxyphotobacteria;RD011;                                                     | 75.0                      | 6      | 8                     | 12.1                         | 673770                        | 591985             |
| Bacteria;Cyanobacteria;Oxyphotobacteria;RD017;                                                     | 91.7                      | 11     | 12                    | 12.1                         | 673766                        | 591980             |
| Bacteria;Cyanobacteria;Oxyphotobacteria;SepB-3;                                                    | 87.5                      | 7      | 8                     | 12.1                         | 673770                        | 591984             |
| Bacteria;Cyanobacteria;Oxyphotobacteria;Synchococcales;                                            | 92.0                      | 1676   | 1821                  | 12.1                         | 671957                        | 590315             |
| Bacteria;Cyanobacteria;Oxyphotobacteria;Synchococcales;Cyanobiaceae;                               | 91.9                      | 1641   | 1785                  | 12.1                         | 671993                        | 590350             |
| Bacteria;Cyanobacteria;Oxyphotobacteria;Synchococcales;Cyanobiaceae;Cyanobium PCC-6307;            | 94.5                      | 614    | 650                   | 12.1                         | 673128                        | 591377             |
| Bacteria;Cyanobacteria;Oxyphotobacteria;Synchococcales;Cyanobiaceae;Prochlorococcus MIT9313;       | 83.8                      | 378    | 451                   | 12.1                         | 673327                        | 591613             |
| Bacteria;Cyanobacteria;Oxyphotobacteria;Synchococcales;Cyanobiaceae;Synchococcus CC9902;           | 94.5                      | 601    | 636                   | 12.1                         | 673142                        | 591390             |
| Bacteria;Cyanobacteria;Oxyphotobacteria;Synchococcales;Cyanobiaceae;Synchococcus MBIC10613;        | 100.0                     | 5      | 5                     | 12.1                         | 673773                        | 591986             |
| Bacteria;Cyanobacteria;Oxyphotobacteria;Synchococcales;Cyanobiaceae;[Synchococcus] spongium group; | 100.0                     | 42     | 42                    | 12.1                         | 673736                        | 591949             |
| Bacteria;Cyanobacteria;Oxyphotobacteria;Synchococcales;Prochlorotrichaceae;                        | 100.0                     | 11     | 11                    | 12.1                         | 673767                        | 591980             |
| Bacteria;Cyanobacteria;Oxyphotobacteria;Synchococcales;Synchococcaceae;                            | 93.3                      | 14     | 15                    | 12.1                         | 673763                        | 591977             |
| Bacteria;Cyanobacteria;Oxyphotobacteria;Thermosynechococcales;                                     | 94.0                      | 47     | 50                    | 12.1                         | 673728                        | 591944             |
| Bacteria;Cyanobacteria;Sericytochromatiales;                                                       | 95.1                      | 78     | 82                    | 12.1                         | 673696                        | 591913             |
| Bacteria;Dadabacteria;                                                                             | 91.1                      | 154    | 169                   | 12.1                         | 673609                        | 591837             |
| Bacteria;Deferribacteres;                                                                          | 93.1                      | 121    | 130                   | 12.1                         | 673648                        | 591870             |
| Bacteria;Deinococcus-Thermus;                                                                      | 92.3                      | 844    | 914                   | 12.1                         | 672864                        | 591147             |
| Bacteria;Dependentiae;                                                                             | 86.9                      | 504    | 580                   | 12.1                         | 673198                        | 591487             |
| Bacteria;Dictyoglomi;                                                                              | 88.9                      | 8      | 9                     | 12.1                         | 673769                        | 591983             |
| Bacteria;Edwardsbacteria;                                                                          | 50.0                      | 2      | 4                     | 12.1                         | 673774                        | 591989             |
| Bacteria;Elusimicrobia;                                                                            | 88.7                      | 386    | 435                   | 12.1                         | 673343                        | 591605             |
| Bacteria;Entotheonellaeota;                                                                        | 71.4                      | 120    | 168                   | 12.1                         | 673610                        | 591871             |
| Bacteria;Epsilonbacteraeota;                                                                       | 1.6                       | 83     | 5167                  | 11.5                         | 668611                        | 591908             |
| Bacteria;FBP;                                                                                      | 91.0                      | 141    | 155                   | 12.1                         | 673623                        | 591850             |
| Bacteria;FCPU426;                                                                                  | 78.4                      | 29     | 37                    | 12.1                         | 673741                        | 591962             |
| Bacteria;Fibrobacteres;                                                                            | 83.9                      | 627    | 747                   | 12.1                         | 673031                        | 591364             |
| Bacteria;Firestonebacteria;                                                                        | 33.3                      | 1      | 3                     | 12.1                         | 673775                        | 591990             |
| Bacteria;Firmicutes;                                                                               | 87.9                      | 126673 | 144050                | 12.2                         | 529728                        | 465318             |
| Bacteria;Fusobacteria;                                                                             | 84.1                      | 1831   | 2177                  | 12.1                         | 671601                        | 590160             |
| Bacteria;GAL15;                                                                                    | 95.3                      | 41     | 43                    | 12.1                         | 673735                        | 591950             |
| Bacteria;GBS-1;                                                                                    | 100.0                     | 2      | 2                     | 12.1                         | 673776                        | 591989             |
| Bacteria;Gemmatimonadetes;                                                                         | 92.0                      | 2010   | 2184                  | 12.2                         | 671594                        | 589981             |
| Bacteria;GN01;                                                                                     | 65.0                      | 78     | 120                   | 12.1                         | 673658                        | 591913             |
| Bacteria;Halanaerobiaeota;                                                                         | 86.6                      | 219    | 253                   | 12.1                         | 673525                        | 591772             |
| Bacteria;Hydrogenedentes;                                                                          | 95.6                      | 259    | 271                   | 12.1                         | 673507                        | 591732             |
| Bacteria;Hydrothermae;                                                                             | 73.7                      | 28     | 38                    | 12.1                         | 673740                        | 591963             |
| Bacteria;Kiritimatiellaeota;                                                                       | 88.3                      | 861    | 975                   | 12.1                         | 672803                        | 591130             |
| Bacteria;Latescibacteria;                                                                          | 90.9                      | 452    | 497                   | 12.1                         | 673281                        | 591539             |
| Bacteria;LCP-89;                                                                                   | 89.1                      | 41     | 46                    | 12.1                         | 673732                        | 591950             |
| Bacteria;Lentisphaerae;                                                                            | 90.6                      | 425    | 469                   | 12.1                         | 673309                        | 591566             |
| Bacteria;Lindowbacteria;                                                                           | 100.0                     | 1      | 1                     | 12.1                         | 673777                        | 591990             |
| Bacteria;Margulisbacteria;                                                                         | 96.5                      | 83     | 86                    | 12.1                         | 673692                        | 591908             |
| Bacteria;Marinimicrobia (SAR406 clade);                                                            | 94.0                      | 521    | 554                   | 12.1                         | 673224                        | 591470             |
| Bacteria;MAT-CR-M4-B07;                                                                            | 88.0                      | 22     | 25                    | 12.1                         | 673753                        | 591969             |
| Bacteria;Modulibacteria;                                                                           | 78.8                      | 201    | 255                   | 12.1                         | 673523                        | 591790             |
| Bacteria;Nitrospinae;                                                                              | 96.2                      | 350    | 364                   | 12.1                         | 673414                        | 591641             |
| Bacteria;Nitrospirae;                                                                              | 91.5                      | 1184   | 1294                  | 12.1                         | 672484                        | 590807             |
| Bacteria;Omnitrophicaeota;                                                                         | 91.3                      | 463    | 507                   | 12.1                         | 673271                        | 591528             |
| Bacteria;Patescibacteria;                                                                          | 4.2                       | 189    | 4521                  | 11.6                         | 669257                        | 591802             |
| Bacteria;PAUC34f;                                                                                  | 97.7                      | 86     | 88                    | 12.1                         | 673690                        | 591905             |
| Bacteria;Planctomycetes;                                                                           | 85.9                      | 7734   | 9002                  | 12.1                         | 664776                        | 584257             |
| Bacteria;Proteobacteria;                                                                           | 93.1                      | 213874 | 229805                | 14.8                         | 443973                        | 378117             |
| Bacteria;Rokubacteria;                                                                             | 93.7                      | 356    | 380                   | 12.1                         | 673398                        | 591635             |
| Bacteria;RsaHF231;                                                                                 | 75.0                      | 6      | 8                     | 12.1                         | 673770                        | 591985             |
| Bacteria;Schekmanbacteria;                                                                         | 95.0                      | 38     | 40                    | 12.1                         | 673738                        | 591953             |
| Bacteria;Spirochaetes;                                                                             | 88.5                      | 3718   | 4200                  | 12.1                         | 669578                        | 588273             |
| Bacteria;Synergistetes;                                                                            | 92.7                      | 1055   | 1138                  | 12.1                         | 672640                        | 590936             |
| Bacteria;TA06;                                                                                     | 85.3                      | 58     | 68                    | 12.1                         | 673710                        | 591933             |
| Bacteria;Tenericutes;                                                                              | 78.9                      | 1971   | 2497                  | 12.1                         | 671281                        | 590020             |
| Bacteria;Thermosulfidibacteraeota;                                                                 | 66.7                      | 2      | 3                     | 12.1                         | 673775                        | 591989             |
| Bacteria;Thermotogae;                                                                              | 91.1                      | 266    | 292                   | 12.1                         | 673486                        | 591725             |
| Bacteria;Verrucomicrobia;                                                                          | 88.9                      | 3923   | 4411                  | 12.1                         | 669367                        | 588068             |
| Bacteria;WOR-1;                                                                                    | 23.5                      | 8      | 34                    | 12.1                         | 673744                        | 591983             |
| Bacteria;WPS-2;                                                                                    | 98.0                      | 50     | 51                    | 12.1                         | 673727                        | 591941             |
| Bacteria;WS1;                                                                                      | 76.3                      | 71     | 93                    | 12.1                         | 673685                        | 591920             |
| Bacteria;WS2;                                                                                      | 82.8                      | 48     | 58                    | 12.1                         | 673720                        | 591943             |
| Bacteria;WS4;                                                                                      | 100.0                     | 16     | 16                    | 12.1                         | 673762                        | 591975             |
| Bacteria;Zixibacteria;                                                                             | 86.7                      | 176    | 203                   | 12.1                         | 673575                        | 591815             |
| Eukaryota;                                                                                         | 84.9                      | 62731  | 73929                 | 11.8                         | 599849                        | 529260             |
| Eukaryota;uncultured;                                                                              | 72.7                      | 8      | 11                    | 12.1                         | 673767                        | 591983             |

a= SILVAtaxonomy, SSU r132 database; RefNR Sequence Collection  
b=(match/eligible)\*100  
c=number of match hits in the taxa path.  
d=number of hits withsequence data at the primers position in the taxa path  
e=100-(outgroup\_matches/outgroup\_matchable)\*100  
f=number of matched hits outside the taxonomic path  
g=number of matchable hits outside the taxonomic path



**Table S8:** In silico evaluation of specificity and coverage rate of primer pairs proposed by Parada et al., (15) allowing one mismatch.

| Taxonomy *                                                                                                  | coverage (%) <sup>a</sup> | Match  | Eligible | specificity (%) <sup>b</sup> | outgroup matched <sup>c</sup> | outgroup matchable |
|-------------------------------------------------------------------------------------------------------------|---------------------------|--------|----------|------------------------------|-------------------------------|--------------------|
| Archaea;                                                                                                    | 92.9                      | 22858  | 24615    | 4.8                          | 649163                        | 617934             |
| Bacteria;                                                                                                   | 95.5                      | 549190 | 575261   | 7                            | 98517                         | 91602              |
| Bacteria;Acetothermia;                                                                                      | 56.4                      | 93     | 165      | 4.9                          | 673613                        | 640699             |
| Bacteria;Acidobacteria;                                                                                     | 97.4                      | 14160  | 14532    | 4.9                          | 659246                        | 626632             |
| Bacteria;Actinobacteria;                                                                                    | 95.0                      | 56525  | 59486    | 4.9                          | 614292                        | 584267             |
| Bacteria;Aegiribacteria;                                                                                    | 96.2                      | 50     | 52       | 4.9                          | 673726                        | 640742             |
| Bacteria;Aerophobetes;                                                                                      | 97.0                      | 64     | 66       | 4.9                          | 673712                        | 640728             |
| Bacteria;AncK6;                                                                                             | 95.2                      | 20     | 21       | 4.9                          | 673757                        | 640772             |
| Bacteria;Aquilifcae;                                                                                        | 95.3                      | 321    | 337      | 4.9                          | 673441                        | 640471             |
| Bacteria;Armatimonadetes;                                                                                   | 95.7                      | 718    | 750      | 4.9                          | 673028                        | 640074             |
| Bacteria;Atribacteria;                                                                                      | 97.2                      | 562    | 578      | 4.9                          | 673200                        | 640230             |
| Bacteria;Bacteroidetes;                                                                                     | 95.7                      | 52895  | 55295    | 4.9                          | 618483                        | 587897             |
| Bacteria;BH80-139;                                                                                          | 95.1                      | 39     | 41       | 4.9                          | 673737                        | 640753             |
| Bacteria;BR1;                                                                                               | 94.7                      | 360    | 380      | 4.9                          | 673398                        | 640432             |
| Bacteria;Caldiserica;                                                                                       | 91.6                      | 87     | 95       | 4.9                          | 673683                        | 640705             |
| Bacteria;Calditrichaeota;                                                                                   | 92.4                      | 254    | 275      | 4.9                          | 673503                        | 640538             |
| Bacteria;Calescamantes;                                                                                     | 100.0                     | 3      | 3        | 4.9                          | 673775                        | 640789             |
| Bacteria;Chlamydiae;                                                                                        | 94.1                      | 367    | 390      | 4.9                          | 673388                        | 640425             |
| Bacteria;Chloroflexi;                                                                                       | 94.8                      | 8743   | 9226     | 4.9                          | 664552                        | 632049             |
| Bacteria;Chrysiogenetes;                                                                                    | 80.0                      | 8      | 10       | 4.9                          | 673768                        | 640784             |
| Bacteria;CK-2C2-2;                                                                                          | 100.0                     | 21     | 21       | 4.9                          | 673757                        | 640771             |
| Bacteria;Cloacimonetes;                                                                                     | 92.0                      | 276    | 300      | 4.9                          | 673478                        | 640516             |
| Bacteria;Coprothermobacteraeota;                                                                            | 97.3                      | 72     | 74       | 4.9                          | 673704                        | 640720             |
| Bacteria;Cyanobacteria;                                                                                     | 93.9                      | 12648  | 13467    | 4.9                          | 660311                        | 628144             |
| Bacteria;Cyanobacteria;Melainabacteria;                                                                     | 96.7                      | 493    | 510      | 4.9                          | 673268                        | 640299             |
| Bacteria;Cyanobacteria;Oxyphotobacteria;                                                                    | 93.8                      | 12074  | 12875    | 4.9                          | 669093                        | 628718             |
| Bacteria;Cyanobacteria;Oxyphotobacteria;Chloroplast;                                                        | 91.3                      | 5514   | 6041     | 4.9                          | 667737                        | 635278             |
| Bacteria;Cyanobacteria;Oxyphotobacteria;Eurycocales;                                                        | 97.8                      | 44     | 45       | 4.9                          | 673733                        | 640748             |
| Bacteria;Cyanobacteria;Oxyphotobacteria;Fr127;                                                              | 75.0                      | 3      | 4        | 4.9                          | 673774                        | 640789             |
| Bacteria;Cyanobacteria;Oxyphotobacteria;Gettlerinemales;                                                    | 100.0                     | 1      | 1        | 4.9                          | 673777                        | 640791             |
| Bacteria;Cyanobacteria;Oxyphotobacteria;Gloeobacterales;                                                    | 100.0                     | 8      | 8        | 4.9                          | 673770                        | 640784             |
| Bacteria;Cyanobacteria;Oxyphotobacteria;Leptolyngbyales;                                                    | 95.9                      | 189    | 197      | 4.9                          | 673581                        | 640603             |
| Bacteria;Cyanobacteria;Oxyphotobacteria;Limnoriales;                                                        | 100.0                     | 17     | 17       | 4.9                          | 673761                        | 640775             |
| Bacteria;Cyanobacteria;Oxyphotobacteria;Neosynechococcales;                                                 | 100.0                     | 1      | 1        | 4.9                          | 673777                        | 640791             |
| Bacteria;Cyanobacteria;Oxyphotobacteria;Nostocales;                                                         | 95.9                      | 3612   | 3768     | 4.9                          | 670010                        | 637180             |
| Bacteria;Cyanobacteria;Oxyphotobacteria;Oxyphotobacteria Incertae Sedis;                                    | 94.1                      | 466    | 495      | 4.9                          | 673283                        | 640326             |
| Bacteria;Cyanobacteria;Oxyphotobacteria;Phormidiales;                                                       | 95.2                      | 277    | 291      | 4.9                          | 673487                        | 640515             |
| Bacteria;Cyanobacteria;Oxyphotobacteria;Pseudanabaenales;                                                   | 99.0                      | 101    | 102      | 4.9                          | 673676                        | 640691             |
| Bacteria;Cyanobacteria;Oxyphotobacteria;Pseudanabaenaceae;                                                  | 99.0                      | 101    | 102      | 4.9                          | 673676                        | 640691             |
| Bacteria;Cyanobacteria;Oxyphotobacteria;Pseudanabaenales;Pseudanabaenaceae;Pseudanabaena PCC-6802;          | 100.0                     | 4      | 4        | 4.9                          | 673774                        | 640788             |
| Bacteria;Cyanobacteria;Oxyphotobacteria;Pseudanabaenales;Pseudanabaenaceae;Pseudanabaena PCC-7367;          | 100.0                     | 8      | 8        | 4.9                          | 673770                        | 640784             |
| Bacteria;Cyanobacteria;Oxyphotobacteria;Pseudanabaenales;Pseudanabaenaceae;Pseudanabaena PCC-7403;          | 100.0                     | 3      | 3        | 4.9                          | 673775                        | 640789             |
| Bacteria;Cyanobacteria;Oxyphotobacteria;Pseudanabaenales;Pseudanabaenaceae;Pseudanabaena PCC-7429;          | 100.0                     | 37     | 37       | 4.9                          | 673741                        | 640755             |
| Bacteria;Cyanobacteria;Oxyphotobacteria;Pseudanabaenales;Pseudanabaenaceae;Synechococcus PCC-7502;          | 100.0                     | 14     | 14       | 4.9                          | 673764                        | 640778             |
| Bacteria;Cyanobacteria;Oxyphotobacteria;Pseudanabaenales;Pseudanabaenaceae;uncultured;                      | 97.1                      | 34     | 35       | 4.9                          | 673743                        | 640758             |
| Bacteria;Cyanobacteria;Oxyphotobacteria;RD011;                                                              | 100.0                     | 8      | 8        | 4.9                          | 673770                        | 640784             |
| Bacteria;Cyanobacteria;Oxyphotobacteria;RD017;                                                              | 91.7                      | 11     | 12       | 4.9                          | 673766                        | 640781             |
| Bacteria;Cyanobacteria;Oxyphotobacteria;SepP-3;                                                             | 100.0                     | 8      | 8        | 4.9                          | 673770                        | 640784             |
| Bacteria;Cyanobacteria;Oxyphotobacteria;Synechococcales;                                                    | 96.7                      | 1761   | 1821     | 4.9                          | 671957                        | 639031             |
| Bacteria;Cyanobacteria;Oxyphotobacteria;Synechococcales;Cyanobiaceae;                                       | 96.6                      | 1725   | 1785     | 4.9                          | 671993                        | 639067             |
| Bacteria;Cyanobacteria;Oxyphotobacteria;Synechococcales;Cyanobiaceae;Cyanobium PCC-6307;                    | 98.0                      | 637    | 650      | 4.9                          | 673128                        | 640155             |
| Bacteria;Cyanobacteria;Oxyphotobacteria;Synechococcales;Cyanobiaceae;Prochlorococcus MIT9313;               | 91.1                      | 411    | 451      | 4.9                          | 673327                        | 640381             |
| Bacteria;Cyanobacteria;Oxyphotobacteria;Synechococcales;Cyanobiaceae;Synechococcus CC9902;                  | 98.9                      | 629    | 636      | 4.9                          | 673142                        | 640163             |
| Bacteria;Cyanobacteria;Oxyphotobacteria;Synechococcales;Cyanobiaceae;Synechococcus MBIC10613;               | 100.0                     | 5      | 5        | 4.9                          | 673773                        | 640787             |
| Bacteria;Cyanobacteria;Oxyphotobacteria;Synechococcales;Cyanobiaceae;Synechococcus] spongiarium group;      | 100.0                     | 42     | 42       | 4.9                          | 673736                        | 640750             |
| Bacteria;Cyanobacteria;Oxyphotobacteria;Synechococcales;Prochlorotrichaceae;                                | 100.0                     | 11     | 11       | 4.9                          | 673767                        | 640781             |
| Bacteria;Cyanobacteria;Oxyphotobacteria;Synechococcales;Synechococaceae;                                    | 100.0                     | 15     | 15       | 4.9                          | 673763                        | 640777             |
| Bacteria;Cyanobacteria;Oxyphotobacteria;Thermosynechococcales;                                              | 94.0                      | 47     | 50       | 4.9                          | 673728                        | 640745             |
| Bacteria;Cyanobacteria;Oxyphotobacteria;Thermosynechococcales;Acaryochloridaceae;                           | 86.7                      | 13     | 15       | 4.9                          | 673763                        | 640779             |
| Bacteria;Cyanobacteria;Oxyphotobacteria;Thermosynechococcales;Acaryochloridaceae;Acaryochloris MBIC1101;    | 86.7                      | 13     | 15       | 4.9                          | 673763                        | 640779             |
| Bacteria;Cyanobacteria;Oxyphotobacteria;Thermosynechococcales;Thermosynechococaceae;                        | 97.1                      | 34     | 35       | 4.9                          | 673743                        | 640758             |
| Bacteria;Cyanobacteria;Oxyphotobacteria;Thermosynechococcales;Thermosynechococaceae;Cyanothera PCC 7;       | 100.0                     | 8      | 8        | 4.9                          | 673770                        | 640784             |
| Bacteria;Cyanobacteria;Oxyphotobacteria;Thermosynechococcales;Thermosynechococaceae;Loriellopsis LF-BS;     | 83.3                      | 5      | 6        | 4.9                          | 673772                        | 640787             |
| Bacteria;Cyanobacteria;Oxyphotobacteria;Thermosynechococcales;Thermosynechococaceae;Synechococcus IR;       | 100.0                     | 6      | 6        | 4.9                          | 673772                        | 640786             |
| Bacteria;Cyanobacteria;Oxyphotobacteria;Thermosynechococcales;Thermosynechococaceae;Synechococcus P4;       | 100.0                     | 2      | 2        | 4.9                          | 673776                        | 640790             |
| Bacteria;Cyanobacteria;Oxyphotobacteria;Thermosynechococcales;Thermosynechococaceae;Thermosynechococcus P6; | 100.0                     | 9      | 9        | 4.9                          | 673769                        | 640783             |
| Bacteria;Cyanobacteria;Oxyphotobacteria;Thermosynechococcales;Thermosynechococaceae;uncultured;             | 100.0                     | 3      | 3        | 4.9                          | 673775                        | 640789             |
| Bacteria;Cyanobacteria;Oxyphotobacteria;uncultured;                                                         | 100.0                     | 4      | 4        | 4.9                          | 673774                        | 640788             |
| Bacteria;Cyanobacteria;Sericotychromatia;                                                                   | 98.8                      | 81     | 82       | 4.9                          | 673696                        | 640711             |
| Bacteria;Dadabacteria;                                                                                      | 98.2                      | 166    | 169      | 4.9                          | 673609                        | 640626             |
| Bacteria;Deferribacteres;                                                                                   | 97.7                      | 127    | 130      | 4.9                          | 673648                        | 640665             |
| Bacteria;Deinococcus-Thermus;                                                                               | 97.0                      | 887    | 914      | 4.9                          | 672864                        | 639905             |
| Bacteria;Desferriplasma;                                                                                    | 96.6                      | 560    | 580      | 4.9                          | 673198                        | 640232             |
| Bacteria;Desantisbacteria;                                                                                  | 100.0                     | 2      | 2        | 4.9                          | 673776                        | 640790             |
| Bacteria;Dictyoglomi;                                                                                       | 88.9                      | 8      | 9        | 4.9                          | 673769                        | 640784             |
| Bacteria;Edwardsbacteria;                                                                                   | 75.0                      | 3      | 4        | 4.9                          | 673774                        | 640789             |
| Bacteria;Elusimicrobia;                                                                                     | 96.8                      | 421    | 435      | 4.9                          | 673343                        | 640371             |
| Bacteria;Entotheonellaota;                                                                                  | 99.4                      | 167    | 168      | 4.9                          | 673610                        | 640625             |
| Bacteria;Epsilonbacteraeota;                                                                                | 95.2                      | 4921   | 5167     | 4.9                          | 668611                        | 635871             |
| Bacteria;FBP;                                                                                               | 98.7                      | 153    | 155      | 4.9                          | 673623                        | 640639             |
| Bacteria;FCPU425;                                                                                           | 91.9                      | 34     | 37       | 4.9                          | 673741                        | 640758             |
| Bacteria;Fibrobacteres;                                                                                     | 93.3                      | 697    | 747      | 4.9                          | 673031                        | 640095             |
| Bacteria;Firestonebacteria;                                                                                 | 100.0                     | 3      | 3        | 4.9                          | 673775                        | 640789             |
| Bacteria;Firmicutes;                                                                                        | 94.6                      | 136341 | 144050   | 4.8                          | 529728                        | 504451             |
| Bacteria;Fusobacteria;                                                                                      | 91.0                      | 1980   | 2177     | 4.9                          | 671601                        | 638812             |
| Bacteria;GAL15;                                                                                             | 100.0                     | 43     | 43       | 4.9                          | 673735                        | 640749             |
| Bacteria;GBS-1;                                                                                             | 100.0                     | 2      | 2        | 4.9                          | 673776                        | 640790             |
| Bacteria;Gemmatimonadetes;                                                                                  | 96.4                      | 2106   | 2184     | 4.9                          | 671594                        | 638686             |
| Bacteria;GN01;                                                                                              | 80.8                      | 97     | 120      | 4.9                          | 673658                        | 640695             |
| Bacteria;Halanaerobacteria;                                                                                 | 92.9                      | 235    | 253      | 4.9                          | 673525                        | 640557             |
| Bacteria;Hydrogenedentes;                                                                                   | 98.5                      | 267    | 271      | 4.9                          | 673507                        | 640525             |
| Bacteria;Hydrothermae;                                                                                      | 97.4                      | 37     | 38       | 4.9                          | 673740                        | 640755             |
| Bacteria;Kiritimatellaeota;                                                                                 | 94.7                      | 923    | 975      | 4.9                          | 672803                        | 639869             |
| Bacteria;Latescibacteria;                                                                                   | 96.2                      | 478    | 497      | 4.9                          | 673281                        | 640314             |
| Bacteria;LCP-89;                                                                                            | 97.8                      | 45     | 46       | 4.9                          | 673732                        | 640747             |
| Bacteria;Lentisphaerae;                                                                                     | 96.4                      | 452    | 469      | 4.9                          | 673309                        | 640340             |
| Bacteria;Lindobacteria;                                                                                     | 100.0                     | 1      | 1        | 4.9                          | 673777                        | 640791             |
| Bacteria;Margulisbacteria;                                                                                  | 98.8                      | 85     | 86       | 4.9                          | 673692                        | 640707             |
| Bacteria;Marinimicrobia [SAR406 clade];                                                                     | 97.3                      | 539    | 554      | 4.9                          | 673224                        | 640253             |
| Bacteria;MAT-CR-M4-B07;                                                                                     | 92.0                      | 23     | 25       | 4.9                          | 673753                        | 640769             |
| Bacteria;Modulibacteria;                                                                                    | 85.9                      | 219    | 255      | 4.9                          | 673523                        | 640573             |
| Bacteria;Nitrospirae;                                                                                       | 98.6                      | 359    | 364      | 4.9                          | 673414                        | 640433             |
| Bacteria;Nitrospirae;                                                                                       | 96.2                      | 1245   | 1294     | 4.9                          | 672484                        | 639547             |
| Bacteria;Omnitrophicaeota;                                                                                  | 96.3                      | 488    | 507      | 4.9                          | 673271                        | 640304             |
| Bacteria;Patescibacteria;                                                                                   | 65.6                      | 2964   | 4521     | 4.7                          | 669257                        | 637828             |
| Bacteria;PAUC34f;                                                                                           | 98.9                      | 87     | 88       | 4.9                          | 673690                        | 640705             |
| Bacteria;Poribacteria;                                                                                      | 10.2                      | 5      | 49       | 4.9                          | 673729                        | 640787             |
| Bacteria;Protobacteria;                                                                                     | 96.8                      | 222363 | 229805   | 5.8                          | 443973                        | 418429             |
| Bacteria;Rokubacteria;                                                                                      | 98.4                      | 374    | 380      | 4.9                          | 673398                        | 640418             |
| Bacteria;RsaHF231;                                                                                          | 100.0                     | 8      | 8        | 4.9                          | 673770                        | 640784             |
| Bacteria;Schekmanbacteria;                                                                                  | 97.5                      | 39     | 40       | 4.9                          | 673738                        | 640753             |
| Bacteria;Spirochaetes;                                                                                      | 95.3                      | 4001   | 4200     | 4.9                          | 669578                        | 636791             |
| Bacteria;Synergistetes;                                                                                     | 91.7                      | 1111   | 1138     | 4.9                          | 672640                        | 639681             |
| Bacteria;TAD6;                                                                                              | 98.5                      | 67     | 68       | 4.9                          | 673710                        | 640725             |
| Bacteria;Tenericutes;                                                                                       | 88.1                      | 2199   | 2497     | 4.9                          | 671281                        | 638593             |
| Bacteria;Thermosulfidibacteraeota;                                                                          | 100.0                     | 3      | 3        | 4.9                          | 673775                        | 640789             |
| Bacteria;Thermotogae;                                                                                       | 95.9                      | 280    | 292      | 4.9                          | 673486                        | 640512             |
| Bacteria;uncultured;                                                                                        | 100.0                     | 5      | 5        | 4.9                          | 673773                        | 640787             |
| Bacteria;Verrucomicrobia;                                                                                   | 95.0                      | 4189   | 4411     | 4.9                          | 669367                        | 636603             |
| Bacteria;WDR-1;                                                                                             | 100.0                     | 34     | 34       | 4.9                          | 673744                        | 640758             |
| Bacteria;WPS-2;                                                                                             | 98.0                      | 50     | 51       | 4.9                          | 673727                        | 640742             |
| Bacteria;WS1;                                                                                               | 95.7                      | 89     | 93       | 4.9                          | 673685                        | 640703             |
| Bacteria;WS2;                                                                                               | 93.1                      | 54     | 58       | 4.9                          | 673720                        | 640738             |
| Bacteria;WS4;                                                                                               | 100.0                     | 16     | 16       | 4.9                          | 673762                        | 640776             |
| Bacteria;Zixibacteria;                                                                                      | 97.0                      | 197    | 203      | 4.9                          | 673575                        | 640595             |
| Eukaryota;                                                                                                  | 93.0                      | 68767  | 73929    | 4.6                          | 599849                        | 572025             |

a= SILVA taxonomy, SSU r132 database; RefNR Sequence Collection  
b=(match/eligible)\*100  
c=number of match hits in the taxa path.  
d=number of hits whitesequence data at the primers position in the taxa path  
e=100\*(outgroup\_matches/outgroup\_matchable)\*100  
f=number of matched hits outside the taxonomic path  
g=number of matchable hits outside the taxonomic path

Table S9: In silico evaluation of specificity and coverage rate of primer pairs proposed by Parada et al., (15) allowing two mismatch.

| Taxonomy <sup>a</sup>                                                                                 | coverage (%) <sup>b</sup> | Match <sup>c</sup> | Eligible <sup>d</sup> | specificity (%) <sup>e</sup> | outgroup matched <sup>f</sup> | outgroup matchable |
|-------------------------------------------------------------------------------------------------------|---------------------------|--------------------|-----------------------|------------------------------|-------------------------------|--------------------|
| Archaea;                                                                                              | 94.0                      | 23132              | 24615                 | 3.6                          | 649163                        | 625721             |
| Bacteria;                                                                                             | 96.6                      | 555910             | 575261                | 5.7                          | 98517                         | 92943              |
| Bacteria;Acetothermia;                                                                                | 95.8                      | 158                | 165                   | 3.7                          | 673613                        | 648695             |
| Bacteria;Acidobacteria;                                                                               | 97.8                      | 14215              | 14532                 | 3.7                          | 659246                        | 634638             |
| Bacteria;Actinobacteria;                                                                              | 96.4                      | 57368              | 59486                 | 3.7                          | 614292                        | 591485             |
| Bacteria;Aegiribacteria;                                                                              | 96.2                      | 50                 | 52                    | 3.7                          | 673726                        | 648803             |
| Bacteria;Aerophobetes;                                                                                | 100.0                     | 66                 | 66                    | 3.7                          | 673712                        | 648787             |
| Bacteria;Anck6;                                                                                       | 95.2                      | 20                 | 21                    | 3.7                          | 673757                        | 648833             |
| Bacteria;Anquilifae;                                                                                  | 97.6                      | 329                | 337                   | 3.7                          | 673441                        | 648524             |
| Bacteria;Armatimonadetes;                                                                             | 96.4                      | 723                | 750                   | 3.7                          | 673028                        | 648130             |
| Bacteria;Atribacteria;                                                                                | 97.8                      | 565                | 578                   | 3.7                          | 673200                        | 648288             |
| Bacteria;Bacteroidetes;                                                                               | 96.6                      | 53424              | 55295                 | 3.7                          | 618483                        | 595429             |
| Bacteria;BH180-139;                                                                                   | 97.6                      | 40                 | 41                    | 3.7                          | 673737                        | 648813             |
| Bacteria;BRC1;                                                                                        | 95.8                      | 364                | 380                   | 3.7                          | 673398                        | 648489             |
| Bacteria;Caldiserica;                                                                                 | 93.7                      | 89                 | 95                    | 3.7                          | 673683                        | 648764             |
| Bacteria;Calditrichaeta;                                                                              | 94.5                      | 260                | 275                   | 3.7                          | 673503                        | 648593             |
| Bacteria;Calescamantes;                                                                               | 100.0                     | 3                  | 3                     | 3.7                          | 673775                        | 648850             |
| Bacteria;Chlamydiae;                                                                                  | 95.9                      | 374                | 390                   | 3.7                          | 673388                        | 648479             |
| Bacteria;Chloroflexi;                                                                                 | 96.4                      | 8891               | 9226                  | 3.7                          | 664552                        | 639962             |
| Bacteria;Chrysiogenetes;                                                                              | 90.0                      | 9                  | 10                    | 3.7                          | 673768                        | 648844             |
| Bacteria;CK-2C2-2;                                                                                    | 100.0                     | 21                 | 21                    | 3.7                          | 673757                        | 648832             |
| Bacteria;Cloacimonetes;                                                                               | 94.3                      | 283                | 300                   | 3.7                          | 673478                        | 648570             |
| Bacteria;Coprothermobacteraeota;                                                                      | 98.6                      | 73                 | 74                    | 3.7                          | 673704                        | 648780             |
| Bacteria;Cyanobacteria;                                                                               | 95.4                      | 12850              | 13467                 | 3.7                          | 660311                        | 636003             |
| Bacteria;Cyanobacteria;Melainabacteria;                                                               | 97.5                      | 497                | 510                   | 3.7                          | 673268                        | 648356             |
| Bacteria;Cyanobacteria;Oxyphotobacteria;                                                              | 95.3                      | 12271              | 12875                 | 3.7                          | 660903                        | 636582             |
| Bacteria;Cyanobacteria;Oxyphotobacteria;Chloroplast;                                                  | 93.6                      | 5656               | 6041                  | 3.7                          | 667737                        | 643197             |
| Bacteria;Cyanobacteria;Oxyphotobacteria;Eurycoccales;                                                 | 97.8                      | 44                 | 45                    | 3.7                          | 673733                        | 648809             |
| Bacteria;Cyanobacteria;Oxyphotobacteria;Fr127;                                                        | 100.0                     | 4                  | 4                     | 3.7                          | 673774                        | 648849             |
| Bacteria;Cyanobacteria;Oxyphotobacteria;Geitlerinetales;                                              | 100.0                     | 1                  | 1                     | 3.7                          | 673777                        | 648852             |
| Bacteria;Cyanobacteria;Oxyphotobacteria;Gloeobacterales;                                              | 100.0                     | 8                  | 8                     | 3.7                          | 673770                        | 648845             |
| Bacteria;Cyanobacteria;Oxyphotobacteria;Leptolyngbales;                                               | 96.4                      | 190                | 197                   | 3.7                          | 673581                        | 648663             |
| Bacteria;Cyanobacteria;Oxyphotobacteria;Limnotrichales;                                               | 100.0                     | 17                 | 17                    | 3.7                          | 673761                        | 648836             |
| Bacteria;Cyanobacteria;Oxyphotobacteria;Nesostococcales;                                              | 100.0                     | 1                  | 1                     | 3.7                          | 673777                        | 648852             |
| Bacteria;Cyanobacteria;Oxyphotobacteria;Nostocales;                                                   | 96.9                      | 3651               | 3768                  | 3.7                          | 670010                        | 645202             |
| Bacteria;Cyanobacteria;Oxyphotobacteria;Oxyphotobacteria Incertae Sedis;                              | 95.4                      | 472                | 495                   | 3.7                          | 673283                        | 648381             |
| Bacteria;Cyanobacteria;Oxyphotobacteria;Phormidemiales;                                               | 95.2                      | 277                | 291                   | 3.7                          | 673487                        | 648576             |
| Bacteria;Cyanobacteria;Oxyphotobacteria;Pseudanabaenales;                                             | 99.0                      | 101                | 102                   | 3.7                          | 673676                        | 648752             |
| Bacteria;Cyanobacteria;Oxyphotobacteria;RD011;                                                        | 100.0                     | 8                  | 8                     | 3.7                          | 673770                        | 648845             |
| Bacteria;Cyanobacteria;Oxyphotobacteria;RD017;                                                        | 91.7                      | 11                 | 12                    | 3.7                          | 673766                        | 648842             |
| Bacteria;Cyanobacteria;Oxyphotobacteria;SepB-3;                                                       | 100.0                     | 8                  | 8                     | 3.7                          | 673770                        | 648845             |
| Bacteria;Cyanobacteria;Oxyphotobacteria;Synecococcales;                                               | 97.0                      | 1767               | 1821                  | 3.7                          | 671957                        | 647086             |
| <b>Bacteria;Cyanobacteria;Oxyphotobacteria;Synecococcales;Cyanobiaceae;</b>                           | <b>97.0</b>               | <b>1731</b>        | <b>1785</b>           | <b>3.7</b>                   | <b>671993</b>                 | <b>647122</b>      |
| <b>Bacteria;Cyanobacteria;Oxyphotobacteria;Synecococcales;Cyanobiaceae;Cyanobium PCC-6307;</b>        | <b>98.5</b>               | <b>640</b>         | <b>650</b>            | <b>3.7</b>                   | <b>673128</b>                 | <b>648213</b>      |
| <b>Bacteria;Cyanobacteria;Oxyphotobacteria;Synecococcales;Cyanobiaceae;Prochlorococcus MIT9313;</b>   | <b>91.6</b>               | <b>413</b>         | <b>451</b>            | <b>3.7</b>                   | <b>673327</b>                 | <b>648440</b>      |
| <b>Bacteria;Cyanobacteria;Oxyphotobacteria;Synecococcales;Cyanobiaceae;Synecococcus CC9902;</b>       | <b>99.1</b>               | <b>630</b>         | <b>636</b>            | <b>3.7</b>                   | <b>673142</b>                 | <b>648223</b>      |
| Bacteria;Cyanobacteria;Oxyphotobacteria;Synecococcales;Cyanobiaceae;Synecococcus MBIC10613;           | 100.0                     | 5                  | 5                     | 3.7                          | 673773                        | 648848             |
| Bacteria;Cyanobacteria;Oxyphotobacteria;Synecococcales;Cyanobiaceae;Synecococcus [spongiarium group]; | 100.0                     | 42                 | 42                    | 3.7                          | 673736                        | 648811             |
| Bacteria;Cyanobacteria;Oxyphotobacteria;Synecococcales;Prochlororichaceae;                            | 100.0                     | 11                 | 11                    | 3.7                          | 673767                        | 648842             |
| Bacteria;Cyanobacteria;Oxyphotobacteria;Synecococcales;Synecococaceae;                                | 100.0                     | 15                 | 15                    | 3.7                          | 673763                        | 648838             |
| Bacteria;Cyanobacteria;Oxyphotobacteria;Thermosynechococcales;                                        | 98.0                      | 49                 | 50                    | 3.7                          | 673728                        | 648804             |
| Bacteria;Cyanobacteria;Oxyphotobacteria;Uncultured;                                                   | 100.0                     | 4                  | 4                     | 3.7                          | 673774                        | 648849             |
| Bacteria;Cyanobacteria;Sericytochromatia;                                                             | 100.0                     | 82                 | 82                    | 3.7                          | 673696                        | 648771             |
| Bacteria;Dadabacteria;                                                                                | 98.2                      | 166                | 169                   | 3.7                          | 673609                        | 648687             |
| Bacteria;Deferribacteres;                                                                             | 97.7                      | 127                | 130                   | 3.7                          | 673648                        | 648726             |
| Bacteria;Deinococcus-Thermus;                                                                         | 97.2                      | 888                | 914                   | 3.7                          | 672864                        | 647965             |
| Bacteria;Dependentiae;                                                                                | 97.1                      | 563                | 580                   | 3.7                          | 673198                        | 648290             |
| Bacteria;Desantisbacteria;                                                                            | 100.0                     | 2                  | 2                     | 3.7                          | 673776                        | 648851             |
| Bacteria;Dictyoglomi;                                                                                 | 88.9                      | 8                  | 9                     | 3.7                          | 673769                        | 648845             |
| Bacteria;Edwardsiibacteria;                                                                           | 75.0                      | 3                  | 4                     | 3.7                          | 673774                        | 648850             |
| Bacteria;Elusimicrobia;                                                                               | 96.9                      | 421                | 435                   | 3.7                          | 673343                        | 648432             |
| Bacteria;Entotheonellaeota;                                                                           | 100.0                     | 168                | 168                   | 3.7                          | 673610                        | 648685             |
| Bacteria;Epsilonbacteraeota;                                                                          | 97.8                      | 5054               | 5167                  | 3.7                          | 668611                        | 643799             |
| Bacteria;FBP;                                                                                         | 99.4                      | 154                | 155                   | 3.7                          | 673623                        | 648699             |
| Bacteria;FCPU426;                                                                                     | 91.9                      | 34                 | 37                    | 3.7                          | 673741                        | 648819             |
| Bacteria;Fervidibacteria;                                                                             | 100.0                     | 4                  | 4                     | 3.7                          | 673774                        | 648849             |
| Bacteria;Fibrobacteres;                                                                               | 94.5                      | 706                | 747                   | 3.7                          | 673031                        | 648147             |
| Bacteria;Firestonebacteria;                                                                           | 100.0                     | 3                  | 3                     | 3.7                          | 673775                        | 648850             |
| Bacteria;Firmicutes;                                                                                  | 96.0                      | 138350             | 144050                | 3.6                          | 529728                        | 510503             |
| Bacteria;Fusobacteria;                                                                                | 92.4                      | 2012               | 2177                  | 3.7                          | 671601                        | 646841             |
| Bacteria;GAL15;                                                                                       | 100.0                     | 43                 | 43                    | 3.7                          | 673735                        | 648810             |
| Bacteria;GBS-1;                                                                                       | 100.0                     | 2                  | 2                     | 3.7                          | 673776                        | 648851             |
| Bacteria;Gemmatimonadetes;                                                                            | 96.9                      | 2117               | 2184                  | 3.7                          | 671594                        | 646736             |
| Bacteria;GN01;                                                                                        | 85.8                      | 103                | 120                   | 3.7                          | 673658                        | 648750             |
| Bacteria;Halanaerobiaeota;                                                                            | 93.7                      | 237                | 253                   | 3.7                          | 673525                        | 648616             |
| Bacteria;Hydrogenedentes;                                                                             | 98.5                      | 267                | 271                   | 3.7                          | 673507                        | 648586             |
| Bacteria;Hydrothermae;                                                                                | 100.0                     | 38                 | 38                    | 3.7                          | 673740                        | 648815             |
| Bacteria;Kiritimatillaeta;                                                                            | 96.4                      | 940                | 975                   | 3.7                          | 672803                        | 647913             |
| Bacteria;Latescibacteria;                                                                             | 97.0                      | 482                | 497                   | 3.7                          | 673281                        | 648371             |
| Bacteria;LCP-89;                                                                                      | 97.8                      | 45                 | 46                    | 3.7                          | 673732                        | 648808             |
| Bacteria;Lentisphaerae;                                                                               | 97.4                      | 457                | 469                   | 3.7                          | 673309                        | 648396             |
| Bacteria;Lindowbacteria;                                                                              | 100.0                     | 1                  | 1                     | 3.7                          | 673777                        | 648852             |
| Bacteria;Margulisbacteria;                                                                            | 98.8                      | 85                 | 86                    | 3.7                          | 673692                        | 648768             |
| Bacteria;Marrnicrobia (SAR406 clade);                                                                 | 97.7                      | 541                | 554                   | 3.7                          | 673224                        | 648312             |
| Bacteria;MAT-CP-M4-B07;                                                                               | 96.0                      | 24                 | 25                    | 3.7                          | 673753                        | 648829             |
| Bacteria;Modulibacteria;                                                                              | 89.8                      | 229                | 255                   | 3.7                          | 673523                        | 648624             |
| Bacteria;Nitrospinae;                                                                                 | 98.6                      | 359                | 364                   | 3.7                          | 673414                        | 648494             |
| Bacteria;Omnitrophicaeota;                                                                            | 96.6                      | 490                | 507                   | 3.7                          | 673271                        | 648363             |
| Bacteria;Patescibacteria;                                                                             | 86.9                      | 3930               | 4521                  | 3.6                          | 669257                        | 644923             |
| Bacteria;PAUC34f;                                                                                     | 98.9                      | 87                 | 88                    | 3.7                          | 673690                        | 648766             |
| Bacteria;Planctomycetes;                                                                              | 96.7                      | 8709               | 9002                  | 3.7                          | 664776                        | 640144             |
| Bacteria;Poribacteria;                                                                                | 81.6                      | 40                 | 49                    | 3.7                          | 673729                        | 648813             |
| Bacteria;Proteobacteria;                                                                              | 97.4                      | 223752             | 229805                | 4.3                          | 443973                        | 425101             |
| Bacteria;Rokubacteria;                                                                                | 98.4                      | 374                | 380                   | 3.7                          | 673398                        | 648479             |
| Bacteria;RsaHF231;                                                                                    | 100.0                     | 8                  | 8                     | 3.7                          | 673770                        | 648845             |
| Bacteria;Schekmanbacteria;                                                                            | 97.5                      | 39                 | 40                    | 3.7                          | 673738                        | 648814             |
| Bacteria;Spirochaetes;                                                                                | 96.1                      | 4038               | 4200                  | 3.7                          | 669578                        | 644815             |
| Bacteria;Synergistetes;                                                                               | 98.4                      | 1120               | 1138                  | 3.7                          | 672640                        | 647733             |
| Bacteria;TA06;                                                                                        | 100.0                     | 68                 | 68                    | 3.7                          | 673710                        | 648785             |
| Bacteria;Tenericutes;                                                                                 | 89.1                      | 2224               | 2497                  | 3.7                          | 671281                        | 646629             |
| Bacteria;Thermosulfidibacteraeota;                                                                    | 100.0                     | 3                  | 3                     | 3.7                          | 673775                        | 648850             |
| Bacteria;Thermotogae;                                                                                 | 96.9                      | 283                | 292                   | 3.7                          | 673486                        | 648570             |
| Bacteria;uncultured;                                                                                  | 100.0                     | 5                  | 5                     | 3.7                          | 673773                        | 648848             |
| Bacteria;Verrucomicrobia;                                                                             | 96.0                      | 4236               | 4411                  | 3.7                          | 669367                        | 644617             |
| Bacteria;WOR-1;                                                                                       | 100.0                     | 34                 | 34                    | 3.7                          | 673744                        | 648819             |
| Bacteria;WPS-2;                                                                                       | 98.0                      | 50                 | 51                    | 3.7                          | 673727                        | 648803             |
| Bacteria;WS1;                                                                                         | 98.9                      | 92                 | 93                    | 3.7                          | 673685                        | 648761             |
| Bacteria;WS2;                                                                                         | 93.1                      | 54                 | 58                    | 3.7                          | 673720                        | 648799             |
| Bacteria;WS4;                                                                                         | 100.0                     | 16                 | 16                    | 3.7                          | 673762                        | 648837             |
| Bacteria;Zixibacteria;                                                                                | 98.0                      | 199                | 203                   | 3.7                          | 673575                        | 648654             |
| Eukaryota;                                                                                            | 94.5                      | 69836              | 73929                 | 3.5                          | 598949                        | 579017             |

a= SILVA taxonomy, SSU r132 database; RefNR Sequence Collection  
b=(match/[eligible])\*100  
c=number of match hits in the taxa path.  
d=number of hits with sequence data at the primers position in the taxa path  
e=100\*(outgroup\_matches/outgroup\_matchable)\*100  
f=number of matched hits outside the taxonomic path  
g=number of matchable hits outside the taxonomic path

**Table S10:** zOTU list with taxonomic affiliation (based on the SILVA database SSU r132) and sequence abundance in each sample.

| zOTUId   | Blanes Spring (Apr-13) | Blanes Summer (Aug-13) | Chascomús Spring (Oct-12) | Chascomús Winter (Jun-13) | Chascomús Spring (Nov-13) | Chascomús Summer (Feb-14) | Chascomús Autumn (May-14) | El Carpino Spring (Dic-09) | Bragado Spring (Dic-09) | Monte Spring (Dic-09) | Taxonomy                                                                                                                                 | Similarity (%) | Alignment Length(bp) |
|----------|------------------------|------------------------|---------------------------|---------------------------|---------------------------|---------------------------|---------------------------|----------------------------|-------------------------|-----------------------|------------------------------------------------------------------------------------------------------------------------------------------|----------------|----------------------|
| zOTU_17  | 9                      | 445                    | 0                         | 0                         | 0                         | 0                         | 0                         | 0                          | 0                       | 0                     | KF217075_Bacteria;Cyanobacteria;Oxyphotobacteria;Synechococcales;Cyanobacteria;Synechococcus CC9902;uncultured bacterium                 | 100.000        | 542                  |
| zOTU_9   | 1813                   | 5884                   | 0                         | 0                         | 0                         | 0                         | 0                         | 0                          | 0                       | 0                     | KM520687_Bacteria;Cyanobacteria;Oxyphotobacteria;Synechococcales;Cyanobacteria;Synechococcus CC9902;uncultured bacterium                 | 100.000        | 542                  |
| zOTU_37  | 241                    | 37                     | 0                         | 0                         | 0                         | 0                         | 0                         | 0                          | 0                       | 0                     | KM520687_Bacteria;Cyanobacteria;Oxyphotobacteria;Synechococcales;Cyanobacteria;Synechococcus CC9902;uncultured bacterium                 | 99.815         | 542                  |
| zOTU_3   | 157                    | 1313                   | 0                         | 0                         | 0                         | 0                         | 0                         | 0                          | 0                       | 0                     | KX937164_Bacteria;Cyanobacteria;Oxyphotobacteria;Synechococcales;Cyanobacteria;Synechococcus CC9902;uncultured marine cyanobacterium     | 100.000        | 542                  |
| zOTU_18  | 70                     | 1064                   | 0                         | 0                         | 0                         | 0                         | 0                         | 0                          | 0                       | 0                     | KX937164_Bacteria;Cyanobacteria;Oxyphotobacteria;Synechococcales;Cyanobacteria;Synechococcus CC9902;uncultured marine cyanobacterium     | 99.815         | 542                  |
| zOTU_25  | 46                     | 1270                   | 0                         | 0                         | 0                         | 0                         | 0                         | 0                          | 0                       | 0                     | GU119191_Bacteria;Cyanobacteria;Oxyphotobacteria;Synechococcales;Cyanobacteria;Synechococcus CC9902;uncultured bacterium                 | 99.815         | 542                  |
| zOTU_13  | 11                     | 799                    | 0                         | 0                         | 0                         | 0                         | 0                         | 0                          | 0                       | 0                     | KC000289_Bacteria;Cyanobacteria;Oxyphotobacteria;Synechococcales;Cyanobacteria;Synechococcus CC9902;unidentified marine bacterioplankton | 100.000        | 542                  |
| zOTU_50  | 4                      | 93                     | 0                         | 0                         | 0                         | 0                         | 0                         | 0                          | 0                       | 0                     | KC000289_Bacteria;Cyanobacteria;Oxyphotobacteria;Synechococcales;Cyanobacteria;Synechococcus CC9902;unidentified marine bacterioplankton | 99.815         | 542                  |
| zOTU_100 | 3                      | 161                    | 0                         | 0                         | 0                         | 0                         | 0                         | 0                          | 0                       | 0                     | KC000289_Bacteria;Cyanobacteria;Oxyphotobacteria;Synechococcales;Cyanobacteria;Synechococcus CC9902;unidentified marine bacterioplankton | 99.631         | 542                  |
| zOTU_105 | 3                      | 152                    | 0                         | 0                         | 0                         | 0                         | 0                         | 0                          | 0                       | 0                     | GU119191_Bacteria;Cyanobacteria;Oxyphotobacteria;Synechococcales;Cyanobacteria;Synechococcus CC9902;uncultured bacterium                 | 99.631         | 542                  |
| zOTU_101 | 130                    | 5                      | 0                         | 0                         | 0                         | 0                         | 0                         | 0                          | 0                       | 0                     | KM520687_Bacteria;Cyanobacteria;Oxyphotobacteria;Synechococcales;Cyanobacteria;Synechococcus CC9902;uncultured bacterium                 | 99.631         | 542                  |
| zOTU_38  | 5                      | 445                    | 0                         | 0                         | 0                         | 0                         | 0                         | 0                          | 0                       | 0                     | AA0K1000002_Bacteria;Cyanobacteria;Oxyphotobacteria;Synechococcales;Cyanobacteria;Synechococcus CC9902;uncultured bacterium              | 100.000        | 542                  |
| zOTU_54  | 4                      | 284                    | 0                         | 0                         | 0                         | 0                         | 0                         | 0                          | 0                       | 0                     | GU061474_Bacteria;Cyanobacteria;Oxyphotobacteria;Synechococcales;Cyanobacteria;uncultured bacterium                                      | 99.446         | 542                  |
| zOTU_1   | 150                    | 1997                   | 0                         | 0                         | 0                         | 0                         | 0                         | 0                          | 0                       | 0                     | KX934805_Bacteria;Cyanobacteria;Oxyphotobacteria;Synechococcales;Cyanobacteria;uncultured marine cyanobacterium                          | 100.000        | 542                  |
| zOTU_31  | 37                     | 403                    | 0                         | 0                         | 0                         | 0                         | 0                         | 0                          | 0                       | 0                     | KX934805_Bacteria;Cyanobacteria;Oxyphotobacteria;Synechococcales;Cyanobacteria;uncultured marine cyanobacterium                          | 99.631         | 542                  |
| zOTU_4   | 51                     | 2150                   | 0                         | 0                         | 0                         | 0                         | 0                         | 0                          | 0                       | 0                     | GU119191_Bacteria;Cyanobacteria;Oxyphotobacteria;Synechococcales;Cyanobacteria;Synechococcus CC9902;uncultured bacterium                 | 100.000        | 542                  |
| zOTU_21  | 20                     | 648                    | 0                         | 0                         | 0                         | 0                         | 0                         | 0                          | 0                       | 0                     | GU119191_Bacteria;Cyanobacteria;Oxyphotobacteria;Synechococcales;Cyanobacteria;Synechococcus CC9902;uncultured bacterium                 | 99.815         | 542                  |
| zOTU_110 | 15                     | 441                    | 0                         | 0                         | 0                         | 0                         | 0                         | 0                          | 0                       | 0                     | KX934805_Bacteria;Cyanobacteria;Oxyphotobacteria;Synechococcales;Cyanobacteria;uncultured marine cyanobacterium                          | 99.631         | 542                  |
| zOTU_67  | 12                     | 315                    | 0                         | 0                         | 0                         | 0                         | 0                         | 0                          | 0                       | 0                     | KX937164_Bacteria;Cyanobacteria;Oxyphotobacteria;Synechococcales;Cyanobacteria;Synechococcus CC9902;uncultured marine cyanobacterium     | 99.631         | 542                  |
| zOTU_56  | 6                      | 108                    | 0                         | 0                         | 0                         | 0                         | 0                         | 0                          | 0                       | 0                     | GU119191_Bacteria;Cyanobacteria;Oxyphotobacteria;Synechococcales;Cyanobacteria;Synechococcus CC9902;uncultured bacterium                 | 99.631         | 542                  |
| zOTU_91  | 4                      | 81                     | 0                         | 0                         | 0                         | 0                         | 0                         | 0                          | 0                       | 0                     | KC000289_Bacteria;Cyanobacteria;Oxyphotobacteria;Synechococcales;Cyanobacteria;Synechococcus CC9902;unidentified marine bacterioplankton | 99.631         | 542                  |
| zOTU_104 | 0                      | 0                      | 67                        | 74                        | 12                        | 9                         | 3                         | 3                          | 0                       | 0                     | KU841560_Bacteria;Cyanobacteria;Oxyphotobacteria;Synechococcales;Cyanobacteria;uncultured Cyanobium sp.                                  | 99.631         | 542                  |
| zOTU_108 | 0                      | 0                      | 63                        | 0                         | 76                        | 12                        | 13                        | 3                          | 0                       | 0                     | KU841560_Bacteria;Cyanobacteria;Oxyphotobacteria;Synechococcales;Cyanobacteria;uncultured Cyanobium sp.                                  | 99.631         | 542                  |
| zOTU_109 | 0                      | 0                      | 2                         | 0                         | 1                         | 0                         | 0                         | 26                         | 0                       | 4                     | KU841560_Bacteria;Cyanobacteria;Oxyphotobacteria;Synechococcales;Cyanobacteria;uncultured Cyanobium sp.                                  | 98.893         | 542                  |
| zOTU_11  | 0                      | 0                      | 15                        | 0                         | 9                         | 8                         | 11                        | 850                        | 0                       | 40                    | KU841560_Bacteria;Cyanobacteria;Oxyphotobacteria;Synechococcales;Cyanobacteria;uncultured Cyanobium sp.                                  | 99.262         | 542                  |
| zOTU_118 | 0                      | 0                      | 3                         | 1                         | 1                         | 3                         | 1                         | 2                          | 3                       | 3                     | AB935892_Bacteria;Cyanobacteria;Oxyphotobacteria;Synechococcales;Cyanobacteria;Cyanobium PCC-6307;uncultured cyanobacterium              | 99.631         | 542                  |
| zOTU_20  | 0                      | 0                      | 51                        | 73                        | 56                        | 19                        | 83                        | 234                        | 126                     | 1216                  | AB935892_Bacteria;Cyanobacteria;Oxyphotobacteria;Synechococcales;Cyanobacteria;Cyanobium PCC-6307;uncultured cyanobacterium              | 100.000        | 542                  |
| zOTU_24  | 0                      | 0                      | 285                       | 0                         | 189                       | 51                        | 54                        | 5                          | 0                       | 0                     | KU841560_Bacteria;Cyanobacteria;Oxyphotobacteria;Synechococcales;Cyanobacteria;uncultured Cyanobium sp.                                  | 99.815         | 542                  |
| zOTU_102 | 0                      | 0                      | 6                         | 0                         | 5                         | 4                         | 141                       | 511                        | 24                      | 66                    | DQ275599_Bacteria;Cyanobacteria;Oxyphotobacteria;Synechococcales;Cyanobacteria;Cyanobium PCC-6307;Synechococcus sp. B9801                | 100.000        | 542                  |
| zOTU_43  | 0                      | 0                      | 9                         | 0                         | 4                         | 2                         | 2                         | 266                        | 1                       | 8                     | KU841560_Bacteria;Cyanobacteria;Oxyphotobacteria;Synechococcales;Cyanobacteria;uncultured Cyanobium sp.                                  | 99.077         | 542                  |
| zOTU_45  | 0                      | 0                      | 78                        | 0                         | 396                       | 81                        | 128                       | 7                          | 2                       | 0                     | GU061474_Bacteria;Cyanobacteria;Oxyphotobacteria;Synechococcales;Cyanobacteria;uncultured bacterium                                      | 99.077         | 542                  |
| zOTU_62  | 0                      | 0                      | 14                        | 24                        | 9                         | 2                         | 9                         | 32                         | 19                      | 136                   | AB935892_Bacteria;Cyanobacteria;Oxyphotobacteria;Synechococcales;Cyanobacteria;Cyanobium PCC-6307;uncultured cyanobacterium              | 99.815         | 542                  |
| zOTU_75  | 0                      | 0                      | 5                         | 0                         | 7                         | 1                         | 4                         | 79                         | 0                       | 4                     | KU841560_Bacteria;Cyanobacteria;Oxyphotobacteria;Synechococcales;Cyanobacteria;uncultured Cyanobium sp.                                  | 98.893         | 542                  |
| zOTU_76  | 0                      | 0                      | 11                        | 43                        | 7                         | 8                         | 6                         | 166                        | 15                      | 8                     | DQ300610_Bacteria;Cyanobacteria;Oxyphotobacteria;Synechococcales;Cyanobacteria;uncultured bacterium                                      | 99.262         | 542                  |
| zOTU_77  | 0                      | 0                      | 6                         | 3                         | 5                         | 4                         | 2                         | 166                        | 16                      | 6                     | KU841560_Bacteria;Cyanobacteria;Oxyphotobacteria;Synechococcales;Cyanobacteria;uncultured Cyanobium sp.                                  | 99.893         | 542                  |
| zOTU_85  | 0                      | 0                      | 197                       | 1                         | 294                       | 66                        | 139                       | 4                          | 0                       | 0                     | KU841560_Bacteria;Cyanobacteria;Oxyphotobacteria;Synechococcales;Cyanobacteria;uncultured Cyanobium sp.                                  | 99.262         | 542                  |
| zOTU_89  | 0                      | 0                      | 52                        | 0                         | 70                        | 12                        | 12                        | 2                          | 0                       | 0                     | KU841560_Bacteria;Cyanobacteria;Oxyphotobacteria;Synechococcales;Cyanobacteria;uncultured Cyanobium sp.                                  | 99.262         | 543                  |
| zOTU_93  | 0                      | 0                      | 7                         | 1                         | 7                         | 1                         | 10                        | 120                        | 2                       | 5                     | KU841560_Bacteria;Cyanobacteria;Oxyphotobacteria;Synechococcales;Cyanobacteria;uncultured Cyanobium sp.                                  | 98.893         | 542                  |
| zOTU_114 | 0                      | 0                      | 0                         | 0                         | 1                         | 1                         | 0                         | 1                          | 0                       | 1                     | KU841569_Bacteria;Cyanobacteria;Oxyphotobacteria;Synechococcales;Cyanobacteria;Cyanobium PCC-6307;uncultured Synechococcus sp.           | 99.446         | 542                  |
| zOTU_23  | 0                      | 0                      | 26                        | 101                       | 43                        | 32                        | 84                        | 123                        | 236                     | 195                   | KU841569_Bacteria;Cyanobacteria;Oxyphotobacteria;Synechococcales;Cyanobacteria;Cyanobium PCC-6307;uncultured Synechococcus sp.           | 99.815         | 542                  |
| zOTU_26  | 0                      | 0                      | 12                        | 45                        | 13                        | 7                         | 31                        | 40                         | 103                     | 85                    | KU841569_Bacteria;Cyanobacteria;Oxyphotobacteria;Synechococcales;Cyanobacteria;Cyanobium PCC-6307;uncultured Synechococcus sp.           | 99.815         | 542                  |
| zOTU_27  | 0                      | 0                      | 25                        | 63                        | 20                        | 27                        | 55                        | 74                         | 204                     | 141                   | KU841569_Bacteria;Cyanobacteria;Oxyphotobacteria;Synechococcales;Cyanobacteria;Cyanobium PCC-6307;uncultured Synechococcus sp.           | 99.815         | 542                  |
| zOTU_29  | 0                      | 0                      | 13                        | 42                        | 12                        | 15                        | 34                        | 66                         | 133                     | 132                   | KU841569_Bacteria;Cyanobacteria;Oxyphotobacteria;Synechococcales;Cyanobacteria;Cyanobium PCC-6307;uncultured Synechococcus sp.           | 99.815         | 542                  |
| zOTU_5   | 0                      | 0                      | 126                       | 274                       | 121                       | 137                       | 330                       | 459                        | 94                      | 815                   | KU841569_Bacteria;Cyanobacteria;Oxyphotobacteria;Synechococcales;Cyanobacteria;Cyanobium PCC-6307;uncultured Synechococcus sp.           | 100.000        | 542                  |
| zOTU_83  | 0                      | 0                      | 4                         | 19                        | 4                         | 6                         | 24                        | 39                         | 68                      | 77                    | KU841569_Bacteria;Cyanobacteria;Oxyphotobacteria;Synechococcales;Cyanobacteria;Cyanobium PCC-6307;uncultured Synechococcus sp.           | 99.631         | 542                  |
| zOTU_94  | 0                      | 0                      | 11                        | 4                         | 3                         | 5                         | 17                        | 43                         | 8                       | 7                     | KU841569_Bacteria;Cyanobacteria;Oxyphotobacteria;Synechococcales;Cyanobacteria;Cyanobium PCC-6307;uncultured Synechococcus sp.           | 99.631         | 542                  |
| zOTU_96  | 0                      | 0                      | 14                        | 38                        | 18                        | 27                        | 31                        | 64                         | 114                     | 203                   | KU841569_Bacteria;Cyanobacteria;Oxyphotobacteria;Synechococcales;Cyanobacteria;Cyanobium PCC-6307;uncultured Synechococcus sp.           | 99.631         | 542                  |
| zOTU_32  | 0                      | 0                      | 6                         | 0                         | 0                         | 0                         | 0                         | 0                          | 0                       | 0                     | KU841564_Bacteria;Cyanobacteria;Oxyphotobacteria;Synechococcales;Cyanobacteria;uncultured Cyanobium sp.                                  | 99.815         | 542                  |
| zOTU_78  | 65                     | 125                    | 0                         | 0                         | 0                         | 0                         | 0                         | 0                          | 0                       | 0                     | BX548174_Bacteria;Cyanobacteria;Oxyphotobacteria;Synechococcales;Cyanobacteria;Prochlorococcus MIT9313;                                  | 99.631         | 542                  |
| zOTU_74  | 2                      | 50                     | 0                         | 0                         | 0                         | 0                         | 0                         | 0                          | 0                       | 0                     | KU841569_Bacteria;Cyanobacteria;Oxyphotobacteria;Synechococcales;Cyanobacteria;Cyanobium PCC-6307;uncultured Synechococcus sp.           | 99.231         | 542                  |
| zOTU_68  | 0                      | 0                      | 3                         | 0                         | 8                         | 2                         | 18                        | 36                         | 9                       | 4                     | KU841563_Bacteria;Cyanobacteria;Oxyphotobacteria;Synechococcales;Cyanobacteria;Cyanobium PCC-6307;uncultured Synechococcus sp.           | 99.446         | 542                  |
| zOTU_106 | 0                      | 0                      | 17                        | 0                         | 2                         | 6                         | 4                         | 55                         | 6                       | 2                     | EF630354_Bacteria;Cyanobacteria;Oxyphotobacteria;Synechococcales;Cyanobacteria;Synechococcus sp. MLCB                                    | 99.262         | 542                  |
| zOTU_113 | 0                      | 0                      | 2                         | 1                         | 1                         | 5                         | 3                         | 97                         | 12                      | 0                     | EF630354_Bacteria;Cyanobacteria;Oxyphotobacteria;Synechococcales;Cyanobacteria;Synechococcus sp. MLCB                                    | 99.262         | 542                  |
| zOTU_24  | 0                      | 0                      | 276                       | 354                       | 107                       | 85                        | 203                       | 368                        | 157                     | 6                     | EF630354_Bacteria;Cyanobacteria;Oxyphotobacteria;Synechococcales;Cyanobacteria;Synechococcus sp. MLCB                                    | 99.262         | 542                  |
| zOTU_35  | 0                      | 0                      | 17                        | 4                         | 5                         | 6                         | 4                         | 488                        | 51                      | 0                     | EF630354_Bacteria;Cyanobacteria;Oxyphotobacteria;Synechococcales;Cyanobacteria;Synechococcus sp. MLCB                                    | 99.446         | 542                  |
| zOTU_51  | 0                      | 0                      | 23                        | 6                         | 5                         | 6                         | 20                        | 238                        | 20                      | 4                     | AY151245_Bacteria;Cyanobacteria;Oxyphotobacteria;Synechococcales;Cyanobacteria;Cyanobium PCC-6307;Synechococcus sp. MW7682               | 99.631         | 542                  |
| zOTU_53  | 0                      | 0                      | 261                       | 0                         | 8                         | 313                       | 0                         | 0                          | 7                       | 6                     | KU841560_Bacteria;Cyanobacteria;Oxyphotobacteria;Synechococcales;Cyanobacteria;uncultured Cyanobium sp.                                  | 99.631         | 542                  |
| zOTU_7   | 0                      | 0                      | 89                        | 17                        | 19                        | 30                        | 40                        | 2674                       | 281                     | 53                    | EF630354_Bacteria;Cyanobacteria;Oxyphotobacteria;Synechococcales;Cyanobacteria;Synechococcus sp. MLCB                                    | 99.631         | 542                  |
| zOTU_116 | 0                      | 0                      | 6                         | 0                         | 0                         | 2                         | 0                         | 1                          | 1                       | 0                     | KU841564_Bacteria;Cyanobacteria;Oxyphotobacteria;Synechococcales;Cyanobacteria;Cyanobium PCC-6307;uncultured Cyanobium sp.               | 99.815         | 542                  |
| zOTU_34  | 0                      | 0                      | 23                        | 26                        | 10                        | 8                         | 166                       | 16                         | 6                       | 6                     | KC581806_Bacteria;Cyanobacteria;Oxyphotobacteria;Synechococcales;Cyanobacteria;Cyanobium PCC-6307;uncultured bacterium                   | 100.000        | 542                  |
| zOTU_99  | 0                      | 0                      | 4                         | 0                         | 0                         | 0                         | 0                         | 1                          | 1                       | 2                     | KC581806_Bacteria;Cyanobacteria;Oxyphotobacteria;Synechococcales;Cyanobacteria;Cyanobium PCC-6307;uncultured bacterium                   | 99.815         | 542                  |
| zOTU_102 | 0                      | 0                      | 23                        | 2                         | 1                         | 7                         | 2                         | 2                          | 1                       | 1                     | KU841564_Bacteria;Cyanobacteria;Oxyphotobacteria;Synechococcales;Cyanobacteria;Cyanobium PCC-6307;uncultured Cyanobium sp.               | 99.815         | 542                  |
| zOTU_120 | 0                      | 0                      | 32                        | 26                        | 32                        | 9                         | 39                        | 148                        | 65                      | 25                    | KU841564_Bacteria;Cyanobacteria;Oxyphotobacteria;Synechococcales;Cyanobacteria;Cyanobium PCC-6307;uncultured Cyanobium sp.               | 99.815         | 542                  |
| zOTU_122 | 0                      | 0                      | 2                         | 0                         | 0                         | 1                         | 0                         | 0                          | 0                       | 0                     | KU841564_Bacteria;Cyanobacteria;Oxyphotobacteria;Synechococcales;Cyanobacteria;Cyanobium PCC-6307;uncultured Cyanobium sp.               | 99.815         | 542                  |
| zOTU_48  | 0                      | 0                      | 180                       | 236                       | 188                       | 56                        | 223                       | 527                        | 333                     | 127                   | KU841564_Bacteria;Cyanobacteria;Oxyphotobacteria;Synechococcales;Cyanobacteria;Cyanobium PCC-6307;uncultured Cyanobium sp.               | 99.815         | 542                  |
| zOTU_59  | 0                      | 0                      | 12                        | 17                        | 30                        | 9                         | 14                        | 40                         | 13                      | 11                    | KU841564_Bacteria;Cyanobacteria;Oxyphotobacteria;Synechococcales;Cyanobacteria;Cyanobium PCC-6307;uncultured Cyanobium sp.               | 99.815         | 542                  |
| zOTU_60  | 0                      | 0                      | 18                        | 36                        | 23                        | 4                         | 27                        | 22                         | 11                      | 3                     | KU841564_Bacteria;Cyanobacteria;Oxyphotobacteria;Synechococcales;Cyanobacteria;Cyanobium PCC-6307;uncultured Cyanobium sp.               | 99.815         | 542                  |
| zOTU_63  | 0                      | 0                      | 19                        | 49                        | 38                        | 8                         | 28                        | 74                         | 45                      | 23                    | KU841564_Bacteria;Cyanobacteria;Oxyphotobacteria;Synechococcales;Cyanobacteria;Cyanobium PCC-6307;uncultured Cyanobium sp.               | 99.631         | 542                  |
| zOTU_65  | 0                      | 0                      | 22                        | 48                        | 56                        | 12                        | 28                        | 94                         | 34                      | 17                    | KU841564_Bacteria;Cyanobacteria;Oxyphotobacteria;Synechococcales;Cyanobacteria;Cyanobium PCC-6307;uncultured Cyanobium sp.               | 99.815         | 542                  |
| zOTU_81  | 0                      | 0                      | 2                         | 7                         | 2                         | 2                         | 3                         | 9                          | 2                       | 2                     | KU841564_Bacteria;Cyanobacteria;Oxyphotobacteria;Synechococcales;Cyanobacteria;Cyanobium PCC-6307;uncultured Cyanobium sp.               | 99.815         | 542                  |
| zOTU_82  | 0                      | 0                      | 4                         | 2                         | 5                         | 2                         | 5                         | 4                          | 2                       | 1                     | KU841564_Bacteria;Cyanobacteria;Oxyphotobacteria;Synechococcales;Cyanobacteria;Cyanobium PCC-6307;uncultured Cyanobium sp.               | 99.815         | 542                  |
| zOTU_86  | 0                      | 0                      | 1                         | 1                         | 1                         | 2                         | 1                         | 4                          | 1                       | 0                     | KU841564_Bacteria;Cyanobacteria;Oxyphotobacteria;Synechococcales;Cyanobacteria;Cyanobium PCC-6307;uncultured Cyanobium sp.               | 99.815         | 542                  |
| zOTU_87  | 0                      | 0                      | 0                         | 0                         | 0                         | 0                         | 0                         | 0                          | 0                       | 0                     | KU841564_Bacteria;Cyanobacteria;Oxyphotobacteria;Synechococcales;Cyanobacteria;Cyanobium PCC-6307;uncultured Cyanobium sp.               | 99.815         | 542                  |
| zOTU_98  | 0                      | 0                      | 2                         | 0                         | 0                         | 1                         | 0                         | 2                          | 3                       | 0                     | KU841564_Bacteria;Cyanobacteria;Oxyphotobacteria;Synechococcales;Cyanobacteria;Cyanobium PCC-6307;uncultured Cyanobium sp.               | 99.815         | 542                  |
| zOTU_14  | 0                      | 0                      | 48                        | 636                       | 75                        | 68                        | 139                       | 380                        | 395                     | 406                   | KU841588_Bacteria;Cyanobacteria;Oxyphotobacteria;Synechococcales;Cyanobacteria;Cyanobium PCC-6307;uncultured Synechococcus sp.           | 100.000        | 542                  |
| zOTU_42  | 0                      | 0                      | 9                         | 4                         | 6                         | 1                         | 4                         | 77                         | 3                       | 9                     | KU841588_Bacteria;Cyanobacteria;Oxyphotobacteria;Synechococcales;Cyanobacteria;Cyanobium PCC-6307;uncultured Synechococcus sp.           | 99.815         | 542                  |
| zOTU_47  | 0                      | 0                      | 30                        | 572                       | 45                        | 31                        | 68                        | 254                        | 134                     | 156                   | KU841588_Bacteria;Cyanobacteria;Oxyphotobacteria;Synechococcales;Cyanobacteria;Cyanobium PCC-6307;uncultured Synechococcus sp.           | 99.815         | 542                  |
| zOTU_52  | 0                      | 0                      | 15                        | 29                        | 26                        | 14                        | 36                        | 100                        | 98                      | 98                    | KU841588_Bacteria;Cyanobacteria;Oxyphotobacteria;Synechococcales;Cyanobacteria;Cyanobium PCC-6307;uncultured Synechococcus sp.           | 99.815         | 542                  |
| zOTU_69  | 0                      | 0                      | 21                        | 38                        | 54                        | 31                        | 2                         | 35                         | 102                     | 11                    | KU841588_Bacteria;Cyanobacteria;Oxyphotobacteria;Synechococcales;Cyanobacteria;Cyanobium PCC                                             |                |                      |

**Table S11:** Main biotic and abiotic variables of the studied systems.

| System                                                      | Temporal      |               |               |               |               |               |               |               |               |               | Spatial       |               |               |               |               |               |               |               |               |               |          |
|-------------------------------------------------------------|---------------|---------------|---------------|---------------|---------------|---------------|---------------|---------------|---------------|---------------|---------------|---------------|---------------|---------------|---------------|---------------|---------------|---------------|---------------|---------------|----------|
|                                                             | Blanes Bay    |               | Blanes Bay    |               | Chascomús     |               | Chascomús     |               | Chascomús     |               | Chascomús     |               | El Carpincho  |               | Bragado       |               | Monte         |               | Chascomús     |               |          |
| Sample date                                                 | Spring apr-13 | Summer Aug-13 | Spring oct-12 | Winter jun-13 | Spring jun-13 | Summer feb-14 | Autumn may-14 | Spring dic-09 | Summer nov-13 | Autumn oct-13 | Spring nov-13 | Summer aug-13 | Spring dic-09 | Summer oct-09 | Autumn nov-09 | Spring dic-09 | Summer oct-09 | Spring dic-09 | Summer oct-09 | Spring nov-13 |          |
| Vol.filtered (ml)                                           | 10000         | 10000         | 50            | 50            | 50            | 50            | 50            | 40            | 50            | 50            | 50            | 50            | 40            | 50            | 50            | 40            | 50            | 50            | 50            | 50            |          |
| WaterT° (°C)                                                | 14,51         | 23,58         | 20            | 6             | 6             | 1,69          | 1,92          | 2,03          | 2,03          | 2,03          | 2,03          | 2,03          | 2,03          | 2,03          | 2,03          | 2,03          | 2,03          | 2,03          | 2,03          | 2,03          |          |
| conductivity (mS cm <sup>-1</sup> )                         |               |               | 4200          | 5768          | 5768          | 4883          | 4883          | 4883          | 4883          | 4883          | 4883          | 4883          | 4883          | 4883          | 4883          | 4883          | 4883          | 4883          | 4883          | 4883          |          |
| TN (µg L <sup>-1</sup> )                                    |               |               | 747           | 364           | 364           | 491           | 491           | 491           | 491           | 491           | 491           | 491           | 491           | 491           | 491           | 491           | 491           | 491           | 491           | 491           |          |
| TP (µg L <sup>-1</sup> )                                    |               |               | 278           | 79            | 79            | 278           | 278           | 278           | 278           | 278           | 278           | 278           | 278           | 278           | 278           | 278           | 278           | 278           | 278           | 278           |          |
| Chl <i>a</i> (µg L <sup>-1</sup> )                          | 0,49          | 0,21          | 304           | 56            | 56            | 85            | 85            | 85            | 85            | 85            | 85            | 85            | 85            | 85            | 85            | 85            | 85            | 85            | 85            | 85            |          |
| Turbidity (NTU)                                             |               |               | 24            | 25            | 25            | 11            | 11            | 11            | 11            | 11            | 11            | 11            | 11            | 11            | 11            | 11            | 11            | 11            | 11            | 11            |          |
| KD <sub>(PAR)</sub> <sup>a</sup> (m <sup>-1</sup> )         |               |               | 0,93          | 0,99          | 0,99          | 1,12          | 1,12          | 1,12          | 1,12          | 1,12          | 1,12          | 1,12          | 1,12          | 1,12          | 1,12          | 1,12          | 1,12          | 1,12          | 1,12          | 1,12          |          |
| KD <sub>(red/green)</sub> <sup>b</sup> (m <sup>-1</sup> )   | 8,128         | 8,053         | 8,3           | 9,05          | 9,05          | 9,13          | 9,13          | 9,13          | 9,13          | 9,13          | 9,13          | 9,13          | 9,13          | 9,13          | 9,13          | 9,13          | 9,13          | 9,13          | 9,13          | 9,13          |          |
| pH                                                          | 7,91E+04      | 2,43E+04      | 2,00E+06      | 1,40E+07      | 1,40E+07      | 3,90E+06      | 3,90E+06 |
| <i>Synechococcus</i> (org ml <sup>-1</sup> ) <sup>c</sup>   |               |               | 8,77          | 1,06          | 1,06          | 1,12          | 1,12          | 1,12          | 1,12          | 1,12          | 1,12          | 1,12          | 1,12          | 1,12          | 1,12          | 1,12          | 1,12          | 1,12          | 1,12          | 1,12          |          |
| <i>Prochlorococcus</i> (org ml <sup>-1</sup> ) <sup>c</sup> | 885           | 32            | 2,00E+06      | 1,40E+07      | 1,40E+07      | 3,90E+06      | 3,90E+06 |

a) Vertical attenuation coefficient for PAR.

b) Vertical attenuation coefficient for red/green light ratio.

c) Number of cell per milliliter estimate by flow cytometry in Chascomús lake and Blanes Bay, and by epifluorescence microscopy in El Carpincho, Bragado and Monte lakes.

**Table S12:** Table showing sequence information used for the phylogenetic construction of reference trees: GenBank accession numbers, strain name, ecosystem/lake and country/continent isolation, clade assignment and sequence reference.

| Reference Tree    | Accession n°        | Strain name | Place of isolation           | Country/ Continent | Sub-cluster | Clade 16S rDNA  | Sequence reference  |
|-------------------|---------------------|-------------|------------------------------|--------------------|-------------|-----------------|---------------------|
| Marine            | <b>BX548174</b>     | MED4        | Mediterranean Sea            |                    |             | HLI             | Billier et al.(12)  |
| Marine            | <b>AF001468</b>     | MIT 9107    | Tropical Pacific             |                    |             | HLII            | Billier et al.(12)  |
| Marine            | <b>AF115268</b>     | MIT 9201    | Tropical Pacific             |                    |             | HLII            | Billier et al.(12)  |
| Marine            | <b>CP000576</b>     | MIT 9301    | Atlantic Ocean               |                    |             | HLII            | Billier et al.(12)  |
| Marine            | JNAV01000002        | MIT0602     | Station ALOHA/ North Pacific |                    |             | LLII-III        | Billier et al.(12)  |
| Marine            | <b>AE017126</b>     | SS120       |                              |                    |             | LLII-III        | Billier et al.(12)  |
| Freshwater        | HE805929            | 1G10        | Nahuel Huapi                 | Argentina          |             | Nahuel Huapi    | Callieri et al.(9)  |
| Freshwater        | HE805928            | 1F8         | Nahuel Huapi                 | Argentina          |             | Nahuel Huapi    | Callieri et al.(9)  |
| Freshwater        | HE805927            | 1E+11       | Nahuel Huapi                 | Argentina          |             | Nahuel Huapi    | Callieri et al.(9)  |
| Freshwater        | HE805924            | 1D8         | Moreno                       | Argentina          |             | Moreno/Morenito | Callieri et al.(9)  |
| Freshwater        | HE805923            | 1C8         | Moreno                       | Argentina          |             | Moreno/Morenito | Callieri et al.(9)  |
| Freshwater        | HE805920            | 9A8         | Morenito                     | Argentina          |             | Moreno/Morenito | Callieri et al.(9)  |
| Freshwater        | HE805919            | 9A2         | Morenito                     | Argentina          |             | Moreno/Morenito | Callieri et al.(9)  |
| Freshwater        | HE805945            | 5F7         | Orta                         | Italy              |             | A               | Callieri et al.(9)  |
| Marine            | <b>AF053396</b>     | MIT 9302    | Atlantic Ocean               |                    |             | HLII            | Coleman et al.(16)  |
| Freshwater        | AF216951            | PS 680      | Biwa                         | Japan              |             | N               | Crosbie et al. (8)  |
| Freshwater        | AF448063            | UBR         | brackish mangrove. Iriomote  | Japan              |             | PVIII           | Crosbie et al. (8)  |
| Freshwater        | AF330250            | LB B3       | Biwa                         | Japan              |             | PVIII           | Crosbie et al. (8)  |
| Freshwater        | AF330249            | LB G2       | Biwa                         | Japan              |             | PVIII           | Crosbie et al. (8)  |
| Freshwater        | AF448065            | NAN         | brackish marshland. Nagasaki | Japan              |             | N               | Crosbie et al. (8)  |
| Freshwater        | AY151249            | MW 100C3    | Mondsee                      | Austria            |             | I               | Crosbie et al. (8)  |
| Freshwater        | AY151247            | MW99B6      | Mondsee                      | Austria            |             | I               | Crosbie et al. (8)  |
| Freshwater        | AF330251            | BO 0014     | Constance                    | Cent. Europe       |             | I               | Crosbie et al. (8)  |
| Freshwater        | AF098373            | P 211       | Bylot island tundra pond     | Arctic             |             | I               | Crosbie et al. (8)  |
| Freshwater        | AY151243            | MW 6C6      | Mondsee                      | Austria            |             | H               | Crosbie et al. (8)  |
| Freshwater        | AY151239            | MW 6B4      | Mondsee                      | Austria            |             | H               | Crosbie et al. (8)  |
| Freshwater        | AY151234            | MW 26A5     | Mondsee                      | Austria            |             | H               | Crosbie et al. (8)  |
| Freshwater        | AY151233            | MW 25B5     | Mondsee                      | Austria            |             | H               | Crosbie et al. (8)  |
| Freshwater        | AF330248            | LM 94       | Maggiore                     | Italy              |             | H               | Crosbie et al. (8)  |
| Freshwater        | AF317074            | BO 8807     | Constance                    | Cent. Europe       |             | H               | Crosbie et al. (8)  |
| Freshwater        | AF216955            | PS723       | Biwa                         | Japan              |             | E               | Crosbie et al. (8)  |
| Freshwater        | AF216954            | PS721       | Biwa                         | Japan              |             | E               | Crosbie et al. (8)  |
| Freshwater        | AF216953            | PS 717      | Biwa                         | Japan              |             | E               | Crosbie et al. (8)  |
| Freshwater        | AM710383            | JJ27STR     | Machovo                      | Czech Rep.         |             | Cz              | Crosbie et al. (8)  |
| Freshwater        | AF330253            | BS 5        | Bornholm Sea                 | Europe             |             | Bornholm        | Crosbie et al. (8)  |
| Freshwater        | AF330252            | BS 4        | Bornholm Sea                 | Europe             |             | Bornholm        | Crosbie et al. (8)  |
| Freshwater        | AY151250            | MW 73B4     | Hallstättersee               | Austria            |             | B               | Crosbie et al. (8)  |
| Freshwater        | AY151248            | MW 10#1     | Mondsee                      | Austria            |             | B               | Crosbie et al. (8)  |
| Freshwater        | AY151245            | MW 76B2     | Hallstättersee               | Austria            |             | B               | Crosbie et al. (8)  |
| Freshwater        | AY151242            | MW 74D6     | Hallstättersee               | Austria            |             | B               | Crosbie et al. (8)  |
| Freshwater        | AY151241            | MW 73D5     | Hallstättersee               | Austria            |             | B               | Crosbie et al. (8)  |
| Freshwater        | AY151232            | MW 15#2     | Austria                      | Mondsee            |             | B               | Crosbie et al. (8)  |
| Freshwater        | AF317076            | SAG 3.81    | Zurich                       | Switzerland        |             | B               | Crosbie et al. (8)  |
| Freshwater        | AF317075            | BO 9404     | Constance                    | Cent. Europe       |             | B               | Crosbie et al. (8)  |
| Freshwater        | AF448072            | PCC 8966    | Brackish marshland           | France             |             | A               | Crosbie et al. (8)  |
| Freshwater        | AF330254            | BS20        |                              |                    |             | A               | Crosbie et al. (8)  |
| Freshwater        | AF330246            | BGS171      | Balaton                      | Hungary            |             | A               | Crosbie et al. (8)  |
| Freshwater        | AF317078            | BO983115    | Constance                    | Central Europe     |             | A               | Crosbie et al. (8)  |
| Freshwater        | AF317072            | BO8806      | Constance                    | Central Europe     |             | A               | Crosbie et al. (8)  |
| Freshwater        | AF317071            | BO8801      | Constance                    | Central Europe     |             | A               | Crosbie et al. (8)  |
| Freshwater        | AF216944            | PCC 6904    | Stream                       | USA                |             | A               | Crosbie et al. (8)  |
| Freshwater        | AJ133176            | GL 150636   | GrandLieu                    | France             |             | A               | Crosbie et al. (8)  |
| Freshwater        | AF448071            | PCC 8916    | brackish marshland           | France             |             | A               | Crosbie et al. (8)  |
| Freshwater        | AF317077            | BO 981502   | Constance                    | Cent. Europe       |             | A               | Crosbie et al. (8)  |
| Freshwater        | AF216952            | PS 715      | Akan                         | Japan              |             | A               | Crosbie et al. (8)  |
| Freshwater        | AF216948            | PCC 7920    | pond. Tolsa                  | Finland            |             | A               | Crosbie et al. (8)  |
| Freshwater        | AF216947            | PCC 7918    | pond                         | Finland            |             | A               | Crosbie et al. (8)  |
| Freshwater        | AF216945            | PCC 7009    | low salinity brine pond. CA  | USA                |             | A               | Crosbie et al. (8)  |
| Freshwater        | AF098374            | P 212       | Bylot island tundra pond     | Arctic             |             | A               | Crosbie et al. (8)  |
| Freshwater        | AF001477            | PCC 6307    | lake water Wisconsin         | USA                |             | A               | Crosbie et al. (8)  |
| Marine            | AATZ01000004        | BL107       | Mediterranean Sea            |                    | 5.1         | IV              | Dufresne et al.(17) |
| Marine            | CP000097            | CC9902      | Pacific Ocean                |                    | 5.1         | IV              | Dufresne et al.(17) |
| Marine            | CT978603            | RCC307      | Mediterranean Sea            |                    | 5.3         |                 | Dufresne et al.(17) |
| Marine            | <b>ALPB01000050</b> | W2          |                              |                    |             | HLIV            | Dufresne et al.(17) |
| Marine            | AF330247            | LPB1        | Lake Biwa                    |                    | 5.3         |                 | Ernst et al. (18)   |
| Marine            | AY172801            | CC9311      | Pacific Ocean                |                    | 5.1         | I               | Fuller et al. (19)  |
| Marine            | <b>AY172803</b>     | DIM(UW01)   |                              |                    | 5.1         | V               | Fuller et al. (19)  |
| Marine            | AY172811            | RS9901      | Gulf of Aqaba                |                    | 5.1         | IX              | Fuller et al. (19)  |
| Marine            | <b>AY172812</b>     | RS9902      | Gulf of Aqaba                |                    | 5.1         | II              | Fuller et al. (19)  |
| Marine            | <b>AY172814</b>     | RS9904      | Gulf of Aqaba                |                    | 5.1         | II              | Fuller et al. (19)  |
| Marine            | <b>AY172815</b>     | RS9905      | Gulf of Aqaba                |                    | 5.1         | III             | Fuller et al. (19)  |
| Marine            | <b>AY172816</b>     | RS9906      | Gulf of Aqaba                |                    | 5.1         | VIII            | Fuller et al. (19)  |
| Marine            | <b>AY172817</b>     | RS9907      | Gulf of Aqaba                |                    | 5.1         | II              | Fuller et al. (19)  |
| Marine/Freshwater | <b>AY172818</b>     | RS9908      | Gulf of Aqaba                |                    | 5.1         | II              | Fuller et al. (19)  |
| Marine/Freshwater | <b>AY172819</b>     | RS9909      | Gulf of Aqaba                |                    | 5.1         | VIII            | Fuller et al. (19)  |
| Marine/Freshwater | <b>AY172820</b>     | RS9910      | Gulf of Aqaba                |                    | 5.1         | II              | Fuller et al. (19)  |

Table S12 cont.

| Reference Tree | Accession n° | Strain name      | Place of isolation   | Country/ Continent | Sub-cluster | Clade 16S rDNA | Sequence reference |
|----------------|--------------|------------------|----------------------|--------------------|-------------|----------------|--------------------|
| Marine         | AY172821     | RS9911           | Gulf of Aqaba        |                    | 5.1         | II             | Fuller et al. (19) |
| Marine         | AY172822     | RS9912           | Gulf of Aqaba        |                    | 5.1         | II             | Fuller et al. (19) |
| Marine         | AY172823     | RS9913           | Gulf of Aqaba        |                    | 5.1         | VIII           | Fuller et al. (19) |
| Marine         | AY172824     | RS9914           | Gulf of Aqaba        |                    | 5.1         | VIII           | Fuller et al. (19) |
| Marine         | AY172825     | RS9915           | Gulf of Aqaba        |                    | 5.1         | III            | Fuller et al. (19) |
| Marine         | AY172829     | RS9919           | Gulf of Aqaba        |                    | 5.1         | II             | Fuller et al. (19) |
| Marine         | AY172831     | RS9921           | Gulf of Aqaba        |                    | 5.1         | IX             | Fuller et al. (19) |
| Freshwater     | KU841621     | Env. clone CH62  | Chascomús            | Argentina          |             | PVIII          | Huber et al. (4)   |
| Freshwater     | KU841610     | Env. clone CH51  | Chascomús            | Argentina          |             | PV             | Huber et al. (4)   |
| Freshwater     | KU841616     | Env. clone CH57  | Chascomús            | Argentina          |             | PV             | Huber et al. (4)   |
| Freshwater     | KU841566     | Env. clone CH07  | Chascomús            | Argentina          |             | PIV            | Huber et al. (4)   |
| Freshwater     | KU841572     | Env. clone CH13  | Chascomús            | Argentina          |             | PIV            | Huber et al. (4)   |
| Freshwater     | KU841579     | Env. clone CH20  | Chascomús            | Argentina          |             | PIV            | Huber et al. (4)   |
| Freshwater     | KU841580     | Env. clone CH21  | Chascomús            | Argentina          |             | PIV            | Huber et al. (4)   |
| Freshwater     | KU841581     | Env. clone CH22  | Chascomús            | Argentina          |             | PIV            | Huber et al. (4)   |
| Freshwater     | KU841582     | Env. clone CH23  | Chascomús            | Argentina          |             | PIV            | Huber et al. (4)   |
| Freshwater     | KU841592     | Env. clone CH33  | Chascomús            | Argentina          |             | PIV            | Huber et al. (4)   |
| Freshwater     | KU841593     | Env. clone CH34  | Chascomús            | Argentina          |             | PIV            | Huber et al. (4)   |
| Freshwater     | KU841596     | Env. clone CH37  | Chascomús            | Argentina          |             | PIV            | Huber et al. (4)   |
| Freshwater     | KU841599     | Env. clone CH40  | Chascomús            | Argentina          |             | PIV            | Huber et al. (4)   |
| Freshwater     | KU841614     | Env. clone CH55  | Chascomús            | Argentina          |             | PIV            | Huber et al. (4)   |
| Freshwater     | KU841570     | Env. clone CH11  | Chascomús            | Argentina          |             | PIII           | Huber et al. (4)   |
| Freshwater     | KU841642     | Env. clone CH83  | Chascomús            | Argentina          |             | PIII           | Huber et al. (4)   |
| Freshwater     | KU841653     | Env. clone CH94  | Chascomús            | Argentina          |             | PIII           | Huber et al. (4)   |
| Freshwater     | KU841655     | Env. clone CH96  | Chascomús            | Argentina          |             | PIII           | Huber et al. (4)   |
| Freshwater     | KU841567     | Env. clone CH08  | Chascomús            | Argentina          |             | PII            | Huber et al. (4)   |
| Freshwater     | KU841542     | Env. clone CH83  | Chascomús            | Argentina          |             | PI             | Huber et al. (4)   |
| Freshwater     | KU841562     | Env. clone CH03  | Chascomús            | Argentina          |             | PI             | Huber et al. (4)   |
| Freshwater     | KU841565     | Env. clone CH06  | Chascomús            | Argentina          |             | PI             | Huber et al. (4)   |
| Freshwater     | KU841578     | Env. clone CH19  | Chascomús            | Argentina          |             | PI             | Huber et al. (4)   |
| Freshwater     | KU841583     | Env. clone CH24  | Chascomús            | Argentina          |             | PI             | Huber et al. (4)   |
| Freshwater     | KU841585     | Env. clone CH26  | Chascomús            | Argentina          |             | PI             | Huber et al. (4)   |
| Freshwater     | KU841597     | Env. clone CH38  | Chascomús            | Argentina          |             | PI             | Huber et al. (4)   |
| Freshwater     | KU841598     | Env. clone CH39  | Chascomús            | Argentina          |             | PI             | Huber et al. (4)   |
| Freshwater     | KU841600     | Env. clone CH41  | Chascomús            | Argentina          |             | PI             | Huber et al. (4)   |
| Freshwater     | KU841601     | Env. clone CH42  | Chascomús            | Argentina          |             | PI             | Huber et al. (4)   |
| Freshwater     | KU841606     | Env. clone CH47  | Chascomús            | Argentina          |             | PI             | Huber et al. (4)   |
| Freshwater     | KU841608     | Env. clone CH49  | Chascomús            | Argentina          |             | PI             | Huber et al. (4)   |
| Freshwater     | KU841612     | Env. clone CH53  | Chascomús            | Argentina          |             | PI             | Huber et al. (4)   |
| Freshwater     | KU841613     | Env. clone CH54  | Chascomús            | Argentina          |             | PI             | Huber et al. (4)   |
| Freshwater     | KU841624     | Env. clone CH65  | Chascomús            | Argentina          |             | PI             | Huber et al. (4)   |
| Freshwater     | KU841625     | Env. clone CH66  | Chascomús            | Argentina          |             | PI             | Huber et al. (4)   |
| Freshwater     | KU841632     | Env. clone CH73  | Chascomús            | Argentina          |             | PI             | Huber et al. (4)   |
| Freshwater     | KU841633     | Env. clone CH74  | Chascomús            | Argentina          |             | PI             | Huber et al. (4)   |
| Freshwater     | KU841636     | Env. clone CH77  | Chascomús            | Argentina          |             | PI             | Huber et al. (4)   |
| Freshwater     | KU841639     | Env. clone CH80  | Chascomús            | Argentina          |             | PI             | Huber et al. (4)   |
| Freshwater     | KU841640     | Env. clone CH81  | Chascomús            | Argentina          |             | PI             | Huber et al. (4)   |
| Freshwater     | KU841645     | Env. clone CH86  | Chascomús            | Argentina          |             | PI             | Huber et al. (4)   |
| Freshwater     | KU841647     | Env. clone CH88  | Chascomús            | Argentina          |             | PI             | Huber et al. (4)   |
| Freshwater     | KU841648     | Env. clone CH89  | Chascomús            | Argentina          |             | PI             | Huber et al. (4)   |
| Freshwater     | KU841649     | Env. clone CH90  | Chascomús            | Argentina          |             | PI             | Huber et al. (4)   |
| Freshwater     | KU841651     | Env. clone CH92  | Chascomús            | Argentina          |             | PI             | Huber et al. (4)   |
| Freshwater     | KU841658     | Env. clone CH99  | Chascomús            | Argentina          |             | PI             | Huber et al. (4)   |
| Freshwater     | KU841672     | Env. clone CH113 | Chascomús            | Argentina          |             | PI             | Huber et al. (4)   |
| Freshwater     | KU841673     | Env. clone CH114 | Chascomús            | Argentina          |             | PI             | Huber et al. (4)   |
| Freshwater     | MG844481     | Env. clone SA37  | Salada de Monasterio | Argentina          |             | PI             | Huber et al. (4)   |
| Freshwater     | KU841564     | Env. clone CH05  | Chascomús            | Argentina          |             | CZ             | Huber et al. (4)   |
| Freshwater     | KU841568     | Env. clone CH09  | Chascomús            | Argentina          |             | CZ             | Huber et al. (4)   |
| Freshwater     | KU841569     | Env. clone CH10  | Chascomús            | Argentina          |             | CZ             | Huber et al. (4)   |
| Freshwater     | KU841586     | Env. clone CH27  | Chascomús            | Argentina          |             | CZ             | Huber et al. (4)   |
| Freshwater     | KU841587     | Env. clone CH28  | Chascomús            | Argentina          |             | CZ             | Huber et al. (4)   |
| Freshwater     | KU841588     | Env. clone CH29  | Chascomús            | Argentina          |             | CZ             | Huber et al. (4)   |
| Freshwater     | KU841615     | Env. clone CH56  | Chascomús            | Argentina          |             | CZ             | Huber et al. (4)   |
| Freshwater     | KU841629     | Env. clone CH70  | Chascomús            | Argentina          |             | CZ             | Huber et al. (4)   |
| Freshwater     | KU841635     | Env. clone CH76  | Chascomús            | Argentina          |             | CZ             | Huber et al. (4)   |
| Freshwater     | KU841560     | Env. clone CH01  | Chascomús            | Argentina          |             | A              | Huber et al. (4)   |
| Freshwater     | KU841561     | Env. clone CH02  | Chascomús            | Argentina          |             | A              | Huber et al. (4)   |
| Freshwater     | FJ763779     | MA 0607 K        | Majcz                | Poland             |             | PVIII          | Jasser et al. (10) |
| Freshwater     | GQ130156     | MA 0607 B        | Majcz                | Poland             |             | M              | Jasser et al. (10) |
| Freshwater     | GQ130153     | MI 0607 B        | Mikolajske           | Poland             |             | M              | Jasser et al. (10) |
| Freshwater     | GQ130150     | MI 0607 D        | Mikolajske           | Poland             |             | M              | Jasser et al. (10) |
| Freshwater     | GQ130146     | MI 0608 G        | Mikolajskie          | Poland             |             | M              | Jasser et al. (10) |
| Freshwater     | GQ130143     | MA 0607 E        | Majcz                | Poland             |             | M              | Jasser et al. (10) |
| Freshwater     | FJ763787     | MA 0607 A        | Majcz                | Poland             |             | M              | Jasser et al. (10) |
| Freshwater     | FJ763786     | MA 0607 I        | Majcz                | Poland             |             | M              | Jasser et al. (10) |

Table S12 cont.

| Reference Tree    | Accession n°        | Strain name    | Place of isolation           | Country/ Continent | Sub-cluster | Clade 16S rDNA | Sequence reference    |
|-------------------|---------------------|----------------|------------------------------|--------------------|-------------|----------------|-----------------------|
| Freshwater        | FJ763785            | MI 0607 I      | Mikolajskie                  | Poland             |             | M              | Jasser et al. (10)    |
| Freshwater        | FJ763784            | MA 0607 G      | Majcz                        | Poland             |             | M              | Jasser et al. (10)    |
| Freshwater        | FJ763783            | MI 0608 A      | Mikolajskie                  | Poland             |             | M              | Jasser et al. (10)    |
| Freshwater        | FJ763781            | MA 0607 C      | Majcz                        | Poland             |             | M              | Jasser et al. (10)    |
| Freshwater        | FJ763780            | MA 0607 F      | Majcz                        | Poland             |             | M              | Jasser et al. (10)    |
| Freshwater        | FJ763776            | MA 0607 H      | Majcz                        | Poland             |             | M              | Jasser et al. (10)    |
| Freshwater        | FJ763775            | MA 0607 J      | Majcz                        | Poland             |             | M              | Jasser et al. (10)    |
| Freshwater        | FJ763768            | MA 0607 L      | Majcz                        | Poland             |             | M              | Jasser et al. (10)    |
| Freshwater        | FJ763778            | BE 0807 L      | Beldany                      | Poland             |             | Cz             | Jasser et al. (10)    |
| Freshwater        | FJ763772            | BE 0807 G      | Beldany                      | Poland             |             | Cz             | Jasser et al. (10)    |
| Freshwater        | FJ763770            | BE 0807 F      | Beldany                      | Poland             |             | Cz             | Jasser et al. (10)    |
| Freshwater        | FJ763769            | MA 0607        | Majcz                        | Poland             |             | B              | Jasser et al. (10)    |
| Freshwater        | FJ763767            | MI 0507 B      | Mikolajskie                  | Poland             |             | B              | Jasser et al. (10)    |
| Freshwater        | GQ130155            | MA 0607 N      | Majcz                        | Poland             |             | A              | Jasser et al. (10)    |
| Freshwater        | GQ130149            | SN 0807        | Śniardwy                     | Poland             |             | A              | Jasser et al. (10)    |
| Freshwater        | GQ130148            | BE 0807 J      | Beldany                      | Poland             |             | A              | Jasser et al. (10)    |
| Freshwater        | GQ130147            | MI 0608 H      | Mikolajskie                  | Poland             |             | A              | Jasser et al. (10)    |
| Freshwater        | GQ130145            | MI 0407        | Mikolajskie                  | Poland             |             | A              | Jasser et al. (10)    |
| Freshwater        | GQ130144            | MA 0607 M      | Majcz                        | Poland             |             | A              | Jasser et al. (10)    |
| Freshwater        | GQ130142            | MA 0607 D      | Majcz                        | Poland             |             | A              | Jasser et al. (10)    |
| Freshwater        | FJ763777            | BE 0807 K      | Beldany                      | Poland             |             | A              | Jasser et al. (10)    |
| Freshwater        | FJ763774            | MI 0608 F      | Mikolajskie                  | Poland             |             | A              | Jasser et al. (10)    |
| Freshwater        | FJ763773            | MA 0707 A      | Majcz                        | Poland             |             | A              | Jasser et al. (10)    |
| Freshwater        | FJ763771            | MA 0707 B      | Majcz                        | Poland             |             | A              | Jasser et al. (10)    |
| Marine            | <b>CP000551</b>     | AS9601         | Indian Ocean                 |                    |             | HLII           | Kettler et al.(20)    |
| Marine            | <b>AF001472</b>     | GP2            | Western Pacific              |                    |             | HLII           | Kettler et al.(20)    |
| Marine            | <b>AF115269</b>     | MIT 9202       | Pacific Ocean                |                    |             | HLII           | Kettler et al.(20)    |
| Marine            | <b>AF115271</b>     | MIT 9215       | Pacific Ocean                |                    |             | HLII           | Kettler et al.(20)    |
| Marine            | <b>AF001471</b>     | PAC1           | Station ALOHA/ North Pacific |                    |             | LLI            | Kettler et al.(20)    |
| Marine            | <b>AF001473</b>     | SB             | Western Pacific              |                    |             | HLII           | Kettler et al.(20)    |
| Marine            | <b>ALP10100039</b>  | W11            |                              |                    |             | HLIV           | Kettler et al.(20)    |
| Marine            | <b>ALPD01000082</b> | W4             |                              |                    |             | HLIV           | Kettler et al.(20)    |
| Freshwater        | AM710382            | JJCD           | Svet                         | Czech Rep.         |             | PIII           | Komarek et al. (21)   |
| Freshwater        | AM710381            | JJR2A5         | Rimov                        | Czech Rep.         |             | A              | Komarek et al. (21)   |
| Freshwater        | AM710380            | JJM10D5        | Machovojezero                | Czech Rep.         |             | A              | Komarek et al. (21)   |
| Freshwater        | AM710351            | JJNV           | pond in Nova Rise            | Czech Rep.         |             | A              | Komarek et al. (21)   |
| Freshwater        | AJ639901            | 0BB21S01       | Bubano Basin                 | Italy              |             | A              | Komarek et al. (21)   |
| Marine            | <b>JF306717</b>     | Biosope_211    | Pacific Ocean                |                    | 5.1         | I              | Le Gall et al. (22)   |
| Marine            | <b>JF306719</b>     | Biosope_45 C4Y | Pacific Ocean                |                    | 5.1         | CRD1           | Le Gall et al. (22)   |
| Marine            | <b>JF306723</b>     | Biosope_199    | Pacific Ocean                |                    | 5.1         | CRD1           | Le Gall et al. (22)   |
| Marine            | <b>JNAO01000008</b> | MIT 9314       | Atlantic Ocean               |                    |             | HLII           | Malmstrom et al. (23) |
| Marine            | <b>JNAP01000007</b> | MIT 9321       | Equatorial Pacific           |                    |             | HLII           | Malmstrom et al. (23) |
| Marine            | <b>CP000552</b>     | MIT 9515       | Pacific Ocean                |                    |             | HLI            | Malmstrom et al. (23) |
| Marine            | <b>CP000553</b>     | NATL1A         |                              |                    |             | LLI            | Malmstrom et al. (23) |
| Marine/Freshwater | <b>AF001467</b>     | NATL2A         |                              |                    |             | LLI            | Malmstrom et al. (23) |
| Marine            | AY172807            | Mimos11        | Mediterranean Sea            |                    | 5.3         |                | Mazard et al. (24)    |
| Marine            | <b>JF306652</b>     | BL8            | Mediterranean Sea            |                    | 5.1         | VI             | Mazard et al. (24)    |
| Marine            | <b>JF306653</b>     | PROSOPE_53-4   | Mediterranean Sea            |                    | 5.1         | VI             | Mazard et al. (24)    |
| Marine            | <b>JF306654</b>     | BL48           | Mediterranean Sea            |                    | 5.1         | VI             | Mazard et al. (24)    |
| Marine            | <b>JF306655</b>     | BL161          | Mediterranean Sea            |                    | 5.1         | VI             | Mazard et al. (24)    |
| Marine            | <b>JF306656</b>     | PROSOPE_77-2   | Mediterranean Sea            |                    | 5.1         | VI             | Mazard et al. (24)    |
| Marine            | <b>JF306657</b>     | BL164          | Mediterranean Sea            |                    | 5.1         | VI             | Mazard et al. (24)    |
| Marine            | <b>JF306659</b>     | BL36           | Mediterranean Sea            |                    | 5.1         | VI             | Mazard et al. (24)    |
| Marine            | <b>JF306661</b>     | PROSOPE_41-3   | Mediterranean Sea            |                    | 5.1         | XVI            | Mazard et al. (24)    |
| Marine            | <b>JF306662</b>     | PROSOPE_32-1   | Mediterranean Sea            |                    | 5.1         | II             | Mazard et al. (24)    |
| Marine            | <b>JF306663</b>     | PROSOPE_25     | Mediterranean Sea            |                    | 5.1         | VI             | Mazard et al. (24)    |
| Marine            | <b>JF306664</b>     | Eum13          | Atlantic Ocean               |                    | 5.1         | VI             | Mazard et al. (24)    |
| Marine            | <b>JF306665</b>     | PROSOPE_110    | Mediterranean Sea            |                    | 5.1         | VI             | Mazard et al. (24)    |
| Marine            | <b>JF306667</b>     | PROSOPE_37-2   | Mediterranean Sea            |                    | 5.1         | XVI            | Mazard et al. (24)    |
| Marine            | <b>JF306668</b>     | PROSOPE_117-1  | Mediterranean Sea            |                    | 5.1         | VI             | Mazard et al. (24)    |
| Marine            | <b>JF306669</b>     | PROSOPE_97-4   | Mediterranean Sea            |                    | 5.1         | VI             | Mazard et al. (24)    |
| Marine            | <b>JF306670</b>     | PROSOPE_153-3  | Mediterranean Sea            |                    | 5.1         | VI             | Mazard et al. (24)    |
| Marine            | <b>JF306671</b>     | PROSOPE_53-19  | Mediterranean Sea            |                    | 5.1         | VI             | Mazard et al. (24)    |
| Marine            | <b>JF306672</b>     | PROSOPE_25-2   | Mediterranean Sea            |                    | 5.1         | II             | Mazard et al. (24)    |
| Marine            | <b>JF306674</b>     | PROSOPE_49-2   | Mediterranean Sea            |                    | 5.1         | II             | Mazard et al. (24)    |
| Marine            | <b>JF306675</b>     | RA000711-27-14 | English channel              |                    | 5.1         | VI             | Mazard et al. (24)    |
| Marine            | <b>JF306676</b>     | PROSOPE_157-13 | Mediterranean Sea            |                    | 5.1         | VI             | Mazard et al. (24)    |
| Marine            | <b>JF306677</b>     | MED SN-5       | Mediterranean Sea            |                    | 5.1         | VI             | Mazard et al. (24)    |
| Marine            | <b>JF306678</b>     | PROSOPE_157-21 | Mediterranean Sea            |                    | 5.1         | VI             | Mazard et al. (24)    |
| Marine            | <b>JF306680</b>     | TAK 9802       | Pacific Ocean                |                    | 5.1         | II             | Mazard et al. (24)    |
| Marine            | <b>JF306684</b>     | PROSOPE_85-6   | Mediterranean Sea            |                    | 5.1         | XVI            | Mazard et al. (24)    |
| Marine            | <b>JF306686</b>     | BL3            | Mediterranean Sea            |                    | 5.3         |                | Mazard et al. (24)    |
| Marine            | <b>JF306690</b>     | A15-29         | Atlantic Ocean               |                    | 5.1         | III            | Mazard et al. (24)    |
| Marine            | <b>JF306691</b>     | A15-45         | Atlantic Ocean               |                    | 5.1         | V              | Mazard et al. (24)    |
| Marine            | <b>JF306692</b>     | A15-46         | Atlantic Ocean               |                    | 5.1         | V              | Mazard et al. (24)    |
| Marine            | <b>JF306695</b>     | A15-22         | Atlantic Ocean               |                    | 5.1         | III            | Mazard et al. (24)    |
| Marine            | <b>JF306696</b>     | A15-24.2       | Atlantic Ocean               |                    | 5.1         | III            | Mazard et al. (24)    |

**Table S12 cont.**

| Reference Tree | Accession n°       | Strain name            | Place of isolation      | Country/ Continent | Sub-cluster | Clade 16S rDNA | Sequence reference            |
|----------------|--------------------|------------------------|-------------------------|--------------------|-------------|----------------|-------------------------------|
| Marine         | <b>JF306697</b>    | A15-30                 | Atlantic Ocean          |                    | 5.1         | III            | Mazard et al. (24)            |
| Marine         | <b>JF306698</b>    | A15-38                 | Atlantic Ocean          |                    | 5.1         | II             | Mazard et al. (24)            |
| Marine         | <b>JF306702</b>    | A15-127                | Atlantic Ocean          |                    | 5.1         | WPC1           | Mazard et al. (24)            |
| Marine         | <b>JF306703</b>    | A15-130                | Atlantic Ocean          |                    | 5.1         | WPC1           | Mazard et al. (24)            |
| Marine         | <b>JF306705</b>    | A15-146                | Atlantic Ocean          |                    | 5.1         | II             | Mazard et al. (24)            |
| Marine         | <b>JF306707</b>    | A15-17                 | Atlantic Ocean          |                    | 5.1         | III            | Mazard et al. (24)            |
| Marine         | <b>JF306709</b>    | A15-19                 | Atlantic Ocean          |                    | 5.1         | II             | Mazard et al. (24)            |
| Marine         | <b>JF306712</b>    | A15-37                 | Atlantic Ocean          |                    | 5.1         | II             | Mazard et al. (24)            |
| Marine         | <b>JF306714</b>    | A15-61                 | Atlantic Ocean          |                    | 5.1         | II             | Mazard et al. (24)            |
| Marine         | <b>JF306724</b>    | PROSOPE_107            | Mediterranean Sea       |                    | 5.1         | I              | Mazard et al. (24)            |
| Freshwater     | AB610893           | Suigetsu-CR5           | Japan                   | Suigetsu           |             | PVIII          | Ohki <i>et al.</i> (25)       |
| Freshwater     | AB610889           | Suigetsu-CR3           | Japan                   | Suigetsu           |             | PVIII          | Ohki <i>et al.</i> (25)       |
| Freshwater     | AB610885           | Suigetsu-CR4           | Japan                   | Suigetsu           |             | PVIII          | Ohki <i>et al.</i> (25)       |
| Freshwater     | AB610886           | Suigetsu-CR2           | Japan                   | Suigetsu           |             | PVIII          | Ohki <i>et al.</i> (25)       |
| Freshwater     | AB610892           | Suigetsu-CG3           | Suigetsu                | Japan              |             | A              | Ohki <i>et al.</i> (25)       |
| Freshwater     | AB610891           | NIBB-1026              | Suigetsu                | Japan              |             | A              | Ohki <i>et al.</i> (25)       |
| Freshwater     | AB610890           | Suigetsu-CG4           | Suigetsu                | Japan              |             | A              | Ohki <i>et al.</i> (25)       |
| Freshwater     | AB610888           | Suigetsu-CG1           | Suigetsu                | Japan              |             | A              | Ohki <i>et al.</i> (25)       |
| Freshwater     | AB610887           | Suigetsu-CG2           | Suigetsu                | Japan              |             | A              | Ohki <i>et al.</i> (25)       |
| Marine         | <b>ALPE0100097</b> | W7                     |                         |                    |             | HLIII          | Rocap et al. (26)             |
| Marine         | <b>ALPG0100093</b> | W9                     |                         |                    |             | HLIII          | Rocap et al. (26)             |
| Freshwater     | EF638719           | Synechococcus sp. 19-3 | New Zealand             | Helensville Dam    |             | PVIII          | Rueckert <i>et al.</i> (27)   |
| Freshwater     | AY945300           | clone EW7              | Esthwaite Water         | England            |             | II             | Sanchez-Baracaldo et al. (28) |
| Freshwater     | AY945298           | cloneCWP124.2.10       | Cotswold Water Park 124 | England            |             | II             | Sanchez-Baracaldo et al. (28) |
| Freshwater     | AY945296           | cloneCWP123.2.2        | Cotswold Water Park 123 | England            |             | II             | Sanchez-Baracaldo et al. (28) |
| Freshwater     | AY945294           | clone CWP9.2.7         | Cotswold Water Park 9   | England            |             | II             | Sanchez-Baracaldo et al. (28) |
| Freshwater     | AY945293           | clone CWP9.2.33        | Cotswold Water Park 9   | England            |             | II             | Sanchez-Baracaldo et al. (28) |
| Freshwater     | AY945292           | cloneAP10.8            | Abbot's Pool            | England            |             | II             | Sanchez-Baracaldo et al. (28) |
| Freshwater     | AY943947           | clone AP10.7           | Abbot's Pool            | England            |             | II             | Sanchez-Baracaldo et al. (28) |
| Freshwater     | MG844502           | Env. clone SA15        | Salada de Monasterio    | Argentina          |             | SA I           | this work                     |
| Freshwater     | MG844509           | Env. clone SA08        | Salada de Monasterio    | Argentina          |             | PVII           | this work                     |
| Freshwater     | MG844492           | Env. clone SA26        | Salada de Monasterio    | Argentina          |             | PIX            | this work                     |
| Freshwater     | MG844458           | Env. clone TR21        | El Triunfo              | Argentina          |             | PVI            | this work                     |
| Freshwater     | MG844462           | Env. clone TR17        | El Triunfo              | Argentina          |             | PVI            | this work                     |
| Freshwater     | MG844470           | Env. clone TR09        | El Triunfo              | Argentina          |             | PVI            | this work                     |
| Freshwater     | MG844478           | Env. clone TR01        | El Triunfo              | Argentina          |             | PVI            | this work                     |
| Freshwater     | MG844484           | Env. clone SA34        | Salada de Monasterio    | Argentina          |             | PIII           | this work                     |
| Freshwater     | MG844493           | Env. clone SA25        | Salada de Monasterio    | Argentina          |             | PIII           | this work                     |
| Freshwater     | MG844495           | Env. clone SA23        | Salada de Monasterio    | Argentina          |             | PIII           | this work                     |
| Freshwater     | MG844496           | Env. clone SA22        | Salada de Monasterio    | Argentina          |             | PIII           | this work                     |
| Freshwater     | MG844510           | Env. clone SA07        | Salada de Monasterio    | Argentina          |             | PIII           | this work                     |
| Freshwater     | MG844437           | Env. clone TR42        | El Triunfo              | Argentina          |             | PIII           | this work                     |
| Freshwater     | MG844471           | Env. clone TR08        | El Triunfo              | Argentina          |             | PIII           | this work                     |
| Freshwater     | MG844497           | Env. clone SA21        | Salada de Monasterio    | Argentina          |             | PII            | this work                     |
| Freshwater     | MG844501           | Env. clone SA17        | Salada de Monasterio    | Argentina          |             | PII            | this work                     |
| Freshwater     | MG844451           | Env. clone TR28        | El Triunfo              | Argentina          |             | PII            | this work                     |
| Freshwater     | MG844454           | Env. clone TR25        | El Triunfo              | Argentina          |             | PII            | this work                     |
| Freshwater     | MG844466           | Env. clone TR13        | El Triunfo              | Argentina          |             | PII            | this work                     |
| Freshwater     | MG844474           | Env. clone TR05        | El Triunfo              | Argentina          |             | PII            | this work                     |
| Freshwater     | MG844482           | Env. clone SA36        | Salada de Monasterio    | Argentina          |             | PI             | this work                     |
| Freshwater     | MG844485           | Env. clone SA33        | Salada de Monasterio    | Argentina          |             | PI             | this work                     |
| Freshwater     | MG844486           | Env. clone SA32        | Salada de Monasterio    | Argentina          |             | PI             | this work                     |
| Freshwater     | MG844488           | Env. clone SA30        | Salada de Monasterio    | Argentina          |             | PI             | this work                     |
| Freshwater     | MG844487           | Env. clone SA31        | Salada de Monasterio    | Argentina          |             | PI             | this work                     |
| Freshwater     | MG844490           | Env. clone SA28        | Salada de Monasterio    | Argentina          |             | PI             | this work                     |
| Freshwater     | MG844491           | Env. clone SA27        | Salada de Monasterio    | Argentina          |             | PI             | this work                     |
| Freshwater     | MG844494           | Env. clone SA24        | Salada de Monasterio    | Argentina          |             | PI             | this work                     |
| Freshwater     | MG844498           | Env. clone SA20        | Salada de Monasterio    | Argentina          |             | PI             | this work                     |
| Freshwater     | MG844499           | Env. clone SA19        | Salada de Monasterio    | Argentina          |             | PI             | this work                     |
| Freshwater     | MG844503           | Env. clone SA14        | Salada de Monasterio    | Argentina          |             | PI             | this work                     |
| Freshwater     | MG844504           | Env. clone SA13        | Salada de Monasterio    | Argentina          |             | PI             | this work                     |
| Freshwater     | MG844505           | Env. clone SA12        | Salada de Monasterio    | Argentina          |             | PI             | this work                     |
| Freshwater     | MG844506           | Env. clone SA11        | Salada de Monasterio    | Argentina          |             | PI             | this work                     |
| Freshwater     | MG844507           | Env. clone SA10        | Salada de Monasterio    | Argentina          |             | PI             | this work                     |
| Freshwater     | MG844512           | Env. clone SA05        | Salada de Monasterio    | Argentina          |             | PI             | this work                     |
| Freshwater     | MG844514           | Env. clone SA03        | Salada de Monasterio    | Argentina          |             | PI             | this work                     |
| Freshwater     | MG844438           | Env. clone TR41        | El Triunfo              | Argentina          |             | PI             | this work                     |
| Freshwater     | MG844439           | Env. clone TR40        | El Triunfo              | Argentina          |             | PI             | this work                     |
| Freshwater     | MG844441           | Env. clone TR38        | El Triunfo              | Argentina          |             | PI             | this work                     |
| Freshwater     | MG844445           | Env. clone TR34        | El Triunfo              | Argentina          |             | PI             | this work                     |



**Table S12 cont.**

| Reference Tree | Accession n°    | Strain name     | Place of isolation            | Country/ Continent | Sub-cluster | Clade 16S rDNA | Sequence reference    |
|----------------|-----------------|-----------------|-------------------------------|--------------------|-------------|----------------|-----------------------|
| Freshwater     | MG844447        | Env. clone TR32 | El Triunfo                    | Argentina          |             | PI             | this work             |
| Freshwater     | MG844449        | Env. clone TR30 | El Triunfo                    | Argentina          |             | PI             | this work             |
| Freshwater     | MG844452        | Env. clone TR27 | El Triunfo                    | Argentina          |             | PI             | this work             |
| Freshwater     | MG844461        | Env. clone TR18 | El Triunfo                    | Argentina          |             | PI             | this work             |
| Freshwater     | MG844463        | Env. clone TR16 | El Triunfo                    | Argentina          |             | PI             | this work             |
| Freshwater     | MG844465        | Env. clone TR14 | El Triunfo                    | Argentina          |             | PI             | this work             |
| Freshwater     | MG844468        | Env. clone TR11 | El Triunfo                    | Argentina          |             | PI             | this work             |
| Freshwater     | MG844469        | Env. clone TR10 | El Triunfo                    | Argentina          |             | PI             | this work             |
| Freshwater     | MG844475        | Env. clone TR04 | El Triunfo                    | Argentina          |             | PI             | this work             |
| Freshwater     | MG844476        | Env. clone TR03 | El Triunfo                    | Argentina          |             | PI             | this work             |
| Freshwater     | MG844489        | Env. clone SA29 | Salada de Monasterio          | Argentina          |             | CZ             | this work             |
| Freshwater     | MG844500        | Env. clone SA18 | Salada de Monasterio          | Argentina          |             | CZ             | this work             |
| Freshwater     | MG844508        | Env. clone SA09 | Salada de Monasterio          | Argentina          |             | CZ             | this work             |
| Freshwater     | MG844511        | Env. clone SA06 | Salada de Monasterio          | Argentina          |             | CZ             | this work             |
| Freshwater     | MG844513        | Env. clone SA04 | Salada de Monasterio          | Argentina          |             | CZ             | this work             |
| Freshwater     | MG844515        | Env. clone SA02 | Salada de Monasterio          | Argentina          |             | CZ             | this work             |
| Freshwater     | MG844516        | Env. clone SA01 | Salada de Monasterio          | Argentina          |             | CZ             | this work             |
| Freshwater     | MG844442        | Env. clone TR37 | El Triunfo                    | Argentina          |             | CZ             | this work             |
| Freshwater     | MG844443        | Env. clone TR36 | El Triunfo                    | Argentina          |             | CZ             | this work             |
| Freshwater     | MG844448        | Env. clone TR31 | El Triunfo                    | Argentina          |             | CZ             | this work             |
| Freshwater     | MG844453        | Env. clone TR26 | El Triunfo                    | Argentina          |             | CZ             | this work             |
| Freshwater     | MG844455        | Env. clone TR24 | El Triunfo                    | Argentina          |             | CZ             | this work             |
| Freshwater     | MG844456        | Env. clone TR23 | El Triunfo                    | Argentina          |             | CZ             | this work             |
| Freshwater     | MG844457        | Env. clone TR22 | El Triunfo                    | Argentina          |             | CZ             | this work             |
| Freshwater     | MG844459        | Env. clone TR20 | El Triunfo                    | Argentina          |             | CZ             | this work             |
| Freshwater     | MG844464        | Env. clone TR15 | El Triunfo                    | Argentina          |             | CZ             | this work             |
| Freshwater     | MG844467        | Env. clone TR12 | El Triunfo                    | Argentina          |             | CZ             | this work             |
| Freshwater     | MG844472        | Env. clone TR07 | El Triunfo                    | Argentina          |             | CZ             | this work             |
| Freshwater     | MG844473        | Env. clone TR06 | El Triunfo                    | Argentina          |             | CZ             | this work             |
| Freshwater     | MG844477        | Env. clone TR02 | El Triunfo                    | Argentina          |             | CZ             | this work             |
| Freshwater     | HQ380799        | CENA118         | Praia dos Namorados           | Brazil             |             | A              | unpublished           |
| Freshwater     | GU935366        | Sai005          | drinking reservoir Saidenbach | Germany            |             | A              | Unpublished           |
| Freshwater     | GU935365        | Sai004          | drinking reservoir Saidenbach | Germany            |             | A              | Unpublished           |
| Freshwater     | GU935362        | Sai001          | drinking reservoir Saidenbach | Germany            |             | A              | Unpublished           |
| Freshwater     | FM177488        | 2LT34S03        | Trasimeno                     | Italy              |             | A              | unpublished           |
| Freshwater     | AF448067        | TAGS            | Finland                       | Brackish marshland |             | 2              | Unpublished           |
| Marine         | AF448068        | PS838           |                               |                    | 5.2         |                | Unpublished           |
| Marine         | AM709626        | PCC7001         | Atlantic Ocean                |                    | 5.2         |                | Unpublished           |
| Marine         | AY172832        | WH5701          | Atlantic Ocean                |                    | 5.2         |                | Waterbury et al. (29) |
| Marine         | <b>AY172835</b> | WH8020          | Sargasso Sea                  |                    | 5.1         | I              | Waterbury et al. (29) |
| Marine         | CT971583        | WH7803          | Atlantic Ocean                |                    | 5.1         | V              | Waterbury et al. (29) |

**Figure S1:** Mean Pearson correlation (Mantel test) of patristic distances among trees constructed for each SLS in triplicates. In all cases  $p < 0.05$ .

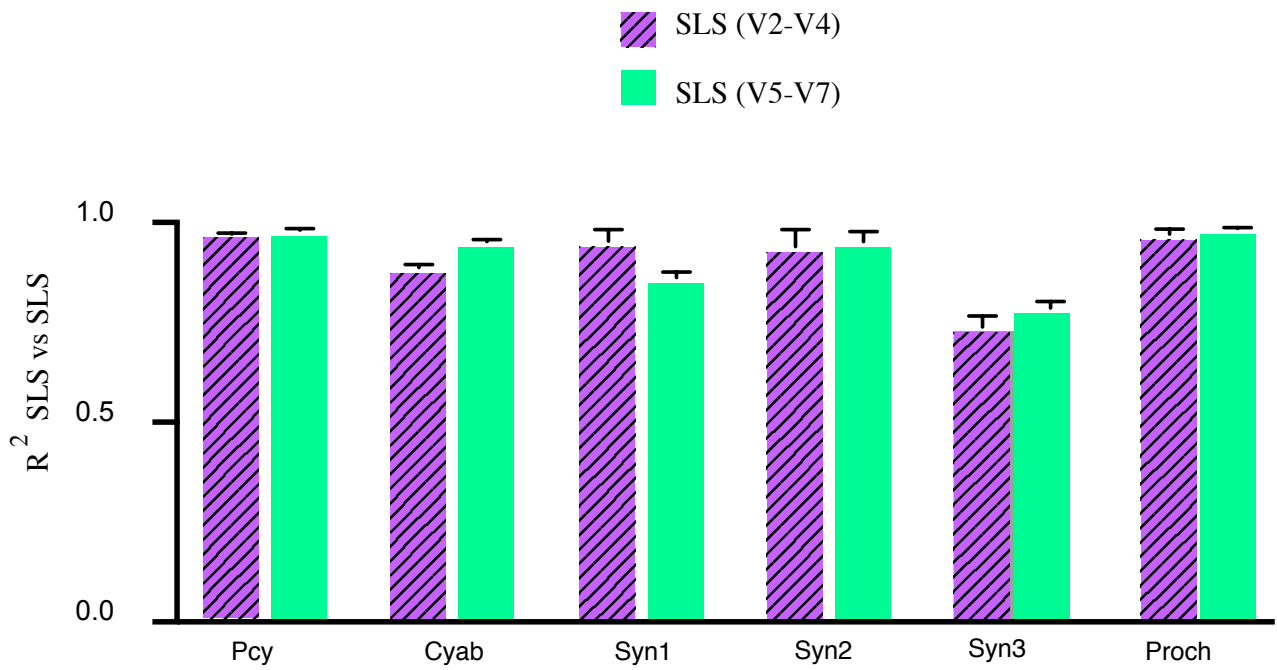

**Figure S2:** *In silico* evaluation of specificity and coverage rate for picocyanobacteria genera of primer pairs designed in this work compared with those proposed by Nübel et al. (13), Herlemann et al., (14) and Parada et al., (15) allowing zero, one and two mismatches.

**0 mismatch.**

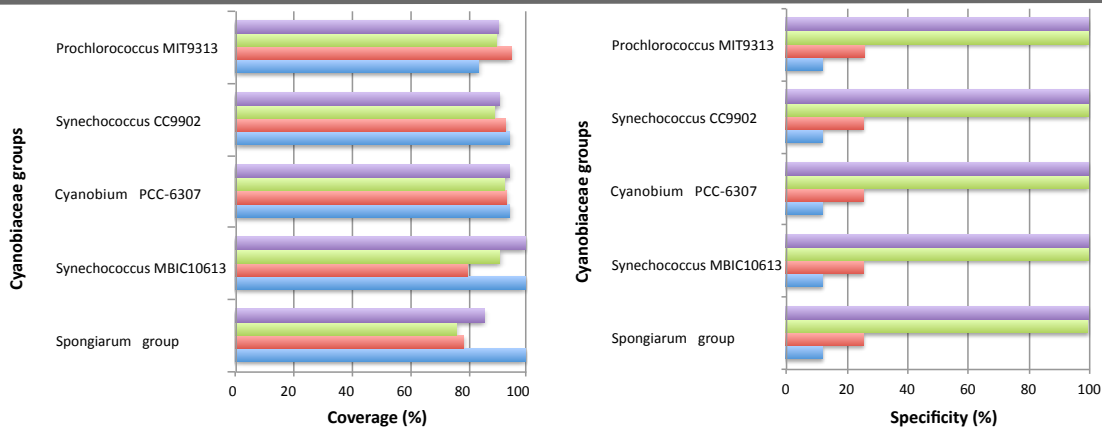

**1 mismatch.**

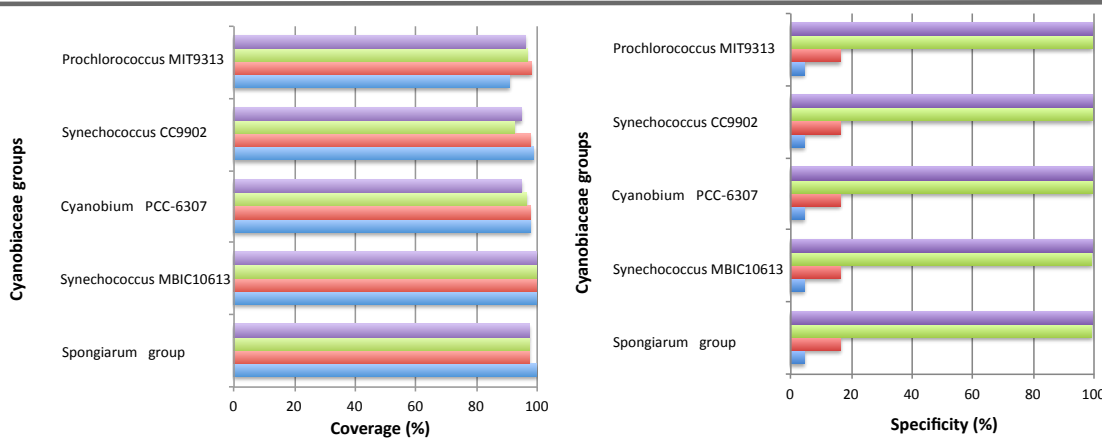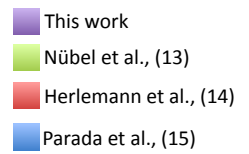

**2 mismatch.**

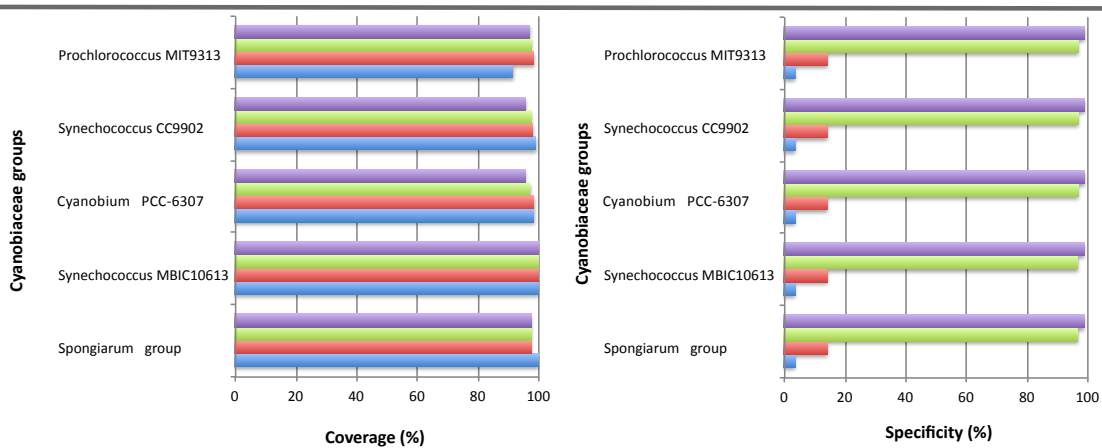

**Figure S3:** Rarefaction curves for the picocyanobacteria diversity in the ten samples studied.

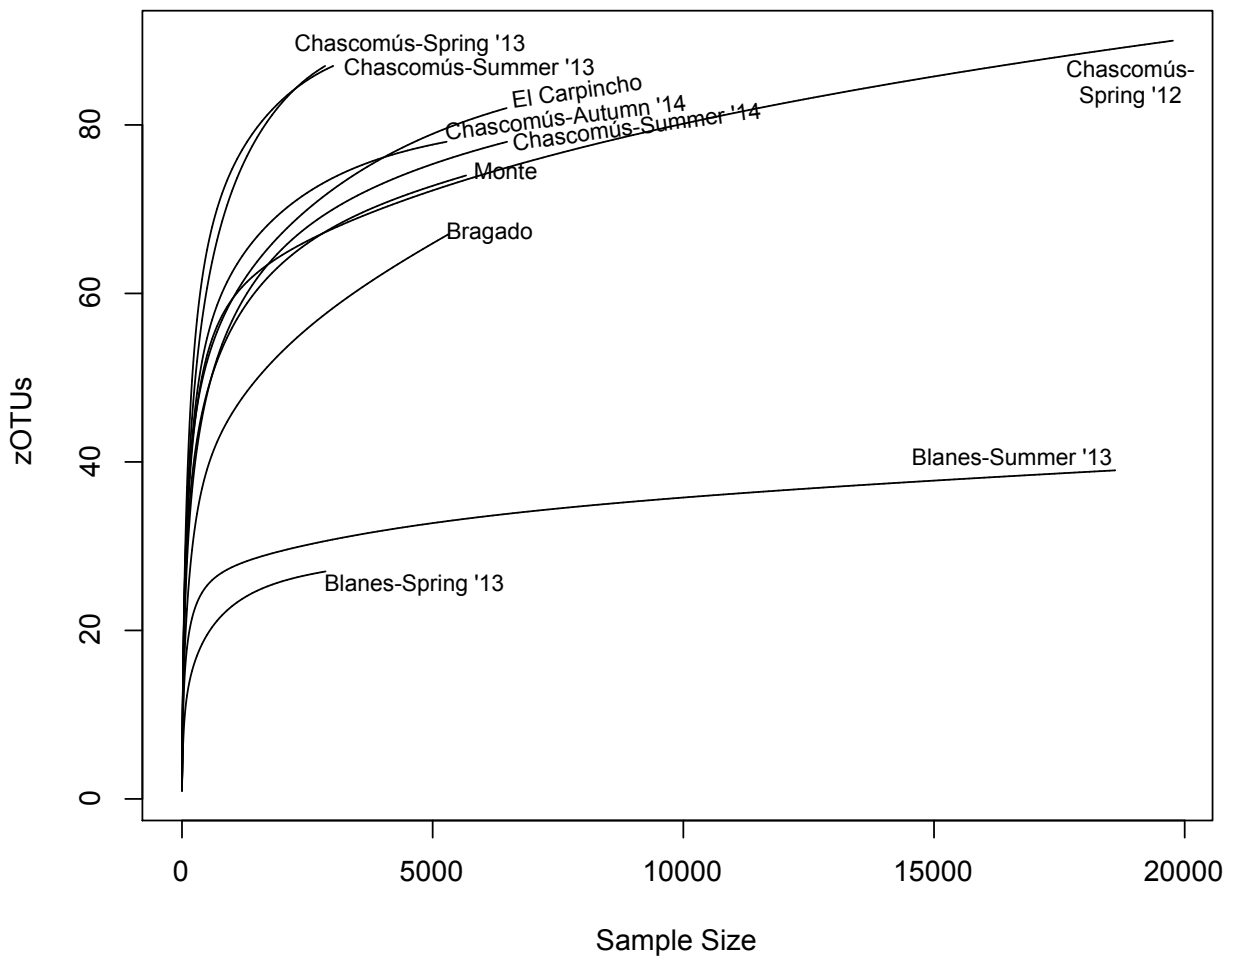

**Figure S4:** Phylogenetic tree based on the Reference Tree of marine picocyanobacteria showing the phyletic relationships of the zOTUs retrieved from Blanes Bay. Circle size in the nodes indicates the bootstrap values (1000 replicates of RT), values lower than 50 are not shown. The red circles represent the relative abundance of each zOTU.

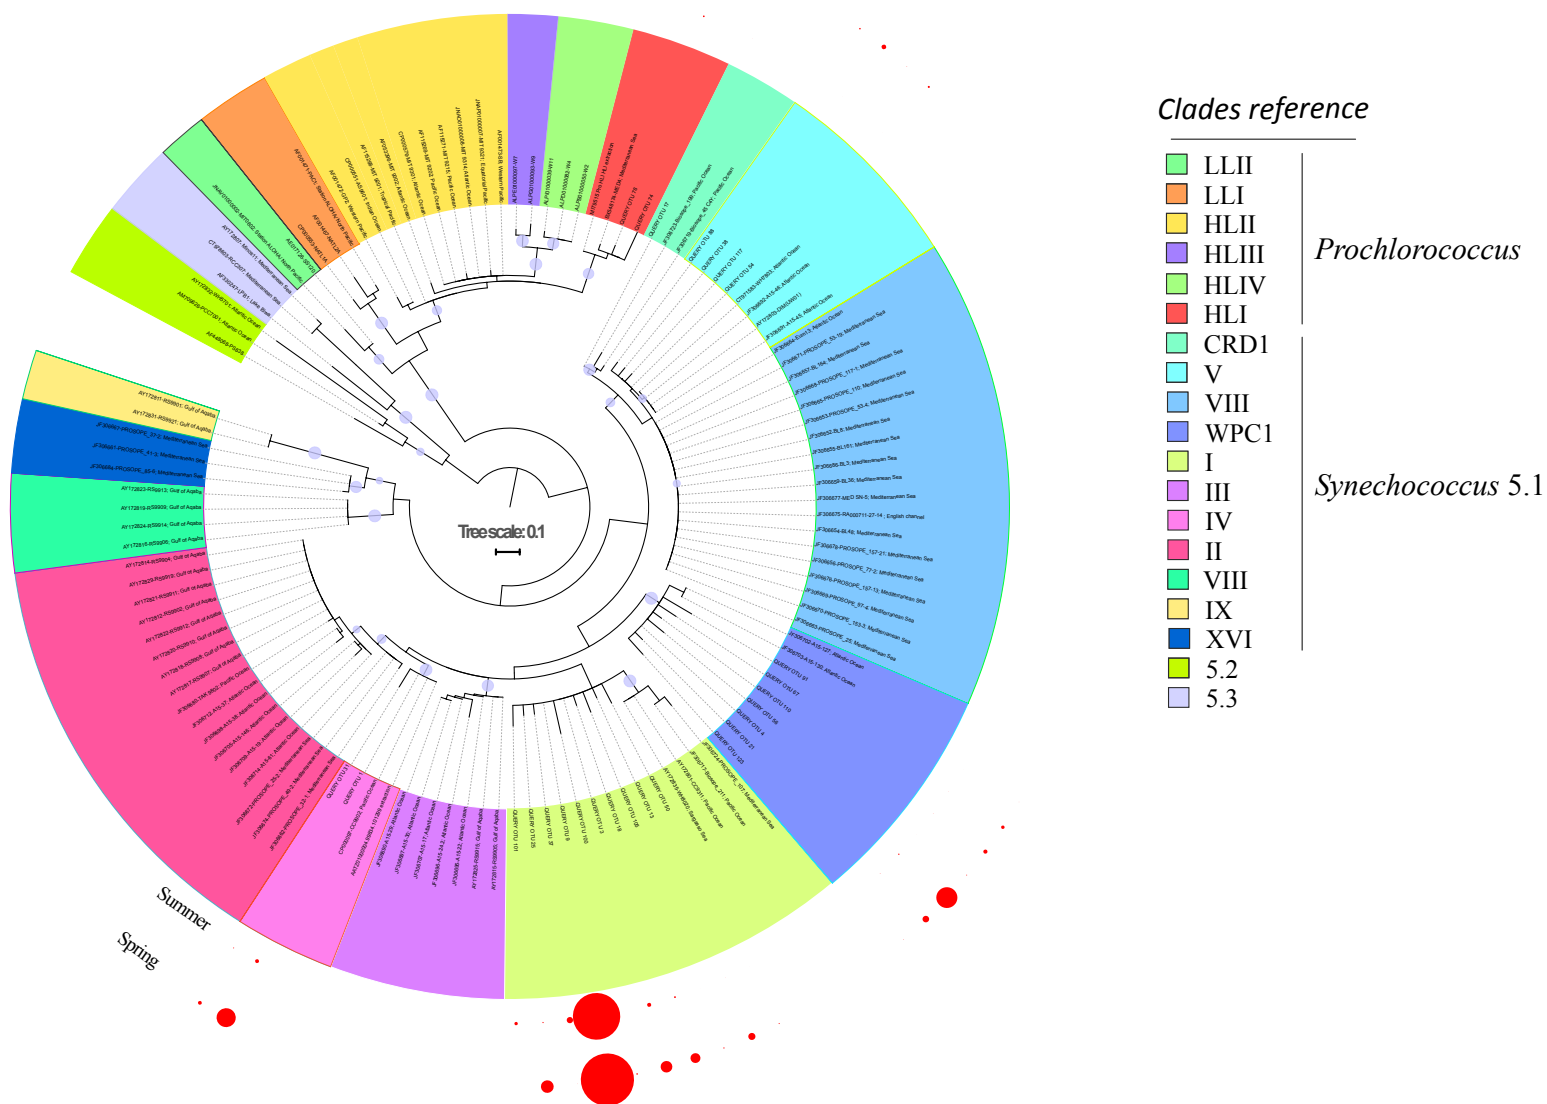

**Figure S5:** Phylogenetic tree based on the Reference Tree of freshwater picocyanobacteria showing the phyletic relationships of the zOTUs retrieved from Chascomús lake. Circle size in the nodes indicates the bootstrap values (1000 replicates of RT), values lower than 50 are not shown. The red circles represent the relative abundance of each zOTU. The numbers on the tree indicate the new clades represented exclusively by sequences presented here.

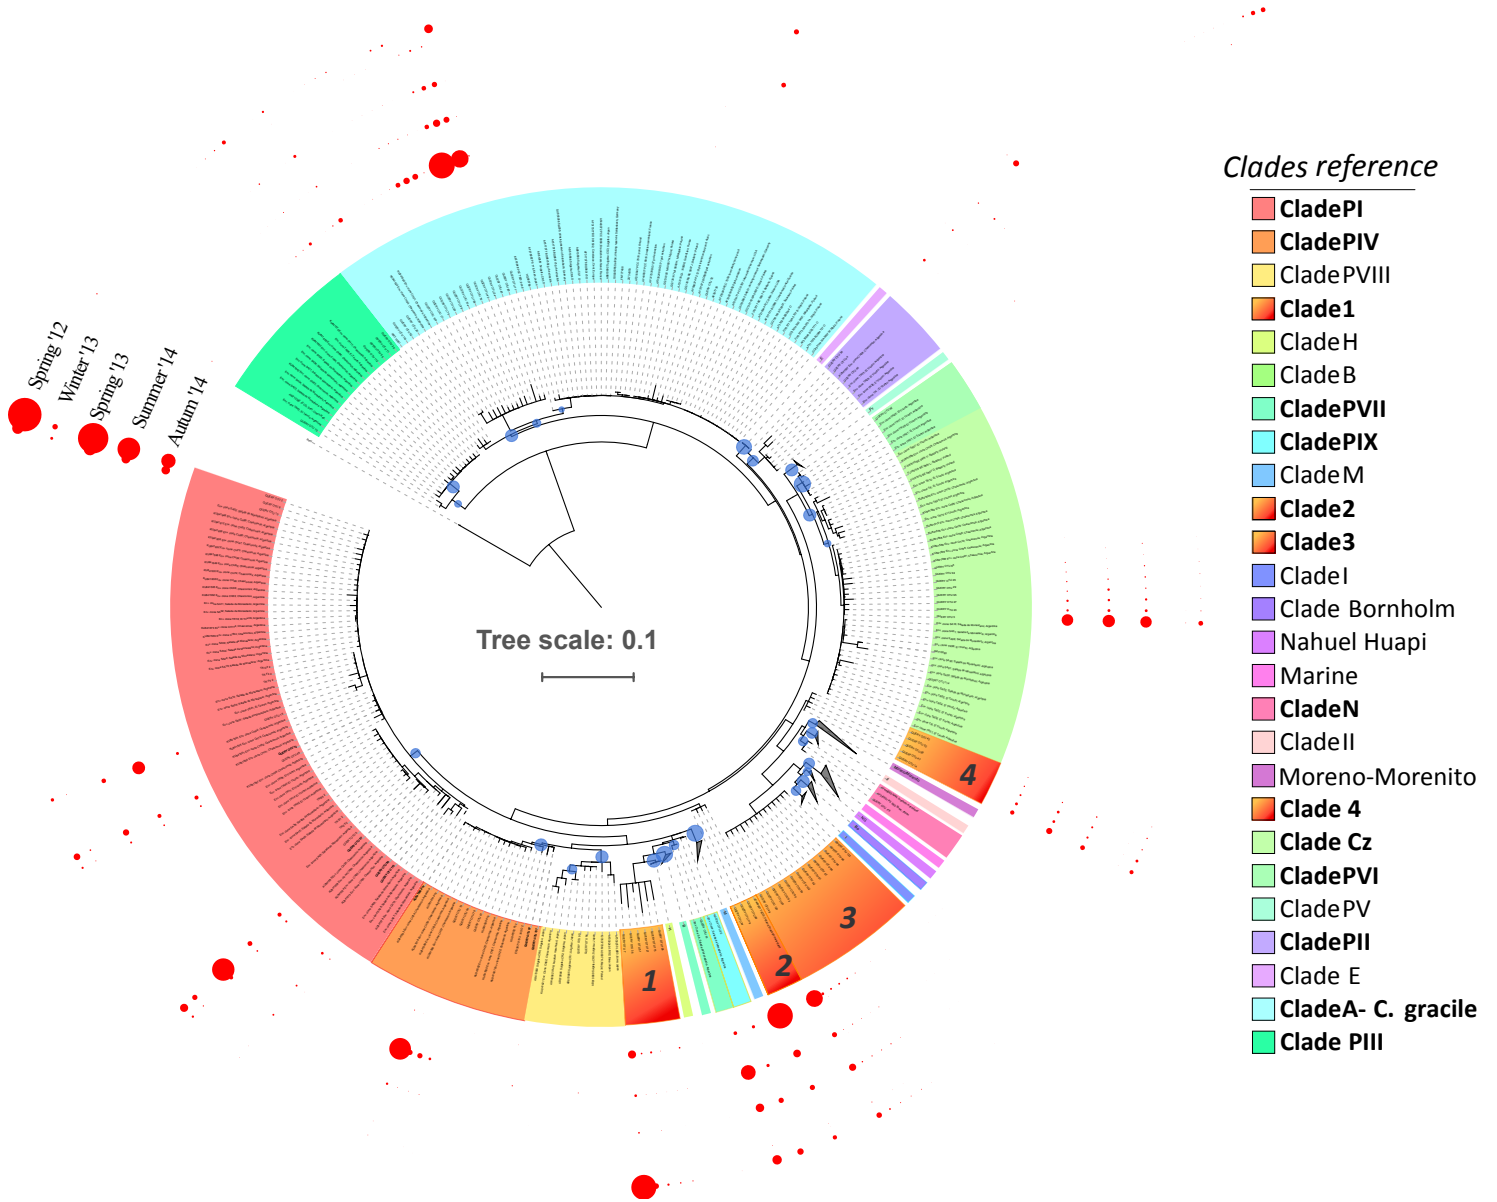

**Figure S6:** Phylogenetic tree based on the Reference tree of freshwater picocyanobacteria showing the phyletic relationships of the zOTUs retrieved from the Pampean lakes. Circle size in the nodes indicates the bootstrap values (1000 replicates of RT), values lower than 50 are not shown. The red circles represent the relative abundance of each zOTU. The numbers on the tree indicate the new clades represented exclusively by sequences presented here.

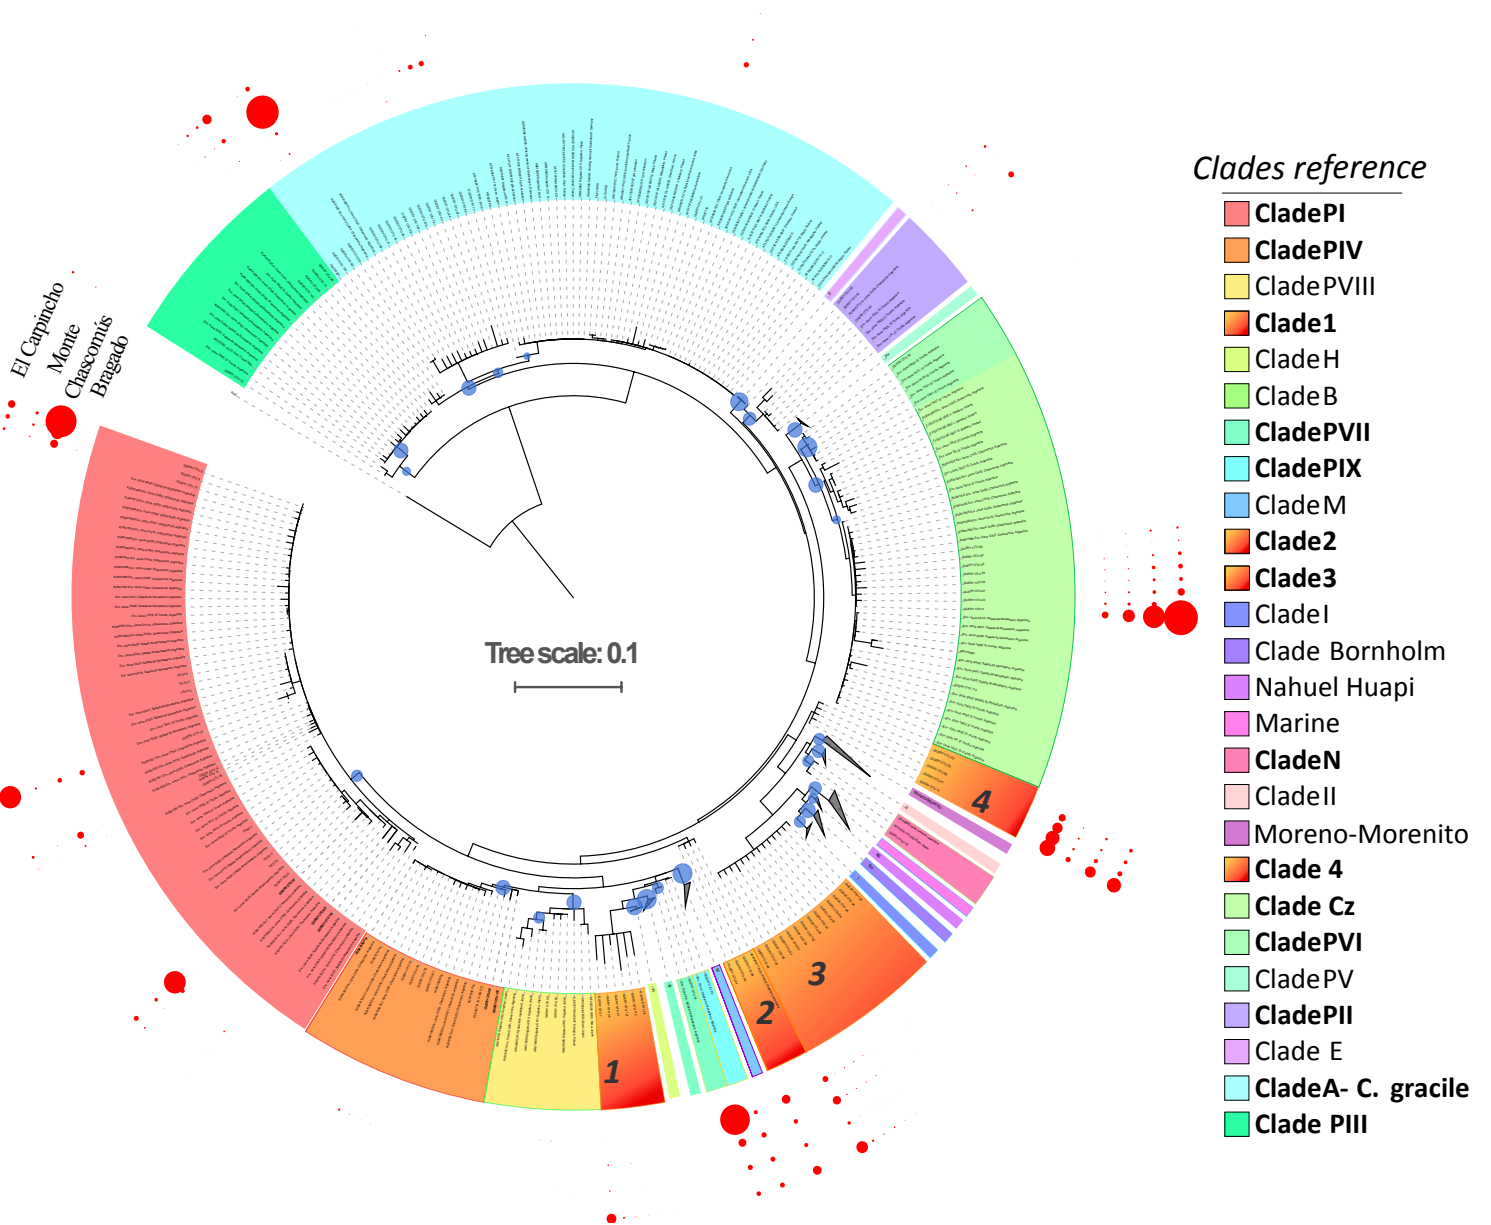

## Literature

1. Izaguirre I, Sánchez ML, Schiaffino MR, O'Farrell I, Huber P, Ferrer N, Zunino J, Lagomarsino L, Mancini M. 2015. Which environmental factors trigger the dominance of phytoplankton species across a moisture gradient of shallow lakes? *Hydrobiologia* 752: 47-64
2. Fernandez Zenoff V, Sineriz F, Farias ME. 2006. Diverse Responses to UV-B Radiation and Repair Mechanisms of Bacteria Isolated from High-Altitude Aquatic Environments. *Appl Environ Microbiol* 72:7857–7863.
3. Llames ME, Giorgio PA, Zagarese H, Ferraro M, Izaguirre I. 2013. Alternative states drive the patterns in the bacterioplankton composition in shallow Pampean lakes ( Argentina ). *Environ Microbiol Rep* 5:310–321.
4. Huber P, Diovisalvi N, Ferraro M, Metz S, Lagomarsino L, Llames ME, Royo-Llonch M, Bustingorry J, Escaray R, Acinas SG, Gasol JM, Unrein F. 2017. Phenotypic plasticity in freshwater picocyanobacteria. *Environ Microbiol* 19:1120–1133.
5. Edgar RC. 2010. Search and clustering orders of magnitude faster than BLAST. *Bioinformatics* 26:2460–2461.
6. Edgar RC, Haas BJ, Clemente JC, Quince C, Knight R. 2011. UCHIME improves sensitivity and speed of chimera detection. *Bioinformatics* 27:2194–2200.
7. Kears M, Moir R, Wilson A, Stones-Havas S, Cheung M, Sturrock S, Buxton S, Cooper A, Markowitz S, Duran C, Thierer T, Ashton B, Meintjes P, Drummond A. 2012. Geneious Basic: An integrated and extendable desktop software platform for the organization and analysis of sequence data. *Bioinformatics* 28:1647–1649.
8. Crosbie ND, Pöckl M, Weisse T. 2003. Dispersal and phylogenetic diversity of nonmarine picocyanobacteria, inferred from 16S rRNA gene and *cpcBA*-intergenic spacer sequence analyses. *Appl. Environ. Microbiol.* 69(9):25716-5721.
9. Callieri C, Coci M, Corno G, Macek M, Modenutti B, Balseiro E, Bertoni R. 2013. Phylogenetic diversity of nonmarine picocyanobacteria. *FEMS Microbiol. Ecol.* 85(2): 293-301.
10. Jasser I, Krolicka A and Karnkowska-Ishikawa A. 2011. A novel phylogenetic clade of picocyanobacteria from the Mazurian lakes (Poland) reflects the early ontogeny of glacial lakes. *FEMS Microbiol. Ecol.* 75(1):89-98.
11. Ahlgren NA and Rocap G. 2012. Diversity and distribution of marine *Synechococcus*: multiple gene phylogenies for consensus classification and development of qPCR assays for sensitive measurement of clades in the ocean. *Front Microbiol* 3: 213.
12. Biller SJ, Berube PM, Berta-Thompson JW, Kelly L, Roggensack SE, Awad L, ... Chisholm SW. 2014. Genomes of diverse isolates of the marine cyanobacterium *Prochlorococcus*. *Scientific Data*, 1, 140034. Retrieved from <http://dx.doi.org/10.1038/sdata.2014.34>
13. Nübel U, Garcia-Pichel F, Muyzer G. 1997. PCR primers to amplify 16S rRNA genes from cyanobacteria. *Appl Environ Microbiol* 63:3327–3332.
14. Herlemann DPR, Labrenz M, Jürgens K, Bertilsson S, Waniek JJ, Andersson AF. 2011. Transitions in bacterial communities along the 2000 km salinity gradient of the Baltic Sea. *ISME J* 5:1571–1579. Herlemann DPR, Labrenz M, Jürgens K, Bertilsson S, Waniek JJ,



- Andersson AF. 2011. Transitions in bacterial communities along the 2000 km salinity gradient of the Baltic Sea. *ISME J* 5:1571–1579.
15. Parada AE, Needham DM, Fuhrman JA. 2016. Every base matters: Assessing small subunit rRNA primers for marine microbiomes with mock communities, time series and global field samples. *Environ Microbiol* 18:1403–1414.
  16. Coleman ML, Chisholm SW. 2007. Code and context: *Prochlorococcus* as a model for cross-scale biology. *Trends Microbiol* 15(9): 398-407.
  17. Dufresne A, Ostrowski M, Scanlan DJ, Garczarek L, Mazard S, Palenik BP, Paulsen IT, de Marsac NT, Wincker P, Dossat C, Ferriera S, Johnson J, Post AF, Hess WR, Partensky F. 2008. Unraveling the genomic mosaic of a ubiquitous genus of marine cyanobacteria. *Genome Biol* 9:R90.
  18. Ernst A. 2003. Ecosystem-dependent adaptive radiations of picocyanobacteria inferred from 16S rRNA and ITS-1 sequence analysis. *Microbiology* 149:217–228.
  19. Fuller NJ, Marie D, Vaultot D, Post AF, Scanlan DJ. 2003. Clade-Specific 16S Ribosomal DNA Oligonucleotides Reveal the Predominance of a Single Marine. *Appl Environ Microbiol*. 69(5):2430-2443.
  20. Kettler GC, Martiny AC, Huang K, Zucker J, Coleman ML, Rodrigue S, Chen F, Lapidus A, Ferriera S, Johnson J, Steglich C, Church GM, Richardson P, Chisholm SW. 2007. Patterns and implications of gene gain and loss in the evolution of *Prochlorococcus*. *PLoS Genet*.
  21. Komárek J, Kaštovský J, Jezberová J. 2011. Phylogenetic and taxonomic delimitation of the cyanobacterial genus *Aphanothece* and description of *Anathece* gen. nov. *Eur J Phycol* 46(3): 315-326.
  22. Le Gall F, Rigaut-Jalabert F, Marie D, Garczarek L, Viprey M, Gobet A, Vaultot D. 2008. Picoplankton diversity in the South-East Pacific Ocean from cultures. *Biogeosciences* 5:203-214.
  23. Malmstrom RR, Rodrigue S, Huang KH, Kelly L, Kern SE, Thompson A, Roggensack S, Berube PM, Henn MR, Chisholm SW. 2013. Ecology of uncultured *Prochlorococcus* clades revealed through single-cell genomics and biogeographic analysis. *ISME J*. 7(1):184-198
  24. Mazard S, Ostrowski M, Partensky F, Scanlan DJ. 2012. Multi-locus sequence analysis, taxonomic resolution and biogeography of marine *Synechococcus*. *Environ Microbiol* 14:372–86.
  25. Ohki K, Yamada K, Kamiya M, Yoshikawa S. 2012. Morphological, Phylogenetic and Physiological Studies of Pico-Cyanobacteria Isolated from the Halocline of a Saline Meromictic Lake, Lake Suigetsu, Japan. *Microbes and Environments*. 27(2):171-178.
  26. Rocap G, Distel DL, Waterbury JB, Chisholm SW. 2002. Resolution of *Prochlorococcus* and *Synechococcus* ecotypes by using 16S-23S ribosomal DNA internal transcribed spacer sequences. *Appl Environ Microbiol* 68:1180–1191.
  27. Rueckert A, Wood SA, Cary SC. 2007. Development and field assessment of a quantitative PCR for the detection and enumeration of the noxious bloom-former *Anabaena planktonica*. *Limnol and Ocean: Methods*, 5, 474-483.
  28. Sánchez-Baracaldo P, Handley BA, Hayes PK. 2008. Picocyanobacterial community structure of freshwater lakes and the Baltic Sea revealed by phylogenetic analyses and clade-specific quantitative PCR. *Microbiol* 154:3347-3357.

29. Waterbury JB, Watson SW, Valois FW, Franks DG. 1986. Biological and ecological characterization of the marine unicellular cyanobacterium *Synechococcus*. In: Photosynthetic Picoplankton. Platt T, Li WKW eds. Canad. Bull. Fish. Aquatic Sci. 214: 71–120.
